# Supplementary material for: Drosulfakinin signaling modulates female sexual receptivity in Drosophila
Source: eLife. 2022 Apr 27;11:e76025. doi: 10.7554/eLife.76025 (PMC9045819; doi:10.7554/eLife.76025)
Supplement: Figure 1—figure supplement 2—source data 1. [file elife-76025-fig1-figsupp2-data1.xlsx]

## Sheet: Sheet1
Figure 1-figure supplement 2B
Genotpe	ovipositor extrusion/min	Genotpe	ovipositor extrusion/min	Genotpe	ovipositor extrusion/min
ΔDsk/ΔDsk	0.3	+/ΔDsk	1	﹢/﹢	0.2
	0.1		0.2		0.1
	1.9		0.7		1
	0.1		0.8		1.4
	2.3		0.8		1
	1.1		1		1.7
	0.2		0.6		1.6
	0.1		0.4		1.3
	0.8		0.9		1
	0.6		0.2		0
	1.3
	0.9
	0.8
	0.9
