# Supplementary material for: Drosulfakinin signaling modulates female sexual receptivity in Drosophila
Source: eLife. 2022 Apr 27;11:e76025. doi: 10.7554/eLife.76025 (PMC9045819; doi:10.7554/eLife.76025)
Supplement: Figure 1—figure supplement 3—source data 1. [file elife-76025-fig1-figsupp3-data1.xlsx]

## Sheet: Sheet1
Figure 1-figure supplement 3B				Figure 1-figure supplement 3C											Figure 1-figure supplement 3F											Figure 1-figure supplement 3G
fluorescence intensity				Genotpe	Copulation rate	StartTime	Genotpe	Copulation rate	StartTime	Genotpe	Copulation rate	StartTime			Genotpe	Copulation rate	StartTime	Genotpe	Copulation rate	StartTime	Genotpe	Copulation rate	StartTime			Genotpe	Copulation rate	StartTime	Genotpe	Copulation rate	StartTime	Genotpe	Copulation rate	StartTime
elavGal4/﹢;UAS-dcr2/﹢;﹢/﹢		elavGal4/﹢;UAS-dcr2/﹢;UAS-DskNAi/﹢		elavGal4/﹢;UAS-dcr2/﹢;UAS-DskNAi/﹢	0	00:15:54	﹢/﹢;﹢/﹢;UAS-DskNAi/﹢	0	00:01:02	elavGal4/﹢;UAS-dcr2/﹢;﹢/﹢	0	00:01:28			﹢/﹢;﹢/﹢;UAS-DskNAi/DskGal4	0	00:04:05	﹢/﹢;﹢/﹢;DskGAL4/﹢	0	00:03:16	﹢/﹢;﹢/﹢;UAS-DskNAi/﹢	0	00:01:50			﹢/﹢;﹢/﹢;UAS-DskNAi/Dilp2Gal4	0	00:01:25	﹢/﹢;﹢/﹢;DilpGAL4/﹢	0	00:01:35	﹢/﹢;﹢/﹢;UAS-DskNAi/﹢	0	00:03:30
0.861296		0.841368			0	00:08:01		0.0238095	00:01:53		0.0220588	00:03:50				0	00:08:07		0.0149254	00:02:28		0.0105263	00:03:22				0.00961538	00:01:43		0.0169492	00:30:00		0.0186916	00:02:21
1.19509		0.534514			0.0519481	00:04:34		0.178571	00:02:07		0.102941	00:00:53				0.028169	00:10:38		0.208955	00:05:19		0.157895	00:04:29				0.173077	00:01:50		0.194915	00:02:40		0.158879	00:02:08
1.21379		0.603102			0.194805	00:18:08		0.380952	00:05:33		0.220588	00:01:26				0.197183	00:11:49		0.432836	00:01:46		0.368421	00:03:02				0.346154	00:02:46		0.415254	00:01:31		0.364486	00:09:54
1.07677		0.505227			0.311688	00:08:20		0.595238	00:02:40		0.338235	00:30:00				0.323944	00:30:00		0.686567	00:04:38		0.557895	00:02:50				0.461538	00:03:13		0.610169	00:02:25		0.560748	00:04:52
1.03523		0.577943			0.363636	00:09:08		0.690476	00:01:23		0.507353	00:02:32				0.43662	00:02:08		0.716418	00:01:48		0.663158	00:03:28				0.596154	00:02:06		0.728814	00:06:14		0.672897	00:02:50
0.841947		0.479565			0.441558	00:12:42		0.738095	00:02:28		0.617647	00:00:45				0.464789	00:07:58		0.746269	00:03:30		0.726316	00:03:43				0.711538	00:04:28		0.771186	00:01:24		0.728972	00:04:33
1.07279		0.517108			0.532468	00:30:00		0.785714	00:03:19		0.742647	00:02:22				0.633803	00:07:05		0.791045	00:01:26		0.778947	00:09:50				0.798077	00:06:49		0.822034	00:30:00		0.785047	00:01:17
0.909995		0.616714			0.558442	00:03:12		0.833333	00:02:15		0.794118	00:02:24				0.71831	00:03:58		0.850746	00:02:42		0.821053	00:08:46				0.836538	00:06:10		0.872881	00:02:45		0.831776	00:01:17
0.952122					0.623377	00:03:46		0.880952	00:02:51		0.808824	00:04:16				0.746479	00:30:00		0.880597	00:02:00		0.863158	00:07:13				0.903846	00:02:02		0.923729	00:00:51		0.878505	00:03:02
0.840974					0.675325	00:05:32		0.916667	00:05:02		0.838235	00:05:47				0.816901	00:05:30		0.880597	00:02:40		0.894737	00:03:55				0.913462	00:03:19		0.940678	00:03:14		0.906542	00:08:46
					0.701299	00:04:58		0.928571	00:03:46		0.845588	00:03:48				0.84507	00:05:52		0.880597	00:04:52		0.905263	00:01:14				0.942308	00:24:21		0.949153	00:04:45		0.915888	00:01:14
					0.714286	00:04:02		0.940476	00:03:06		0.860294	00:04:12				0.873239	00:30:00		0.880597	00:01:35		0.915789	00:09:42				0.942308	00:05:28		0.949153	00:02:02		0.925234	00:19:27
					0.727273	00:06:00		0.940476	00:02:35		0.867647	00:03:27				0.887324	00:30:00		0.880597	00:05:33		0.926316	00:01:18				0.951923	00:01:34		0.957627	00:02:28		0.934579	00:06:02
					0.727273	00:05:43		0.952381	00:04:52		0.875	00:01:10				0.887324	00:12:48		0.895522	00:02:53		0.936842	00:04:00				0.951923	00:05:08		0.957627	00:07:31		0.943925	00:03:43
					0.727273	00:06:48		0.964286	00:01:29		0.882353	00:02:04				0.887324	00:03:26		0.910448	00:01:20		0.947368	00:03:00				0.971154	00:30:00		0.966102	00:02:44		0.953271	00:02:28
					0.766234	00:10:24		0.964286	00:02:13		0.889706	00:01:14				0.901408	00:04:35		0.910448	00:01:09		0.947368	00:03:36				0.971154	00:03:07		0.966102	00:08:25		0.953271	00:01:50
					0.779221	00:30:00		0.964286	00:00:55		0.889706	00:03:46				0.901408	00:09:43		0.925373	00:08:42		0.947368	00:13:44				0.971154	00:01:28		0.966102	00:02:51		0.953271	00:02:51
					0.779221	00:03:07		0.964286	00:03:20		0.889706	00:02:57				0.901408	00:02:12		0.940299	00:03:06		0.947368	00:03:00				0.971154	00:04:20		0.966102	00:05:45		0.953271	00:03:02
					0.792208	00:30:00		0.964286	00:30:00		0.889706	00:03:32				0.901408	00:10:08		0.955224	00:00:49		0.947368	00:02:19				0.971154	00:30:00		0.966102	00:08:45		0.953271	00:08:26
					0.792208	00:30:00		0.964286	00:01:11		0.897059	00:05:39				0.901408	00:02:15		0.955224	00:01:29		0.957895	00:01:56				0.971154	00:08:37		0.966102	00:02:31		0.962617	00:01:18
					0.792208	00:02:34		0.964286	00:02:26		0.897059	00:02:02				0.901408	00:06:58		0.955224	00:02:22		0.957895	00:03:45				0.971154	00:01:52		0.966102	00:03:51		0.962617	00:30:00
					0.792208	00:11:50		0.964286	00:00:55		0.897059	00:01:07				0.901408	00:01:52		0.955224	00:02:04		0.957895	00:30:00				0.971154	00:05:57		0.966102	00:02:58		0.962617	00:14:12
					0.792208	00:30:00		0.964286	00:01:50		0.897059	00:04:33				0.901408	00:06:52		0.955224	00:01:21		0.957895	00:05:14				0.971154	00:03:02		0.966102	00:08:27		0.962617	00:02:35
					0.792208	00:08:37		0.964286	00:03:00		0.911765	00:04:27				0.901408	00:02:05		0.955224	00:03:33		0.968421	00:01:02				0.971154	00:05:55		0.966102	00:02:20		0.971963	00:03:46
					0.792208	00:02:12		0.964286	00:02:19		0.911765	00:01:05				0.901408	00:03:51		0.955224	00:03:07		0.968421	00:01:53				0.980769	00:05:57		0.966102	00:02:18		0.971963	00:03:24
					0.792208	00:15:53		0.964286	00:01:56		0.911765	00:02:55				0.901408	00:06:10		0.955224	00:03:07		0.968421	00:05:02				0.980769	00:04:52		0.966102	00:03:38		0.971963	00:07:26
					0.792208	00:02:20		0.964286	00:03:45		0.919118	00:00:47				0.901408	00:02:44		0.955224	00:03:15		0.968421	00:06:49				0.980769	00:03:41		0.966102	00:06:54		0.971963	00:03:20
					0.792208	00:30:00		0.964286	00:30:00		0.919118	00:05:54				0.901408	00:04:53		0.955224	00:01:57		0.968421	00:01:23				0.980769	00:02:54		0.966102	00:04:00		0.971963	00:00:55
					0.792208	00:06:57		0.964286	00:05:14		0.919118	00:05:56				0.901408	00:06:18		0.955224	00:03:14		0.968421	00:02:28				0.980769	00:05:52		0.966102	00:07:47		0.971963	00:02:26
					0.792208	00:03:00		0.964286	00:01:50		0.919118	00:02:27				0.901408	00:30:00		0.955224	00:07:18		0.968421	00:01:11				0.980769	00:09:10		0.966102	00:01:16		0.971963	00:03:06
						00:03:28			00:03:22			00:01:56					00:02:00			00:03:37			00:10:14					00:02:54			00:02:12			00:03:00
						00:05:40			00:04:29			00:01:34					00:30:00			00:02:03			00:04:52					00:06:42			00:05:00			00:01:55
						00:03:54			00:03:02			00:01:09					00:04:30			00:02:53			00:01:29					00:08:57			00:04:51			00:30:00
						00:30:00			00:02:50			00:03:31					00:06:08			00:18:18			00:01:56					00:01:40			00:06:04			00:01:50
						00:02:33			00:03:28			00:05:32					00:03:06			00:02:22			00:04:09					00:08:42			00:30:00			00:03:45
						00:30:00			00:03:43			00:04:18					00:06:02			00:08:45			00:02:19					00:02:00			00:02:40			00:06:03
						00:08:36			00:01:17			00:02:26					00:07:25			00:02:47			00:01:55					00:12:01			00:00:52			00:03:22
						00:07:53			00:02:26			00:06:40					00:08:29			00:03:16			00:03:22					00:02:40			00:01:41			00:02:15
						00:06:06			00:07:13			00:06:13					00:11:48			00:03:25			00:04:29					00:06:41			00:03:35			00:06:49
						00:30:00			00:03:55			00:04:15					00:30:00			00:01:51			00:03:24					00:08:22			00:03:39			00:09:50
						00:10:46			00:01:14			00:30:00					00:07:10			00:07:20			00:12:07					00:01:18			00:08:47			00:03:05
						00:30:00			00:02:35			00:04:28					00:06:22			00:02:03			00:03:30					00:03:35			00:04:25			00:09:42
						00:06:35			00:01:18			00:02:22					00:06:23			00:01:54			00:04:19					00:03:39			00:01:05			00:02:35
						00:16:12			00:04:00			00:02:34					00:06:11			00:01:14			00:05:15					00:05:09			00:02:40			00:03:45
						00:06:07			00:03:00			00:01:22					00:09:33			00:02:29			00:02:06					00:06:08			00:05:27			00:00:55
						00:05:11			00:03:36			00:06:50					00:09:05			00:07:20			00:03:51					00:02:51			00:02:46			00:04:35
						00:30:00			00:03:06			00:23:01					00:02:51			00:01:28			00:02:26					00:03:13			00:03:56			00:07:52
						00:09:33			00:03:00			00:02:22					00:07:42			00:03:35			00:00:55					00:01:05			00:01:50			00:02:13
						00:02:25			00:02:19			00:30:00					00:04:50			00:03:58			00:01:17					00:02:44			00:04:20			00:06:08
						00:08:53			00:01:55			00:09:25					00:03:43			00:14:13			00:04:49					00:03:20			00:01:13			00:03:36
						00:03:33			00:03:45			00:06:50					00:03:23			00:06:49			00:03:19					00:05:06			00:03:04			00:01:11
						00:07:10			00:30:00			00:05:26					00:02:02			00:03:23			00:04:42					00:10:32			00:03:35			00:04:48
						00:01:02			00:05:15			00:06:41					00:06:42			00:30:00			00:03:45					00:01:40			00:03:36			00:02:37
						00:09:41			00:10:14			00:30:00					00:02:17			00:17:19			00:07:35					00:02:20			00:04:55			00:01:29
						00:15:18			00:03:22			00:30:00					00:06:09			00:02:56			00:03:45					00:04:26			00:04:07			00:08:43
						00:06:07			00:04:29			00:02:36					00:02:54			00:02:10			00:02:08					00:14:28			00:03:06			00:13:44
						00:09:14			00:03:02			00:05:04					00:09:45			00:03:19			00:19:27					00:07:45			00:02:53			00:03:00
						00:05:20			00:02:51			00:03:24					00:04:30			00:07:25			00:05:35					00:07:43			00:01:55			00:04:09
						00:02:43			00:03:30			00:09:53					00:09:03			00:06:32			00:02:37					00:04:58			00:12:13			00:08:58
						00:02:40			00:04:33			00:03:14					00:15:08			00:03:17			00:09:54					00:04:08			00:07:18			00:12:07
						00:01:58			00:07:35			00:02:44					00:03:42			00:03:35			00:07:26					00:07:58			00:03:48			00:01:53
						00:05:13			00:14:12			00:03:40					00:07:58			00:06:57			00:01:50					00:04:04			00:07:58			00:30:00
						00:30:00			00:11:14			00:04:53					00:03:23			00:16:04			00:23:33					00:08:23			00:01:31			00:05:15
						00:30:00			00:06:03			00:04:32					00:06:48			00:13:50			00:08:42					00:01:57			00:01:00			00:03:19
						00:30:00			00:03:19			00:08:55					00:01:48						00:05:42					00:03:30			00:02:03			00:05:14
						00:02:24			00:01:17			00:05:25					00:04:50						00:04:35					00:08:40			00:07:32			00:01:23
						00:30:00			00:04:49			00:04:37					00:02:51						00:03:19					00:05:09			00:03:15			00:04:49
						00:01:29			00:08:42			00:06:02					00:03:35						00:05:33					00:04:06			00:03:46			00:04:29
						00:02:53			00:03:45			00:04:24					00:04:25						00:02:07					00:08:08			00:02:37			00:05:02
						00:03:12			00:07:52			00:01:53					00:02:48						00:02:40					00:06:33			00:01:07			00:02:51
						00:02:00			00:08:26			00:02:18											00:02:51					00:01:24			00:08:45			00:04:29
						00:01:49			00:04:33			00:15:22											00:08:58					00:01:00			00:01:38			00:02:40
						00:03:45			00:07:36			00:30:00											00:02:51					00:02:12			00:02:08			00:02:07
						00:04:25			00:08:46			00:03:55											00:02:35					00:01:25			00:01:34			00:02:13
						00:03:42			00:13:44			00:06:46											00:06:03					00:02:57			00:02:31			00:05:42
						00:30:00			00:06:04			00:12:17											00:04:33					00:03:32			00:05:00			00:04:35
									00:09:50			00:03:25											00:03:05					00:05:12			00:03:17			00:07:36
									00:09:42			00:04:58											00:06:08					00:04:06			00:09:05			00:02:26
									00:04:48			00:07:12											00:01:17					00:06:34			00:06:05			00:03:55
									00:08:43			00:05:34											00:06:02					00:02:35			00:04:39			00:07:13
									00:09:54			00:05:30											00:07:52					00:10:33			00:01:43			00:05:35
									00:06:02			00:03:43											00:11:14					00:03:35			00:05:25			00:10:14
									00:06:49			00:05:27											00:03:02					00:05:37			00:03:09			00:11:14
												00:05:38											00:02:13					00:01:49			00:04:29			00:06:02
												00:07:40											00:08:26					00:04:11			00:02:12			00:04:19
												00:05:00											00:02:21					00:02:23			00:06:09			00:01:56
												00:06:35											00:30:00					00:10:46			00:03:40			00:04:42
												00:05:26											00:06:02					00:04:13			00:02:29			00:01:17
												00:30:00											00:30:00					00:01:44			00:02:58			00:04:00
												00:26:26											00:14:12					00:04:00			00:01:39			00:03:06
												00:06:24											00:02:15					00:04:15			00:02:53			00:03:51
												00:30:00											00:02:13					00:02:00			00:14:12			00:23:33
												00:06:26											00:03:00					00:14:04			00:08:06			00:06:04
												00:23:46											00:03:06					00:02:24			00:01:54			00:02:06
												00:04:34																00:04:10			00:03:35			00:03:28
												00:05:09																00:06:02			00:01:46			00:02:19
												00:05:41																00:00:45			00:07:36			00:03:45
												00:14:45																00:07:10			00:10:24			00:08:42
												00:07:00																00:01:12			00:03:00			00:03:19
												00:04:20																00:02:48			00:01:29			00:03:22
												00:06:29																00:02:38			00:03:35			00:07:35
												00:07:24																00:06:39			00:04:21			00:04:33
												00:07:43																00:05:13			00:04:10			00:03:45
												00:07:43																			00:01:02			00:01:56
												00:09:25																			00:05:29			00:03:00
												00:11:00																			00:06:40			00:01:02
												00:04:53																			00:03:17
												00:07:50																			00:03:30
												00:04:20																			00:01:24
												00:06:57																			00:02:53
												00:04:42																			00:09:32
												00:06:02																			00:30:00
												00:04:00																			00:04:05
												00:30:00																			00:03:28
												00:30:00																			00:03:39
												00:19:47																			00:05:15
												00:02:07																			00:03:23
												00:10:18
												00:03:04
												00:09:11
												00:13:41
												00:30:00
												00:06:15
												00:30:00
												00:04:50
												00:04:04
												00:04:28
												00:03:36
												00:07:19
												00:03:35
												00:06:01
												00:06:49
												00:08:46
												00:03:40
												00:04:33
