# Supplementary material for: Drosulfakinin signaling modulates female sexual receptivity in Drosophila
Source: eLife. 2022 Apr 27;11:e76025. doi: 10.7554/eLife.76025 (PMC9045819; doi:10.7554/eLife.76025)
Supplement: Figure 1—figure supplement 4—source data 1. [file elife-76025-fig1-figsupp4-data1.xlsx]

## Sheet: Sheet1
Figure 1-figure supplement 4A								Figure 1-figure supplement 4B
	Mean velocity(mm/s)		Mean velocity(mm/s)		Mean velocity(mm/s)				Mean velocity(mm/s)		Mean velocity(mm/s)		Mean velocity(mm/s)
ΔDsk/ΔDsk	0.879152	+/ΔDsk	1.73604	﹢/﹢	1.1673			elavGal4/﹢;UAS-dcr2/﹢;UAS-DskNAi/﹢	1.56241	elavGal4/﹢;UAS-dcr2/﹢;﹢/﹢	1.55008	﹢/﹢;﹢/﹢;UAS-DskNAi/﹢	1.31764
	1.53032		1.71986		1.71916				1.36907		1.58424		1.06573
	1.31236		1.11039		1.54693				1.68759		1.24265		1.36476
	1.66989		2.04478		1.22219				1.66266		1.74365		1.30544
	1.83467		2.37891		1.34469				2.15766		2.21555		1.70911
	1.46254		1.43262		1.05671				1.52561		2.23297		1.10443
	1.94349		1.89539		1.74208				1.23322		1.89729		1.21689
	1.43025		0.919356		1.83763				1.75744		1.73352		1.75726
	1.04294		2.10826		1.19087				1.19335		1.40554		1.66048
	1.48266		1.43549		2.24122				1.73267		1.57619		1.65726
	1.09165		1.23386		0.667015				1.58708		1.76485		1.70911
	1.31087		1.75725		1.37874				1.62739		1.48564		1.36476
