# Supplementary material for: Drosulfakinin signaling modulates female sexual receptivity in Drosophila
Source: eLife. 2022 Apr 27;11:e76025. doi: 10.7554/eLife.76025 (PMC9045819; doi:10.7554/eLife.76025)
Supplement: Figure 1—figure supplement 5—source data 1. [file elife-76025-fig1-figsupp5-data1.xlsx]

## Sheet: Sheet1
Figure 1-figure supplement 5A							Figure 1-figure supplement 5B
	Courtship index(%)		Courtship index(%)		Courtship index(%)			Courtship latency(sec)		Courtship latency(sec)		Courtship latency(sec)
﹢/﹢	59.531	+/ΔDsk	63.0803	ΔDsk/ΔDsk	89.1872		﹢/﹢	189	+/ΔDsk	100	ΔDsk/ΔDsk	37
	99.9912		91.0343		92.6835			0		26		4
	90.0963		81.0828		86.5377			3		5		1
	95.4853		75.9458		91.7352			0		59		37
	81.2157		88.4583		74.545			12		33		6
	87.1882		70.2822		99.2193			2		5		1
	81.0963		75.999		91.6605			6		43		2
	94.3482		76.248		85.6357			42		5		8
	52.9732		74.6265		83.3295			21		69		4
	41.8008		58.291		89.8542			14		23		50
	83.7263		85.8038		47.0235			3		23		9
	82.5118		93.4203		86.9092			33		22		3
	94.8497		68.5753		78.0792			8		66		0
	59.7617		77.8778		86.3355			14		7		6
	93.0697		99.8508		60.771			0		0		4
	79.5623		83.0547		78.996			9		14		5
	76.2208		95.7438		69.4678			3		4		23
	61.3463		97.8118		92.0007			78		0		3
	80.8535		88.8238		56.4063			26		14		45
	88.3775		67.8747		89.9798			43		2		15
	77.2898		88.3422		68.8103			0		1		5
	81.0682		93.3663		98.2392			5		1		7
	82.7993		83.7677		95.75			4		10		28
	90.0822		62.0813		92.4768			4		55		3
	84.775		95.749		73.3317			1		1		7
	90.7873		82.3675		73.983			0		10		20
	87.5038		85.621		89.3702			23		1		10
	78.2595		66.7417		99.9498			22		15		0
	81.3748		45.6615		32.4793			5		29		34
	95.7902		74.8158		78.5547			0		23		5
	62.9185		62.249		68.9975			33		1		2
	88.7907		87.6443		79.1922			16		55		12
			58.8228		87.264					23		10
			83.1212		96.6608					6		15
