# Supplementary material for: Drosulfakinin signaling modulates female sexual receptivity in Drosophila
Source: eLife. 2022 Apr 27;11:e76025. doi: 10.7554/eLife.76025 (PMC9045819; doi:10.7554/eLife.76025)
Supplement: Figure 1—figure supplement 6—source data 1. [file elife-76025-fig1-figsupp6-data1.xlsx]

## Sheet: Sheet1
Figure 1-figure supplement6 A										Figure 1-figure supplement 6C
egg laying										TRIC signals
ΔDsk/ΔDsk	1-day	2-day	3-day		elavGal4/﹢;UAS-dcr2/﹢;UAS-DskNAi/﹢	1-day	2-day	3-day		virgin	0.663675	mated	0.374117
	0	0	100			0	4	25			0.967115		0.422826
	0	22	60			0	0	6			0.425855		0.680422
	9	16	32			0	0	20			0.509881		0.705351
	4	41	8			0	2	3			0.445115		0.404573
	2	7	80			0	0	10			0.392583		0.409144
	15	6	35			0	0	8			0.483032		0.474738
	0	20	65			0	2	12			0.933678		0.54953
	6	58	93			0	0	2			0.738603		0.672025
	0	7	79			0	0	3			0.44789		0.406785
	0	8	77			0	2	0			0.34137		0.420621
	0	55	110			0	0	0			0.438896		0.493848
	4	5	6								0.404477		0.426199
													0.273367
													0.402913
+/ΔDsk	1-day	2-day	3-day		elavGal4/﹢;UAS-dcr2/﹢;﹢/﹢	1-day	2-day	3-day
	0	10	58			0	0	0
	1	0	76			0	0	2
	0	0	65			0	0	6
	0	0	54			0	0	2
	0	0	47			0	0	1
	0	0	46			0	2	5
	0	3	46			0	4	10
	0	59	50			0	3	15
	0	28	39			0	0	6
	0	0	33			0	0	3
	0	8	70			0	0	22
	0	0	121
	18	9	51
﹢/﹢	1-day	2-day	3-day		﹢/﹢;﹢/﹢;UAS-DskNAi/﹢	1-day	2-day	3-day
	13	1	16			0	1	0
	31	6	12			0	0	4
	0	2	7			0	4	0
	1	2	6			0	1	0
	0	26	15			0	0	22
	9	2	77			0	0	55
	5	0	31			0	0	0
	2	0	31			0	0	0
	35	1	120			0	0	0
	11	0	10			0	0	2
	0	28	2
	0	5	80
	0	0	120
	35	1	120
