# Supplementary material for: Drosulfakinin signaling modulates female sexual receptivity in Drosophila
Source: eLife. 2022 Apr 27;11:e76025. doi: 10.7554/eLife.76025 (PMC9045819; doi:10.7554/eLife.76025)
Supplement: Figure 1—figure supplement 7—source data 1. [file elife-76025-fig1-figsupp7-data1.xlsx]

## Sheet: Sheet1
Figure 1-figure supplement 7A							Figure 1-figure supplement 7B
Genotpe	Copulation rate	StartTime	Genotpe	Copulation rate	StartTime		Genotpe	Copulation rate	StartTime	Genotpe	Copulation rate	StartTime
elav-GS/+ RU486+	0	00:01:24	elav-GS/+ RU486﹣	0	00:01:33		UAS-Dsk/+ RU486﹢	0	00:03:01	UAS-Dsk/+ RU486﹣	0	00:02:56
	0.084507	00:02:30		0.0714286	00:01:56			0.0070922	00:02:15		0.0425532	00:04:50
	0.253521	00:03:18		0.307143	00:06:28			0.148936	00:04:40		0.191489	00:01:00
	0.521127	00:02:40		0.521429	00:01:18			0.375887	00:06:03		0.41844	00:03:00
	0.71831	00:00:45		0.65	00:01:35			0.503546	00:08:16		0.546099	00:02:37
	0.802817	00:01:45		0.8	00:04:39			0.58156	00:01:55		0.702128	00:00:47
	0.838028	00:00:53		0.828571	00:12:37			0.64539	00:08:33		0.758865	00:02:37
	0.873239	00:03:39		0.9	00:04:05			0.716312	00:02:11		0.801418	00:04:10
	0.887324	00:01:36		0.921429	00:05:49			0.77305	00:05:44		0.836879	00:01:28
	0.908451	00:03:00		0.95	00:01:18			0.808511	00:02:13		0.858156	00:01:55
	0.922535	00:02:53		0.957143	00:06:52			0.829787	00:11:49		0.858156	00:01:24
	0.93662	00:03:16		0.957143	00:02:00			0.843972	00:04:19		0.886525	00:04:44
	0.943662	00:01:04		0.957143	00:01:36			0.87234	00:09:31		0.907801	00:01:02
	0.943662	00:01:19		0.964286	00:01:47			0.879433	00:04:12		0.921986	00:18:55
	0.943662	00:02:51		0.964286	00:18:04			0.907801	00:01:58		0.921986	00:02:45
	0.950704	00:02:14		0.964286	00:03:23			0.907801	00:09:13		0.929078	00:03:35
	0.957746	00:00:43		0.964286	00:03:18			0.914894	00:02:32		0.929078	00:02:17
	0.957746	00:02:31		0.964286	00:07:28			0.914894	00:01:38		0.929078	00:04:33
	0.957746	00:03:23		0.964286	00:04:26			0.929078	00:05:14		0.93617	00:10:24
	0.957746	00:01:43		0.971429	00:01:46			0.943262	00:03:20		0.943262	00:02:30
	0.957746	00:01:16		0.978571	00:04:33			0.943262	00:05:19		0.943262	00:03:21
	0.957746	00:03:03		0.978571	00:06:31			0.943262	00:02:23		0.957447	00:05:14
	0.957746	00:04:02		0.978571	00:06:48			0.943262	00:03:18		0.957447	00:04:38
	0.957746	00:02:24		0.978571	00:03:00			0.950355	00:01:05		0.964539	00:04:58
	0.957746	00:14:44		0.978571	00:01:14			0.950355	00:06:03		0.971631	00:07:07
	0.957746	00:01:32		0.978571	00:01:37			0.950355	00:06:13		0.971631	00:02:00
	0.957746	00:03:00		0.978571	00:03:52			0.950355	00:15:40		0.971631	00:04:58
	0.957746	00:03:57		0.978571	00:04:22			0.950355	00:10:12		0.971631	00:07:51
	0.957746	00:03:24		0.978571	00:01:38			0.950355	00:01:30		0.971631	00:17:31
	0.957746	00:15:12		0.978571	00:02:27			0.950355	00:04:45		0.971631	00:10:47
	0.957746	00:04:07		0.978571	00:03:41			0.950355	00:01:58		0.971631	00:12:00
		00:06:54			00:01:58				00:07:24			00:03:11
		00:04:23			00:06:53				00:08:42			00:03:34
		00:03:11			00:01:35				00:30:00			00:07:22
		00:30:00			00:01:44				00:06:31			00:03:34
		00:03:17			00:02:34				00:01:17			00:03:42
		00:02:04			00:03:00				00:03:34			00:03:37
		00:02:09			00:30:00				00:02:51			00:30:00
		00:03:42			00:04:19				00:02:36			00:10:51
		00:02:37			00:02:38				00:01:30			00:30:00
		00:00:55			00:01:36				00:01:26			00:02:32
		00:02:22			00:03:22				00:02:41			00:06:14
		00:08:01			00:03:00				00:11:26			00:02:28
		00:10:16			00:02:48				00:17:56			00:06:17
		00:01:53			00:01:26				00:02:40			00:02:47
		00:00:55			00:05:06				00:02:42			00:03:49
		00:02:40			00:01:46				00:03:39			00:06:11
		00:02:22			00:02:28				00:02:46			00:02:09
		00:01:26			00:03:07				00:08:22			00:01:46
		00:05:00			00:30:00				00:07:06			00:04:27
		00:03:39			00:03:55				00:06:35			00:05:30
		00:03:49			00:04:42				00:11:32			00:01:14
		00:05:08			00:01:09				00:02:12			00:14:53
		00:05:40			00:02:12				00:09:46			00:12:00
		00:01:04			00:01:28				00:02:18			00:02:25
		00:05:08			00:03:17				00:03:04			00:02:23
		00:02:39			00:04:14				00:05:36			00:20:37
		00:30:00			00:30:00				00:04:40			00:02:53
		00:08:20			00:02:13				00:22:00			00:02:04
		00:05:41			00:02:15				00:30:00			00:06:20
		00:03:35			00:01:00				00:13:49			00:03:35
		00:06:17			00:01:35				00:01:48			00:00:41
		00:03:39			00:02:03				00:03:10			00:23:00
		00:04:00			00:01:05				00:04:43			00:10:31
		00:03:16			00:03:14				00:03:44			00:04:31
		00:02:26			00:01:35				00:02:11			00:02:02
		00:02:22			00:02:02				00:02:31			00:00:56
		00:02:19			00:00:50				00:13:53			00:07:16
		00:00:42			00:04:05				00:02:06			00:04:06
		00:10:22			00:09:12				00:04:39			00:08:59
		00:03:35			00:04:01				00:02:48			00:05:59
		00:02:43			00:01:44				00:01:43			00:02:41
		00:00:57			00:02:56				00:06:11			00:05:40
		00:03:12			00:02:06				00:03:20			00:03:28
		00:03:40			00:08:30				00:01:32			00:01:14
		00:10:00			00:08:36				00:06:38			00:04:16
		00:02:47			00:01:23				00:02:56			00:04:23
		00:04:02			00:00:49				00:02:59			00:04:45
		00:02:28			00:03:13				00:02:43			00:03:07
		00:03:18			00:06:26				00:02:37			00:04:26
		00:04:46			00:04:18				00:03:42			00:02:56
		00:01:38			00:06:48				00:02:31			00:03:01
		00:02:35			00:03:41				00:06:15			00:02:12
		00:02:28			00:05:49				00:06:58			00:30:00
		00:06:00			00:01:09				00:02:23			00:01:12
		00:02:29			00:02:24				00:11:47			00:01:01
		00:09:29			00:02:38				00:06:04			00:03:58
		00:07:05			00:03:00				00:18:27			00:30:00
		00:02:23			00:04:26				00:13:13			00:08:38
		00:30:00			00:04:01				00:07:44			00:02:05
		00:03:37			00:06:48				00:08:53			00:03:52
		00:03:31			00:07:39				00:02:58			00:11:56
		00:06:05			00:04:32				00:04:04			00:02:29
		00:03:40			00:03:09				00:07:33			00:01:34
		00:11:18			00:01:46				00:05:53			00:02:38
		00:01:45			00:03:44				00:02:30			00:02:49
		00:01:16			00:04:13				00:02:39			00:08:16
		00:03:05			00:04:08				00:02:22			00:03:48
		00:01:26			00:05:34				00:03:04			00:07:18
		00:01:56			00:04:57				00:05:09			00:02:16
		00:02:57			00:04:25				00:17:50			00:05:00
		00:03:10			00:03:49				00:01:00			00:02:34
		00:30:00			00:02:30				00:02:39			00:04:51
		00:02:42			00:02:56				00:01:21			00:23:38
		00:00:44			00:06:34				00:10:23			00:03:16
		00:02:51			00:03:04				00:05:08			00:05:36
		00:07:08			00:19:12				00:13:00			00:01:44
		00:04:02			00:01:49				00:05:06			00:12:12
		00:02:35			00:08:17				00:30:00			00:02:18
		00:00:43			00:06:42				00:18:28			00:01:47
		00:06:39			00:00:45				00:03:13			00:02:46
		00:02:21			00:03:16				00:07:02			00:01:56
		00:08:15			00:02:17				00:03:43			00:02:43
		00:02:03			00:02:48				00:30:00			00:02:50
		00:00:58			00:00:30				00:07:30			00:01:50
		00:01:33			00:01:18				00:03:15			00:02:19
		00:30:00			00:01:00				00:03:28			00:01:19
		00:02:13			00:00:51				00:30:00			00:01:55
		00:02:10			00:01:00				00:30:00			00:03:12
		00:04:41			00:02:03				00:02:16			00:01:45
		00:30:00			00:04:53				00:01:29			00:00:49
		00:03:27			00:01:50				00:01:20			00:01:03
		00:04:02			00:02:22				00:04:33			00:00:56
		00:05:25			00:02:08				00:03:51			00:01:21
		00:03:20			00:01:00				00:01:26			00:03:05
		00:01:46			00:02:25				00:01:13			00:04:16
		00:04:21			00:01:12				00:03:03			00:20:25
		00:02:39			00:03:39				00:01:43			00:04:11
		00:02:39			00:04:34				00:01:42			00:12:11
		00:03:13			00:01:24				00:02:22			00:02:32
		00:01:27			00:00:52				00:07:37			00:06:04
		00:02:15			00:01:19				00:30:00			00:04:12
		00:01:02			00:02:27				00:02:47			00:06:39
		00:03:54			00:03:18				00:07:37			00:04:34
		00:00:24			00:02:10				00:04:33			00:05:09
		00:01:31			00:04:25				00:03:40			00:01:06
		00:04:25			00:01:18				00:01:44			00:01:31
		00:00:48			00:07:37				00:12:10			00:04:55
		00:01:28			00:08:16				00:05:14			00:05:10
		00:02:13			00:02:34				00:02:29			00:04:16
		00:01:57							00:04:24			00:05:03
		00:01:54
