# Supplementary material for: Drosulfakinin signaling modulates female sexual receptivity in Drosophila
Source: eLife. 2022 Apr 27;11:e76025. doi: 10.7554/eLife.76025 (PMC9045819; doi:10.7554/eLife.76025)
Supplement: Figure 1—source data 1. [file elife-76025-fig1-data1.xlsx]

## Sheet: Sheet1
					Figure 1E-F										Figure 1H							Figure 1I										Figure 1J
Figure 1B
					Genotpe	Copulation rate	StartTime	Genotpe	Copulation rate	StartTime	Genotpe	Copulation rate	StartTime		Genotpe	Copulation rate	StartTime	Genotpe	Copulation rate	StartTime		Genotpe	Copulation rate	StartTime	Genotpe	Copulation rate	StartTime	Genotpe	Copulation rate	StartTime		Genotpe	Copulation rate	StartTime	Genotpe	Copulation rate	StartTime	Genotpe	Copulation rate	StartTime
					ΔDsk/ΔDsk	0	0:30:00	﹢/﹢	0	00:02:58	+/ΔDsk	0	00:01:50		UAS-Dsk/+;elav-GS/+ RU486+	0	00:03:20	UAS-Dsk/+;elav-GS/+ RU486-	0	00:25:47		DskGAL4/UAS-Dsk	0	00:03:44	DskGAL4/+	0	0:30:00	UAS-Dsk/+	0	00:18:39		elavGAL4/+;UAS-Dsk/+;ΔDsk/ΔDsk	0	00:05:03	﹢/﹢;UAS-Dsk/UAS-Dsk;ΔDsk/ΔDsk	0	00:10:36	elavGAL4/+	0	00:05:36
						0.0125	00:18:58		0.0416667	00:01:58		0	00:03:09			0.00735294	00:04:10		0.0283688	00:08:45			0.0190476	00:02:45		0	00:06:36		0.010989	0:30:00			0	00:04:38		0	00:07:09		0	00:02:55
						0.15625	0:30:00		0.202381	00:03:12		0.0916667	00:01:42			0.154412	00:01:18		0.148936	00:07:05			0.180952	00:02:51		0.0537634	00:07:20		0.0879121	00:08:34			0.0222222	00:04:36		0.0186916	00:09:22		0.0666667	00:03:05
						0.3125	0:30:00		0.416667	00:04:48		0.241667	00:04:01			0.367647	00:03:57		0.312057	00:05:54			0.428571	00:01:39		0.225806	00:03:13		0.186813	00:05:24			0.0666667	00:11:44		0.0373832	0:30:00		0.183333	00:02:15
						0.38125	00:04:11		0.553571	00:05:40		0.416667	00:08:50			0.558824	00:05:45		0.425532	00:03:05			0.619048	00:02:46		0.397849	00:04:13		0.340659	00:15:12			0.188889	00:05:12		0.0654206	00:18:18		0.283333	00:16:29
						0.4625	00:08:22		0.625	00:03:23		0.491667	00:01:32			0.691176	00:04:40		0.539007	00:06:44			0.8	00:04:10		0.505376	00:09:42		0.450549	00:04:11			0.344444	00:12:29		0.0934579	00:07:44		0.333333	00:02:48
						0.5375	0:30:00		0.708333	00:02:27		0.6	00:03:31			0.764706	00:03:12		0.624113	00:09:03			0.87619	00:02:06		0.623656	00:07:47		0.571429	00:03:50			0.422222	00:07:52		0.130841	00:20:13		0.416667	00:08:59
						0.55625	00:09:21		0.77381	00:01:28		0.666667	00:08:07			0.801471	00:04:22		0.64539	00:09:23			0.933333	00:03:01		0.72043	00:03:00		0.604396	00:08:13			0.522222	00:03:10		0.196262	00:16:48		0.45	00:05:22
						0.5625	00:19:35		0.797619	00:03:39		0.708333	00:02:34			0.838235	00:01:50		0.652482	00:08:21			0.961905	00:03:05		0.741935	00:02:36		0.626374	00:04:12			0.611111	00:06:07		0.28972	00:09:02		0.516667	00:06:12
						0.58125	0:30:00		0.815476	0:30:00		0.775	00:05:50			0.860294	00:03:16		0.680851	00:04:07			0.980952	00:03:25		0.752688	00:03:20		0.725275	00:05:03			0.666667	00:03:20		0.345794	00:06:32		0.583333	00:09:00
			1	﹢/﹢		0.6	0:30:00		0.827381	00:05:22		0.783333	00:02:36			0.882353	00:02:33		0.702128	00:05:25			0.980952	00:01:56		0.784946	00:10:17		0.758242	00:04:55			0.711111	00:01:57		0.411215	0:30:00		0.666667	00:04:55
			2	+/ΔDsk		0.60625	0:30:00		0.839286	00:01:00		0.808333	00:02:18			0.933824	00:09:25		0.716312	00:03:22			0.980952	00:04:56		0.827957	00:11:13		0.769231	00:18:54			0.733333	00:04:08		0.457944	0:30:00		0.716667	00:02:10
			3	ΔDsk/ΔDsk		0.6125	00:26:00		0.85119	00:01:00		0.825	00:03:05			0.933824	00:12:06		0.723404	0:30:00			0.980952	00:05:00		0.849462	00:06:46		0.791209	00:03:04			0.744444	00:12:16		0.523364	0:30:00		0.75	00:08:17
						0.625	00:02:59		0.857143	00:04:25		0.825	00:02:12			0.955882	00:04:27		0.730496	0:30:00			0.990476	00:04:00		0.849462	00:06:30		0.791209	00:08:04			0.788889	00:06:40		0.53271	0:30:00		0.75	00:09:32
						0.625	00:08:46		0.863095	00:01:26		0.825	00:04:37			0.970588	00:07:26		0.744681	0:30:00			0.990476	00:02:23		0.870968	0:30:00		0.791209	00:04:15			0.8	00:08:17		0.542056	00:11:40		0.766667	00:07:21
						0.625	00:09:05		0.869048	00:03:03		0.833333	00:02:10			0.970588	00:03:16		0.744681	00:10:05			0.990476	00:02:01		0.88172	00:14:00		0.835165	00:01:47			0.8	00:04:03		0.551402	0:30:00		0.816667	00:01:08
						0.625	0:30:00		0.869048	00:02:36		0.841667	00:01:04			0.970588	00:05:59		0.744681	0:30:00			0.990476	00:04:04		0.88172	00:02:02		0.846154	00:02:47			0.833333	00:03:47		0.579439	00:18:19		0.816667	0:30:00
						0.625	00:05:10		0.875	00:01:42		0.841667	00:05:32			0.970588	00:04:54		0.744681	00:05:09			0.990476	00:01:23		0.892473	00:05:08		0.857143	00:18:04			0.833333	00:10:22		0.598131	00:15:49		0.833333	0:30:00
						0.6375	00:02:19		0.875	00:01:52		0.875	00:03:36			0.977941	00:12:15		0.744681	0:30:00			0.990476	00:02:25		0.892473	0:30:00		0.879121	00:02:40			0.833333	00:08:10		0.626168	0:30:00		0.833333	00:01:47
						0.65	00:06:00		0.875	00:03:28		0.883333	00:02:40			0.977941	00:01:14		0.744681	00:01:19			0.990476	00:03:13		0.913978	00:06:05		0.912088	0:30:00			0.833333	0:30:00		0.64486	0:30:00		0.833333	00:03:32
Figure 1C						0.65625	0:30:00		0.875	00:07:33		0.883333	00:05:12			0.977941	00:02:07		0.744681	00:03:10			0.990476	00:00:50		0.913978	00:05:14		0.912088	00:02:20			0.855556	0:30:00		0.654206	00:11:01		0.833333	0:30:00
						0.65625	00:24:06		0.875	00:02:54		0.883333	00:02:55			0.977941	00:03:19		0.744681	00:05:14			1	00:03:27		0.913978	0:30:00		0.912088	00:09:23			0.855556	00:05:27		0.672897	00:05:16		0.833333	00:03:26
						0.65625	00:17:52		0.880952	00:01:58		0.883333	00:03:50			0.977941	00:02:53		0.744681	00:08:23			1	00:01:29		0.913978	00:03:05		0.912088	00:03:05			0.855556	00:06:12		0.682243	00:11:08		0.833333	00:07:41
						0.65625	0:30:00		0.880952	00:07:25		0.891667	00:01:52			0.977941	00:02:34		0.751773	00:04:47			1	00:01:32		0.913978	00:03:00		0.934066	00:08:42			0.866667	00:10:00		0.682243	00:07:03		0.833333	00:03:10
						0.6625	00:12:36		0.880952	00:02:25		0.9	00:04:27			0.977941	00:01:24		0.758865	00:02:12			1	00:06:50		0.913978	00:11:42		0.934066	00:06:23			0.877778	00:06:37		0.691589	00:01:45		0.85	00:03:36
						0.66875	0:30:00		0.880952	00:02:05		0.9	00:03:18			0.977941	00:01:50		0.758865	00:05:03			1	00:02:05		0.913978	00:04:35		0.934066	00:22:05			0.877778	00:04:22		0.691589	0:30:00		0.85	00:14:29
						0.66875	00:11:41		0.880952	00:01:27		0.9	00:02:09			0.977941	00:04:07		0.765957	00:01:42			1	00:02:40		0.913978	00:09:48		0.934066	00:02:16			0.877778	00:04:02		0.700935	00:02:25		0.85	00:04:52
						0.68125	0:30:00		0.892857	00:03:09		0.9	00:04:46			0.977941	00:03:58		0.765957	00:04:39			1	00:05:22		0.913978	00:03:29		0.934066	00:02:04			0.877778	00:03:12		0.700935	00:19:45		0.85	00:08:22
						0.6875	00:04:50		0.892857	00:06:02		0.908333	00:05:39			0.977941	00:01:49		0.765957	00:02:29			1	00:03:02		0.913978	00:06:24		0.934066	0:30:00			0.877778	00:04:38		0.700935	0:30:00		0.85	00:14:45
						0.6875	00:02:01		0.892857	00:01:50		0.908333	00:01:40			0.977941	00:08:15		0.765957	00:05:24			1	00:03:00		0.913978	00:05:38		0.934066	00:03:40			0.888889	00:05:05		0.700935	0:30:00		0.85	00:11:05
						0.6875	00:03:11		0.910714	00:01:24		0.908333	00:04:58			0.977941	00:01:47		0.765957	00:03:29			1	00:02:55		0.913978	00:06:18		0.934066	00:07:31			0.9	00:07:26		0.700935	0:30:00		0.85	00:06:25
							00:02:11			00:02:02			00:05:22				00:05:39			00:03:41				00:03:32			00:10:40			00:16:09				00:06:02			00:09:08			00:07:11
							00:06:23			00:05:35			00:03:17				00:03:02			00:03:55				00:04:24			00:02:47			00:01:56				00:15:38			0:30:00			00:10:37
							00:05:07			00:05:24			00:05:22				00:02:00			00:04:48				00:04:29			0:30:00			0:30:00				0:30:00			00:10:12			00:10:31
							0:30:00			00:01:33			00:01:35				00:05:39			0:30:00				00:03:11			00:02:37			00:14:28				00:10:00			00:17:02			0:30:00
							00:03:16			00:02:30			00:03:54				00:05:42			0:30:00				00:01:45			00:02:50			00:03:41				00:03:25			00:08:39			0:30:00
							0:30:00			00:02:01			00:03:31				00:04:32			0:30:00				00:04:25			00:09:36			00:05:15				00:13:37			0:30:00			0:30:00
							00:17:00			00:01:08			00:03:17				00:03:07			00:02:35				00:02:56			0:30:00			00:05:47				00:09:39			0:30:00			00:13:16
							00:09:06			00:08:47			00:03:34				00:04:44			00:03:48				00:05:06			00:04:39			0:30:00				00:07:22			00:25:40			00:13:16
							0:30:00			00:02:17			00:06:16				00:02:38			0:30:00				00:01:01			00:05:26			00:02:42				00:09:52			00:05:45			00:02:29
							00:02:58			00:03:45			00:04:45				00:02:03			00:01:45				00:03:57			00:06:31			00:03:01				00:12:16			00:04:09			00:05:13
							0:30:00			00:02:47			00:03:53				00:04:42			00:04:17				00:03:17			00:13:04			00:08:25				00:15:32			00:09:34			00:09:52
							00:01:58			00:03:31			00:06:15				00:04:12			00:05:15				00:00:42			0:30:00			00:03:40				00:04:42			0:30:00			00:05:24
							0:30:00			00:03:28			00:07:36				00:03:09			00:05:02				00:01:42			00:04:55			00:08:12				00:05:56			00:15:44			00:08:15
							00:01:07			00:04:38			0:30:00				00:02:47			00:00:52				00:01:48			00:14:38			00:02:41				00:15:41			00:03:56			0:30:00
							00:05:28			00:04:47			00:02:33				00:01:51			00:04:00				00:02:25			00:18:46			00:17:52				00:04:20			0:30:00			00:01:00
							00:10:16			00:05:08			00:02:39				0:30:00			00:01:58				00:04:23			00:03:20			00:10:56				0:30:00			00:03:11			00:09:40
							0:30:00			00:02:53			0:30:00				00:05:53			00:04:57				00:02:54			00:03:17			00:08:17				0:30:00			00:20:05			00:02:34
							00:04:07			00:05:56			0:30:00				00:02:27			0:30:00				00:01:41			00:05:02			00:04:16				0:30:00			0:30:00			00:02:52
							00:02:19			00:02:23			00:05:47				00:02:35			00:04:25				00:02:40			00:03:14			00:05:58				00:28:40			00:07:34			00:14:47
							0:30:00			00:01:30			00:07:49				00:03:33			00:04:35				00:01:20			00:10:35			00:03:17				00:08:41			00:15:12			00:09:40
							0:30:00			0:30:00			00:17:57				00:10:27			0:30:00				00:05:36			00:03:15			0:30:00				00:10:36			00:02:01			00:04:44
							00:03:14			00:01:54			00:07:25				0:30:00			00:04:40				00:04:04			00:05:05			00:03:14				00:06:50			00:09:33			00:01:19
							0:30:00			00:03:14			00:02:48				00:01:35			00:08:37				00:06:38			00:04:44			00:22:52				00:06:19			00:06:20			00:23:42
							00:02:36			00:04:18			00:02:18				00:02:04			00:04:21				00:04:48			00:02:35			00:04:51				00:04:09			00:12:15			00:11:50
							00:01:56			00:05:37			00:17:21				00:03:21			00:01:53				00:04:18			00:03:55			00:11:37				00:29:37			0:30:00			0:30:00
							00:07:37			00:01:35			00:03:50				00:03:56			00:10:07				00:02:34			00:01:19			00:01:45				00:03:30			00:17:12			00:05:20
							00:12:39			00:04:38			00:04:02				00:02:51			00:02:29				00:02:42			00:10:25			00:03:22				00:07:49			0:30:00			00:07:30
							00:27:16			00:03:50			00:27:58				00:03:53			00:03:33				00:03:12			00:06:55			00:05:07				00:03:34			00:06:22			00:03:52
							00:04:44			00:30:00			00:06:54				00:02:35			00:02:15				00:04:40			00:16:15			00:04:16				00:04:10			0:30:00			0:30:00
							00:05:29			00:02:07			00:08:46				00:01:48			00:02:00				00:01:20			00:03:57			00:03:38				00:08:52			00:09:05
							0:30:00			00:02:02			00:03:38				00:03:06			00:13:20				00:01:24			00:03:31			00:00:57				00:03:32			00:05:15
							0:30:00			00:05:16			00:01:39				00:02:50			00:04:11				00:07:41			00:04:05			00:06:10				0:30:00			0:30:00
							00:04:49			00:08:32			00:05:01				00:01:40			00:03:12				00:02:55			00:05:41			00:05:43				00:02:04			00:11:29
							00:02:47			00:01:34			00:09:14				00:01:15			00:04:04				00:02:46			00:02:51			00:08:46				00:22:43			00:21:58
							0:30:00			00:05:16			00:03:36				00:01:22			00:12:48				00:01:40			00:03:37			00:05:14				00:01:49			0:30:00
							00:04:29			00:01:46			0:30:00				00:04:14			0:30:00				00:12:40			00:18:05			00:05:03				00:07:30			00:08:23
							00:05:39			00:00:48			00:07:04				00:05:08			00:01:54				00:03:01			00:05:51			00:14:56				00:02:03			00:07:40
							0:30:00			00:02:00			00:22:51				00:04:39			0:30:00				00:03:10			00:02:41			00:04:40				00:03:56			00:10:52
							00:02:41			00:02:07			00:02:29				00:06:34			00:00:49				00:01:29			00:01:57			00:02:54				00:06:52			00:08:48
							0:30:00			00:03:03			00:03:02				00:06:44			00:04:21				00:05:57			0:30:00			00:09:40				00:04:49			0:30:00
							0:30:00			0:30:00			00:02:09				00:01:00			00:02:07				00:06:50			00:04:00			00:03:05				00:03:31			00:23:02
							00:08:10			00:01:43			00:02:02				00:04:20			0:30:00				00:02:05			00:03:33			00:01:31				00:07:55			0:30:00
							00:01:50			00:02:32			00:23:20				00:04:24			00:03:35				00:02:40			00:05:15			00:02:15				00:06:31			00:13:15
							0:30:00			00:03:26			0:30:00				00:01:12			0:30:00				00:05:22			00:06:12			00:03:46				00:04:07			00:07:38
							00:03:19			00:02:00			00:04:03				00:04:35			0:30:00				00:03:02			00:02:31			00:01:09				00:23:14			00:06:18
							00:18:14			00:06:27			00:08:33				00:01:58			0:30:00				00:03:00			00:03:55			00:04:42				0:30:00			00:10:23
							00:01:30			00:03:02			00:02:42				00:02:09			00:04:29				00:02:55			00:02:27			00:04:29				0:30:00			00:07:38
							00:03:09			00:03:11			00:14:27				0:30:00			00:23:28				00:03:32			00:02:48			00:08:24				00:07:46			00:16:10
							00:04:06			00:03:11			00:02:23				00:06:38			00:03:12				00:04:24			00:05:02			00:01:12				00:02:22			00:03:41
							00:04:02			00:01:33			00:11:13				00:03:17			00:00:35				00:04:29			00:04:34			00:09:57				00:03:43			00:08:23
							00:02:52			00:01:20			00:17:52				00:02:19			00:02:05				00:07:57			00:08:45			00:05:05				00:19:40			00:01:40
							00:00:32			00:06:17			00:04:48				00:09:09			0:30:00				00:04:55			00:05:07			00:14:46				00:05:46			00:07:43
							0:30:00			00:03:13			00:01:51				00:02:42			0:30:00				00:01:55			00:01:12			00:07:18				00:07:01			00:06:27
							00:03:43			00:02:51			00:03:02				00:01:40			00:04:15				00:05:34			00:02:14			00:14:24				00:08:56			0:30:00
							00:05:13			00:02:20			00:01:52				00:03:30			00:02:10				00:02:55			00:02:26			00:05:54				00:02:32			0:30:00
							0:30:00			00:12:20			00:05:17				00:02:55			0:30:00				00:08:58			00:03:41			00:06:57				00:04:41			00:06:55
							00:03:39			00:03:32			00:15:01				00:03:14			00:01:41				00:05:04			00:05:15			00:11:52				00:12:35			00:04:20
							00:01:55			00:01:29			00:02:56				00:01:17			0:30:00				00:01:08			00:06:12			00:17:14				00:19:08			00:08:51
							0:30:00			00:01:56			0:30:00				00:02:46			0:30:00				00:02:35			00:03:33			00:03:52				00:05:26			00:17:07
							0:30:00			00:06:27			00:03:48				00:02:36			00:03:25				00:03:50			00:04:35			00:01:49							00:07:34
							0:30:00			00:02:29			00:05:26				00:02:41			00:02:12				00:04:17			00:04:18										00:04:21
							00:02:27			00:06:16			0:30:00				00:01:14			00:01:13				00:03:34			00:01:36										00:10:50
							00:01:46			00:00:57			00:01:12				00:03:27			00:06:57				00:03:29													00:06:27
							00:01:20			00:30:00			00:10:04				00:02:09			00:00:50				00:02:36													00:11:20
							00:02:25			00:02:01			00:06:00				00:08:25			00:03:16				00:05:57													0:30:00
							0:30:00			00:06:21			00:08:14				00:04:24			00:02:45				00:06:57													00:14:29
							0:30:00			0:30:00			00:06:47				00:02:08			00:01:20				00:07:41													00:08:50
							0:30:00			00:04:14			00:08:29				00:03:16			00:02:01				00:20:17													00:11:11
							00:04:53			00:00:58			00:10:25				00:10:28			00:02:47				00:03:01													00:09:25
							00:02:21			00:01:41			00:06:43				00:01:32			00:02:24				00:06:06													00:07:05
							00:23:11			0:30:00			00:03:15				00:03:15			00:01:05				00:04:38													0:30:00
							00:02:00			00:05:40			00:05:05				00:03:50			00:05:21				00:04:20													00:05:53
							0:30:00			0:30:00			0:30:00				00:10:05			00:09:23				00:06:51													00:11:28
							0:30:00			00:02:13			00:05:24				00:05:38			00:02:27				00:08:32													00:04:21
							0:30:00			00:02:25			00:06:28				00:06:01			00:01:32																	00:10:50
							00:02:23			00:21:46			00:07:30				00:02:28			00:03:21																	00:06:27
							00:26:00			00:06:15			00:06:26				00:06:12			00:02:15
							00:02:48			00:03:02			00:05:09				00:02:42			00:02:01
							00:01:58			00:00:59			00:08:45				00:03:06			00:02:28
							00:05:38			00:02:35			0:30:00				00:04:10			0:30:00
							00:01:14			00:01:36			00:03:20				00:02:18			00:01:37
							00:00:53			00:02:22			00:19:00				00:02:24			00:01:39
							00:01:31			00:01:37			00:17:30				00:07:39			00:02:35
							0:30:00			00:02:16			00:08:34				00:09:49			00:03:36
							00:01:03			0:30:00			0:30:00				00:10:15			00:02:10
							0:30:00			00:04:02			00:11:18				00:13:56			00:13:03
							00:01:53			00:01:28			00:03:59				00:04:16			0:30:00
							00:01:13			0:30:00			00:10:52				00:10:55			00:02:38
							00:02:28			00:08:02			0:30:00				00:10:28			00:01:10
							0:30:00			0:30:00							00:01:43			0:30:00
							00:06:29			00:03:53							00:02:39			00:22:01
							00:03:26			00:01:19							00:08:27			0:30:00
							00:01:53			00:04:03							00:12:19			0:30:00
							00:02:08			00:02:27							00:03:40			00:06:10
							00:02:16			00:05:12							00:07:17			00:05:17
							00:03:19			00:05:27							00:05:55			00:11:29
							00:01:38			00:02:54							00:07:34			00:01:52
							00:04:11			00:02:18							00:02:36			00:01:33
							00:04:51			00:06:37							00:03:31			00:03:16
							0:30:00			00:03:09							00:17:46			00:05:36
							00:02:13			00:07:26							00:03:02			00:01:43
							0:30:00			00:02:08							00:05:16			00:02:17
							00:03:56			00:02:27							00:10:09			00:05:33
							00:01:29			00:02:37							00:13:39			00:02:05
							00:01:40			00:07:25							00:07:41			00:03:35
							00:01:31			00:05:00										00:04:29
							00:04:30			00:10:04										00:23:28
							00:01:18			00:03:46										00:03:12
							00:02:36			00:06:16										00:00:35
							00:01:59			00:11:31										00:02:05
							00:01:09			00:13:19
							0:30:00			00:05:44
							0:30:00			00:01:12
							00:05:24			0:30:00
							00:04:40			00:02:07
							00:05:52			0:30:00
							00:05:16			00:05:40
							00:02:55			00:26:33
							00:02:22			00:06:42
							0:30:00			00:30:00
							00:02:40			00:26:32
							00:01:39			0:30:00
							00:03:38			00:10:52
							00:05:58			00:09:16
							0:30:00			00:06:39
							0:30:00			00:04:20
							0:30:00			0:30:00
							0:30:00			00:03:35
							0:30:00			00:00:49
										00:04:20
										00:14:31
										00:02:16
										00:11:18
										0:30:00
										0:30:00
										00:09:01
										00:16:24
