# Supplementary material for: Drosulfakinin signaling modulates female sexual receptivity in Drosophila
Source: eLife. 2022 Apr 27;11:e76025. doi: 10.7554/eLife.76025 (PMC9045819; doi:10.7554/eLife.76025)
Supplement: Figure 2—figure supplement 1—source data 1. [file elife-76025-fig2-figsupp1-data1.xlsx]

## Sheet: Sheet1
Figure 2-figure supplement 1A
Genotpe	ovipositor extrusion/min	Genotpe	ovipositor extrusion/min		Genotpe	ovipositor extrusion/min	Genotpe	ovipositor extrusion/min		Genotpe	ovipositor extrusion/min	Genotpe	ovipositor extrusion/min
DskGAL4>UAS-dTrpA 29℃	0.3	DskGAL4>UAS-dTrpA 21℃	0.1		UAS-dTrpA/﹢ 29°C	0.2	UAS-dTrpA/﹢ 21°C	0.2		DskGAL4/﹢ 29°C	0.5	DskGAL4/﹢ 21°C	0.6
	0.3		0.7			0.2		0.6			0.7		0.1
	0.4		0.4			0.4		0.6			0.5		0.9
	0.3		1			0.4		1.1			0.6		1.4
	0.3		1.5			1.1		0.7			0.2		0.5
	0.4		0.2			1.5		0.9			0.8		0.3
	1.2		0.1			1.6		0.6			1		0.2
	1.3		0.2			0.2		1.3			1		0.3
	1		0.2			0.1		0.2			0.5		0.7
	0.9		0.1			0.3		0.3			0.3		0.2
	0.2		0.2			0.4		0.7			0.3		0.2
	0.2		0.5			0.2		0.6			0.2		0.1
			1			0.5							0.6
						0.6
