# Supplementary material for: Drosulfakinin signaling modulates female sexual receptivity in Drosophila
Source: eLife. 2022 Apr 27;11:e76025. doi: 10.7554/eLife.76025 (PMC9045819; doi:10.7554/eLife.76025)
Supplement: Figure 2—figure supplement 2—source data 1. [file elife-76025-fig2-figsupp2-data1.xlsx]

## Sheet: Sheet1
Figure 2-figure supplement 2A
Genotpe	Mean velocity(mm/s)	Genotpe	Mean velocity(mm/s)		Genotpe	Mean velocity(mm/s)	Genotpe	Mean velocity(mm/s)		Genotpe	Mean velocity(mm/s)	Genotpe	Mean velocity(mm/s)
DskGAL4>UAS-dTrpA 29℃	2.02034	DskGAL4>UAS-dTrpA 21℃	2.06722		DskGAL4/﹢ 29°C	1.63783	DskGAL4/﹢ 21°C	1.31222		UAS-dTrpA/﹢ 29°C	2.51489	UAS-dTrpA/﹢ 21°C	1.00837
	2.3445		1.56198			1.91749		1.48886			2.71895		2.3445
	1.82647		2.62444			2.32401		1.31126			2.56955		0.812395
	1.9244		2.67385			1.35116		1.35255			1.71369		1.53854
	1.82647		2.2412			2.01543		2.05259			2.35181		1.36466
	2.39251		2.63906			1.15192		1.57822			1.86938		1.82647
	2.0081		2.94016			1.43423		1.96446			2.20991		1.30697
	2.28098		2.46134			2.03851		1.02389			2.59047		1.31579
	2.09086		2.21371			1.40637		1.20274			2.4811		1.32973
	2.12714		2.04942			1.94464		1.57297			1.49561		1.61289
	2.16046		2.53982			2.19124		1.32101			2.56622		2.0081
			1.83927			1.47447		1.89787			2.33907		2.28098
Figure 2-figure supplement 2B
Genotpe	Mean velocity(mm/s)	Genotpe	Mean velocity(mm/s)	Genotpe	Mean velocity(mm/s)
DskGAL4>UAS-TNT	1.99677	DskGAL4>UAS-impTNT	1.52198	UAS-TNT/﹢	2.08758
	1.51819		1.03839		1.83556
	1.58492		1.34157		1.90255
	0.67661		1.22557		1.77084
	1.49436		1.3485		1.10458
	1.49894		1.02724		1.6049
	1.45287		1.65457		1.2995
	1.36935		2.05856		2.01033
	1.40714		1.56839		0.786335
	1.23157		1.14853		1.58032
	1.05416		1.28044		2.20389
			1.23935		0.961537
