# Supplementary material for: Drosulfakinin signaling modulates female sexual receptivity in Drosophila
Source: eLife. 2022 Apr 27;11:e76025. doi: 10.7554/eLife.76025 (PMC9045819; doi:10.7554/eLife.76025)
Supplement: Figure 2—figure supplement 3—source data 1. [file elife-76025-fig2-figsupp3-data1.xlsx]

## Sheet: Sheet1
Figure 2-figure supplement 3A
Genotpe	Copulation rate	StartTime	Genotpe	Copulation rate	StartTime	Genotpe	Copulation rate	StartTime
DskGAL4/UAS-kir2.1	0	00:10:44	﹢/UAS-kir2.1	0	00:02:25	DskGAL4/﹢	0	00:01:06
	0	00:08:53		0.0236967	00:01:18		0.0166667	00:00:43
	0.0648148	00:05:23		0.189573	00:03:25		0.144444	00:01:02
	0.185185	00:07:36		0.388626	00:01:55		0.355556	00:03:40
	0.425926	00:12:03		0.592417	00:03:05		0.538889	00:02:00
	0.634259	00:07:06		0.734597	00:02:29		0.661111	00:01:37
	0.736111	00:04:13		0.829384	00:01:47		0.711111	00:07:54
	0.833333	00:04:45		0.862559	00:02:56		0.783333	00:02:29
	0.907407	00:06:42		0.890995	00:02:55		0.8	00:02:26
	0.944444	00:04:44		0.905213	00:02:55		0.85	00:04:54
	0.958333	00:04:05		0.92891	00:03:05		0.883333	00:01:06
	0.967593	00:04:18		0.92891	00:02:23		0.894444	00:06:26
	0.967593	00:07:05		0.938389	00:00:54		0.911111	00:02:34
	0.981481	00:07:00		0.938389	00:01:41		0.911111	00:00:57
	0.981481	00:05:11		0.943128	00:00:54		0.911111	00:01:25
	0.986111	00:07:05		0.943128	00:01:40		0.911111	00:04:02
	0.986111	00:04:50		0.947867	00:04:06		0.916667	00:01:50
	0.986111	00:08:44		0.952607	00:00:56		0.916667	00:03:01
	0.986111	00:07:52		0.957346	00:01:52		0.922222	00:01:16
	0.986111	00:02:55		0.962085	00:02:16		0.922222	00:01:16
	0.986111	00:10:29		0.962085	00:02:57		0.927778	00:02:05
	0.986111	00:06:22		0.962085	00:03:09		0.927778	00:05:11
	0.986111	00:04:45		0.962085	00:01:12		0.927778	00:01:28
	0.986111	00:04:40		0.962085	00:02:35		0.927778	00:06:55
	0.986111	00:05:24		0.966825	00:07:31		0.933333	00:00:56
	0.986111	00:03:16		0.971564	00:01:57		0.933333	00:03:56
	0.986111	00:03:31		0.971564	00:02:19		0.933333	00:02:05
	0.986111	00:03:02		0.971564	00:03:42		0.933333	00:03:41
	0.986111	00:12:28		0.971564	00:05:13		0.933333	00:02:42
	0.986111	00:07:11		0.971564	00:03:44		0.933333	00:06:11
	0.986111	00:02:33		0.971564	00:05:33		0.938889	00:04:13
		00:03:04			00:04:39			00:01:06
		00:04:47			00:03:31			00:02:29
		00:03:38			00:01:23			00:02:45
		00:04:09			00:04:45			00:05:27
		00:07:14			00:03:12			00:03:03
		00:06:34			00:03:28			00:02:26
		00:06:03			00:01:20			00:02:27
		00:04:12			00:03:53			00:03:49
		00:05:06			00:01:25			00:02:45
		00:04:42			00:02:56			00:02:02
		00:07:33			00:03:35			00:02:26
		00:04:31			00:02:51			00:04:09
		00:06:20			00:01:36			00:06:03
		00:06:11			00:01:13			00:05:54
		00:08:18			00:02:27			00:03:12
		00:06:40			00:00:58			00:02:26
		00:07:16			00:01:36			00:01:49
		00:03:34			00:04:52			00:03:31
		00:06:00			00:02:17			00:01:31
		00:05:02			00:03:25			00:04:06
		00:04:21			00:05:57			00:03:04
		00:06:37			00:04:29			00:02:18
		00:04:13			00:06:21			00:02:52
		00:09:21			00:04:41			00:01:31
		00:05:08			00:02:46			00:06:59
		00:07:29			00:07:03			00:02:33
		00:04:13			00:05:00			00:04:37
		00:08:02			00:01:10			00:05:04
		00:03:27			00:03:26			00:04:11
		00:30:00			00:03:16			00:01:55
		00:06:32			00:03:56			00:02:23
		00:04:26			00:02:13			00:03:45
		00:04:31			00:02:47			00:03:15
		00:05:18			00:03:20			00:02:28
		00:04:09			00:02:13			00:08:12
		00:06:08			00:01:56			00:04:19
		00:05:57			00:03:15			00:04:41
		00:06:33			00:01:57			00:03:08
		00:05:25			00:02:47			00:09:48
		00:05:22			00:04:11			00:02:15
		00:03:13			00:03:14			00:02:27
		00:05:50			00:04:20			00:01:59
		00:08:56			00:01:15			00:01:13
		00:05:46			00:01:22			00:02:45
		00:04:52			00:02:11			00:04:34
		00:30:00			00:02:23			00:06:54
		00:07:40			00:01:42			00:05:40
		00:06:23			00:01:42			00:03:58
		00:06:31			00:02:33			00:03:57
		00:03:43			00:03:38			00:04:13
		00:08:31			00:02:18			00:02:45
		00:06:40			00:03:20			00:01:50
		00:09:26			00:03:01			00:02:17
		00:07:49			00:04:08			00:04:27
		00:08:07			00:01:59			00:01:58
		00:08:07			00:03:56			00:01:12
		00:03:52			00:01:56			00:02:36
		00:07:42			00:02:05			00:03:40
		00:06:56			00:01:36			00:03:04
		00:04:33			00:04:07			00:01:37
		00:04:55			00:00:39			00:02:01
		00:05:30			00:02:40			00:02:56
		00:04:16			00:02:05			00:02:33
		00:05:11			00:05:42			00:01:43
		00:07:43			00:03:15			00:02:07
		00:04:07			00:02:38			00:01:30
		00:05:11			00:05:54			00:02:46
		00:07:43			00:01:21			00:01:13
		00:07:20			00:02:03			00:05:49
		00:05:23			00:02:14			00:02:12
		00:06:01			00:01:47			00:03:14
		00:05:51			00:02:23			00:02:27
		00:06:14			00:02:05			00:02:06
		00:08:34			00:02:41			00:01:56
		00:04:28			00:02:21			00:03:58
		00:05:27			00:02:04			00:02:26
		00:03:47			00:01:34			00:01:37
		00:05:52			00:03:44			00:02:21
		00:02:49			00:02:17			00:08:37
		00:03:43			00:01:02			00:02:03
		00:04:51			00:01:52			00:02:25
		00:04:09			00:03:24			00:01:06
		00:07:42			00:03:45			00:02:18
		00:03:24			00:04:48			00:04:02
		00:03:44			00:01:49			00:06:31
		00:06:00			00:01:47			00:02:32
		00:09:57			00:03:27			00:05:05
		00:12:14			00:03:26			00:03:30
		00:03:08			00:04:29			00:02:21
		00:05:03			00:03:36
		00:07:42			00:02:43
		00:04:57			00:03:01
		00:07:00			00:05:23
		00:30:00			00:01:42
		00:03:44			00:03:46
		00:03:32			00:01:54
		00:05:11			00:02:55
		00:04:40			00:03:20
		00:14:22			00:03:25
		00:05:52			00:02:52
		00:04:19			00:01:03
		00:06:09			00:00:56
		00:03:55			00:04:01
		00:03:58			00:04:29
		00:03:30			00:01:52
					00:02:16
					00:02:12
					00:05:11
					00:04:48
					00:02:12
					00:02:57
					00:03:09
