# Supplementary material for: Drosulfakinin signaling modulates female sexual receptivity in Drosophila
Source: eLife. 2022 Apr 27;11:e76025. doi: 10.7554/eLife.76025 (PMC9045819; doi:10.7554/eLife.76025)
Supplement: Figure 2—source data 1. [file elife-76025-fig2-data1.xlsx]

## Sheet: Sheet1
Figure 2A							Figure 2B							Figure 2C							Figure 2D
Genotpe	Copulation rate	StartTime	Genotpe	Copulation rate	StartTime		Genotpe	Copulation rate	StartTime	Genotpe	Copulation rate	StartTime		Genotpe	Copulation rate	StartTime	Genotpe	Copulation rate	StartTime		Genotpe	Copulation rate	StartTime	Genotpe	Copulation rate	StartTime	Genotpe	Copulation rate	StartTime
DskGAL4>UAS-dTrpA 29℃	0	0	DskGAL4>UAS-dTrpA 21℃	0	00:06:51		UAS-dTrpA/﹢ 29°C	0	00:06:31	UAS-dTrpA/﹢ 21°C	0	00:06:49		DskGAL4/﹢ 29°C	0	00:05:22	DskGAL4/﹢ 21°C	0.0119048	00:30:00		DskGAL4>UAS-TNT	0	00:15:50	DskGAL4>UAS-impTNT	0	00:01:11	UAS-TNT/﹢	0	00:01:30
	0.00970874	00:01:04		0.0944882	00:20:50			0.0167598	00:03:11		0.0277778	00:03:48			0.0432099	00:06:30		0.0238095	00:10:42			0.0263158	00:08:18		0.039604	00:01:55		0.0166667	00:02:46
	0.262136	00:01:40		0.220472	00:13:43			0.128492	00:03:07		0.133333	00:02:50			0.185185	00:10:37		0.119048	00:11:34			0.1	00:07:17		0.282178	00:01:35		0.144444	00:01:55
	0.495146	00:01:44		0.362205	00:02:58			0.234637	00:06:21		0.272222	00:01:07			0.345679	00:02:47		0.244048	00:05:44			0.278947	00:17:37		0.50495	00:02:46		0.355556	00:02:23
	0.631068	00:02:35		0.503937	00:30:00			0.396648	00:09:27		0.416667	00:12:35			0.506173	00:05:56		0.375	00:03:47			0.4	00:06:20		0.658416	00:02:51		0.538889	00:02:12
	0.76699	00:03:22		0.566929	00:07:06			0.530726	00:10:53		0.533333	00:02:42			0.598765	00:23:44		0.511905	00:10:33			0.494737	00:05:47		0.727723	00:02:45		0.661111	00:03:14
	0.854369	00:06:03		0.669291	00:03:03			0.581006	00:07:06		0.655556	00:02:24			0.654321	00:03:57		0.595238	00:02:34			0.568421	00:01:00		0.811881	00:01:10		0.711111	00:02:27
	0.864078	00:03:05		0.724409	00:06:19			0.670391	00:30:00		0.711111	00:02:00			0.679012	00:03:16		0.654762	00:05:17			0.621053	00:04:15		0.876238	00:01:28		0.783333	00:02:06
	0.864078	00:01:39		0.748031	00:09:49			0.73743	00:06:09		0.744444	00:06:50			0.685185	00:01:56		0.696429	00:02:36			0.647368	00:03:43		0.910891	00:02:20		0.8	00:01:56
	0.893204	00:01:31		0.76378	00:12:14			0.765363	00:06:38		0.777778	00:01:28			0.703704	00:10:35		0.714286	00:02:34			0.663158	00:02:19		0.935644	00:02:42		0.85	00:03:58
	0.92233	00:02:22		0.771654	00:12:07			0.776536	00:04:17		0.816667	00:00:38			0.716049	00:04:22		0.755952	00:04:27			0.689474	00:05:44		0.935644	00:02:16		0.883333	00:02:26
	0.932039	00:02:33		0.779528	00:30:00			0.804469	00:08:41		0.827778	00:02:13			0.746914	00:11:18		0.779762	00:04:29			0.7	00:30:00		0.935644	00:01:13		0.894444	00:01:37
	0.951456	00:03:19		0.811024	00:03:30			0.832402	00:05:39		0.866667	00:04:24			0.759259	00:03:17		0.797619	00:21:29			0.705263	00:30:00		0.945545	00:03:13		0.911111	00:02:40
	0.951456	00:03:38		0.826772	00:08:00			0.837989	00:06:09		0.883333	00:01:09			0.771605	00:02:38		0.803571	00:21:30			0.726316	00:03:02		0.950495	00:03:19		0.911111	00:03:38
	0.951456	00:03:46		0.826772	00:30:00			0.849162	00:02:16		0.888889	00:04:37			0.783951	00:30:00		0.815476	00:30:00			0.742105	00:05:08		0.950495	00:05:07		0.911111	00:02:09
	0.961165	00:04:04		0.84252	00:01:23			0.854749	00:07:31		0.894444	00:11:29			0.790123	00:30:00		0.815476	00:01:39			0.747368	00:06:27		0.955446	00:06:21		0.911111	00:03:41
	0.970874	00:01:34		0.84252	00:30:00			0.860335	00:11:53		0.905556	00:07:05			0.790123	00:04:39		0.833333	00:03:13			0.752632	00:13:36		0.955446	00:03:00		0.916667	00:00:43
	0.970874	00:15:06		0.84252	00:09:30			0.865922	00:01:24		0.916667	00:01:56			0.790123	00:01:34		0.839286	00:02:09			0.752632	00:09:18		0.955446	00:03:06		0.916667	00:01:02
	0.980583	00:01:46		0.84252	00:30:00			0.871508	00:04:21		0.927778	00:09:49			0.802469	00:02:52		0.85119	00:30:00			0.757895	00:05:24		0.955446	00:00:59		0.922222	00:05:25
	0.980583	00:02:52		0.850394	00:06:53			0.877095	00:04:08		0.927778	00:01:21			0.808642	00:30:00		0.857143	00:15:12			0.757895	00:13:23		0.955446	00:00:59		0.922222	00:04:43
	0.980583	00:02:52		0.858268	00:19:44			0.888268	00:03:18		0.927778	00:02:04			0.814815	00:03:26		0.863095	00:03:34			0.757895	00:05:14		0.960396	00:01:03		0.927778	00:08:28
	0.980583	00:02:04		0.858268	00:08:14			0.893855	00:30:00		0.927778	00:04:15			0.814815	00:04:07		0.863095	00:30:00			0.757895	00:04:12		0.960396	00:07:35		0.927778	00:03:35
	0.980583	00:04:15		0.866142	00:15:33			0.899441	00:02:00		0.933333	00:30:00			0.820988	00:01:46		0.880952	00:06:12			0.757895	00:07:58		0.960396	00:04:17		0.927778	00:02:00
	0.990291	00:02:41		0.866142	00:03:08			0.910615	00:03:28		0.933333	00:02:58			0.833333	00:19:20		0.880952	00:06:05			0.757895	00:12:58		0.960396	00:03:04		0.927778	00:01:37
	0.990291	00:01:20		0.866142	00:27:28			0.910615	00:03:25		0.933333	00:16:09			0.839506	00:04:22		0.880952	00:01:13			0.757895	00:30:00		0.960396	00:06:07		0.933333	00:03:13
	0.990291	00:04:45		0.866142	00:02:52			0.910615	00:07:49		0.933333	00:03:39			0.839506	00:05:50		0.892857	00:04:55			0.757895	00:10:37		0.960396	00:03:07		0.933333	00:03:44
	0.990291	00:02:53		0.866142	00:06:55			0.910615	00:15:30		0.933333	00:06:25			0.839506	00:30:00		0.892857	00:13:49			0.757895	00:30:00		0.960396	00:08:16		0.933333	00:08:35
	0.990291	00:10:42		0.874016	00:02:12			0.910615	00:10:19		0.933333	00:00:52			0.851852	00:30:00		0.892857	00:21:26			0.763158	00:10:02		0.960396	00:01:35		0.933333	00:02:02
	0.990291	00:03:20		0.874016	00:07:04			0.921788	00:02:00		0.933333	00:01:04			0.851852	00:30:00		0.892857	00:03:16			0.763158	00:11:11		0.960396	00:30:00		0.933333	00:07:13
	0.990291	00:14:49		0.874016	00:30:00			0.921788	00:07:03		0.933333	00:09:31			0.858025	00:01:08		0.892857	00:07:32			0.763158	00:03:39		0.960396	00:03:09		0.933333	00:04:19
	0.990291	00:11:47			00:03:05			0.921788	00:05:03		0.933333	00:06:16			0.864198	00:30:00		0.892857	00:01:44			0.763158	00:09:51		0.960396	00:01:49		0.938889	00:04:33
		00:02:57			00:02:54				00:04:05			00:04:45				00:11:56			00:02:00				00:03:11			00:01:55			00:06:01
		00:01:20			00:04:12				00:01:15			00:03:29				00:30:00			00:03:26				00:30:00			00:04:37			00:01:49
		00:04:06			00:19:44				00:03:29			00:05:34				00:00:45			00:04:27				00:02:53			00:01:40			00:03:20
		00:05:03			00:08:14				00:22:03			00:03:08				00:13:19			00:02:20				00:12:13			00:02:01			00:29:51
		00:01:29			00:06:08				00:06:06			00:03:03				00:01:23			00:09:06				00:02:21			00:02:17			00:01:59
		00:01:56			00:06:53				00:04:35			00:02:49				00:02:51			00:00:45				00:30:00			00:30:00			00:01:06
		00:01:11			00:13:21				00:04:10			00:05:54				00:03:22			00:03:15				00:30:00			00:01:28			00:03:15
		00:03:23			00:30:00				00:03:37			00:01:50				00:02:55			00:05:23				00:04:22			00:02:53			00:30:00
		00:03:37			00:05:35				00:03:54			00:05:37				00:02:04			00:01:19				00:30:00			00:05:30			00:03:40
		00:01:35			00:30:00				00:20:40			00:01:14				00:02:25			00:01:04				00:30:00			00:02:26			00:02:28
		00:00:49			00:02:06				00:07:00			00:09:59				00:10:58			00:05:47				00:30:00			00:01:04			00:06:20
		00:09:00			00:04:23				00:03:28			00:09:30				00:01:37			00:03:52				00:30:00			00:03:12			00:07:54
		00:30:00			00:02:06				00:05:23			00:08:17				00:01:41			00:30:00				00:02:17			00:01:52			00:02:29
		00:05:38			00:30:00				00:01:01			00:04:16				00:01:52			00:04:21				00:30:00			00:01:45			00:06:40
		00:02:01			00:22:55				00:06:26			00:30:00				00:03:51			00:02:48				00:30:00			00:01:03			00:04:54
		00:01:22			00:03:18				00:01:53			00:04:14				00:30:00			00:02:58				00:30:00			00:06:20			00:01:06
		00:02:02			00:02:15				00:13:12			00:00:27				00:01:36			00:02:07				00:30:00			00:01:45			00:06:26
		00:05:47			00:02:20				00:04:44			00:04:42				00:02:10			00:19:20				00:03:17			00:02:40			00:02:34
		00:02:41			00:06:10				00:27:42			00:03:32				00:04:48			00:04:53				00:03:18			00:02:12			00:00:57
		00:03:10			00:03:04				00:04:05			00:04:07				00:26:04			00:04:05				00:03:27			00:02:04			00:30:00
		00:03:30			00:06:45				00:07:47			00:02:20				00:18:11			00:09:19				00:01:00			00:03:51			00:04:02
		00:04:12			00:04:25				00:30:00			00:01:11				00:03:08			00:24:56				00:06:23			00:01:34			00:01:50
		00:22:44			00:07:57				00:19:18			00:30:00				00:02:49			00:30:00				00:06:47			00:30:00			00:03:01
		00:05:56			00:11:21				00:16:38			00:06:33				00:02:46			00:17:02				00:05:35			00:02:51			00:01:16
		00:01:21			00:12:37				00:07:21			00:01:20				00:17:56			00:30:00				00:04:15			00:04:28			00:01:16
		00:04:00			00:04:42				00:07:29			00:04:10				00:01:07			00:04:19				00:30:00			00:01:50			00:02:05
		00:08:36			00:04:51				00:01:52			00:30:00				00:02:00			00:09:21				00:09:45			00:02:18			00:05:11
		00:04:13			00:06:51				00:04:43			00:05:05				00:01:46			00:04:27				00:02:12			00:01:47			00:01:28
		00:04:22			00:20:50				00:02:58			00:03:00				00:05:48			00:01:18				00:06:37			00:01:13			00:06:55
		00:04:29			00:13:43				00:02:07			00:02:32				00:03:33			00:04:05				00:30:00			00:02:50			00:03:29
		00:03:48			00:02:58				00:02:26			00:01:28				00:03:42			00:10:14				00:08:39			00:00:33			00:08:15
		00:02:55			00:30:00				00:06:19			00:04:24				00:02:48			00:02:07				00:08:16			00:01:37			00:06:31
		00:09:17			00:07:06				00:04:35			00:03:58				00:06:00			00:07:29				00:04:36			00:02:38			00:06:08
		00:02:19			00:03:03				00:01:49			00:02:10				00:03:42			00:05:30				00:09:44			00:01:29			00:01:25
		00:01:35			00:06:19				00:30:00			00:03:08				00:03:44			00:04:48				00:06:29			00:01:56			00:04:19
		00:01:11			00:01:51				00:03:20			00:06:54				00:30:00			00:04:56				00:09:41			00:01:30			00:04:58
		00:02:55			00:01:35				00:03:53			00:02:53				00:08:32			00:15:11				00:26:27			00:01:13			00:06:44
		00:05:42			00:12:07				00:03:17			00:06:35				00:10:53			00:04:28				00:05:42			00:02:56			00:02:18
		00:11:12			00:30:00				00:06:06			00:11:39				00:22:42			00:05:42				00:04:03			00:05:29			00:02:52
		00:02:58			00:03:30				00:04:33			00:17:45				00:02:27			00:30:00				00:03:47			00:02:39			00:01:31
		00:02:52			00:08:00				00:01:18			00:03:55				00:21:38			00:08:39				00:02:20			00:00:53			00:03:22
		00:09:26			00:30:00				00:04:37			00:03:35				00:01:56			00:30:00				00:30:00			00:03:22			00:02:21
		00:03:20			00:08:00				00:07:45			00:03:07				00:30:00			00:06:06				00:05:12			00:01:32			00:08:37
		00:08:24			00:30:00				00:06:20			00:01:11				00:01:50			00:04:05				00:30:00			00:30:00			00:02:03
		00:01:37			00:09:30				00:03:19			00:07:19				00:05:15			00:06:07				00:03:24			00:03:08			00:02:25
		00:02:20			00:30:00				00:06:26			00:05:08				00:30:00			00:12:33				00:02:27			00:06:50			00:30:00
		00:01:14			00:01:28				00:01:00			00:00:45				00:04:36			00:02:48				00:30:00			00:03:33			00:02:18
		00:01:38			00:03:01				00:03:16			00:01:58				00:00:43			00:01:04				00:30:00			00:05:39			00:04:02
		00:01:03			00:30:00				00:04:09			00:01:16				00:02:10			00:03:07				00:02:08			00:05:56			00:06:31
		00:02:12			00:15:33				00:03:53			00:16:51				00:01:37			00:30:00				00:14:11			00:03:48			00:02:32
		00:04:14			00:03:08				00:01:57			00:03:34				00:03:37			00:05:32				00:03:12			00:05:58			00:05:05
		00:02:44			00:27:28				00:03:53			00:04:18				00:30:00			00:03:27				00:02:31			00:07:51			00:03:30
		00:05:32			00:02:52				00:27:50			00:05:00				00:01:38			00:03:37				00:01:29			00:04:37			00:02:21
		00:02:22			00:06:55				00:03:29			00:05:10				00:14:16			00:03:55				00:30:00			00:02:34			00:15:51
		00:01:24			00:02:12				00:03:16			00:02:19				00:05:16			00:02:28				00:02:46			00:04:02			00:02:27
		00:02:35			00:07:04				00:01:51			00:05:55				00:03:45			00:04:25				00:30:00			00:06:41			00:03:49
		00:05:46			00:30:00				00:06:27			00:09:54				00:04:42			00:03:22				00:02:07			00:02:22			00:02:45
		00:01:00			00:03:05				00:30:00			00:05:34				00:02:40			00:30:00				00:30:00			00:03:36			00:08:31
		00:04:06			00:02:54				00:04:31			00:03:07				00:03:32			00:01:24				00:02:40			00:01:45			00:02:26
		00:01:13			00:04:12				00:02:14			00:04:19				00:01:47			00:05:57				00:04:03			00:02:05			00:04:09
		00:03:07			00:06:15				00:13:17			00:03:57				00:00:42			00:01:22				00:30:00			00:01:34			00:06:03
		00:01:00			00:04:54				00:04:46			00:03:39				00:01:14			00:04:22				00:30:00			00:00:42			00:05:54
		00:02:47			00:02:35				00:18:45			00:01:44				00:05:07			00:03:15				00:03:52			00:30:00			00:03:12
		00:04:35			00:03:35				00:01:07			00:05:17				00:30:00			00:05:26				00:06:05			00:01:52			00:02:26
		00:05:17			00:30:00				00:00:34			00:05:51				00:03:51			00:02:09				00:04:35			00:04:37			00:17:59
		00:04:42			00:30:00				00:03:42			00:04:10				00:04:26			00:13:51				00:07:01			00:00:47			00:03:15
		00:01:52			00:07:11				00:03:05			00:06:16				00:00:44			00:03:22				00:02:40			00:02:35			00:10:28
		00:17:00			00:04:45				00:30:00			00:30:00				00:02:00			00:03:38				00:00:54			00:03:31			00:30:00
		00:02:44			00:01:23				00:08:50			00:05:32				00:00:46			00:30:00				00:04:23			00:03:39			00:11:10
		00:05:15			00:01:26				00:17:36			00:05:24				00:00:43			00:06:41				00:02:10			00:03:02			00:03:45
		00:04:16			00:03:33				00:07:57			00:04:42				00:04:43			00:00:00				00:30:00			00:03:32			00:05:00
		00:03:04			00:02:15				00:30:00			00:15:36				00:04:54			00:07:55				00:02:29			00:01:50			00:11:59
		00:08:45			00:01:33				00:05:46			00:03:01				00:05:02			00:03:33				00:30:00			00:01:40			00:01:50
					00:02:49				00:06:03			00:12:00				00:03:53			00:03:12				00:07:54			00:02:42			00:02:17
					00:03:43				00:30:00			00:03:02				00:09:29			00:30:00				00:01:44			00:04:19			00:03:02
					00:05:00				00:10:58			00:03:25				00:06:10			00:09:36				00:01:42			00:03:10			00:19:09
					00:02:00				00:05:00			00:02:24				00:30:00			00:00:00				00:02:26			00:11:11			00:04:55
					00:01:31				00:02:52			00:05:33				00:02:31			00:24:01				00:30:00			00:03:15			00:04:27
					00:02:16				00:01:42			00:08:11				00:02:02			00:03:53				00:05:12			00:02:25			00:30:00
					00:01:57				00:05:30			00:07:54				00:03:55			00:03:02				00:03:03			00:03:46			00:01:12
					00:03:05				00:03:05			00:02:25				00:26:08			00:01:37				00:01:19			00:03:44			00:02:36
					00:05:03				00:08:59			00:01:41				00:02:29			00:03:04				00:05:58			00:19:43			00:03:40
					00:03:38				00:03:19			00:04:02				00:03:12			00:05:38				00:03:41			00:03:23			00:03:04
					00:01:31				00:21:38			00:11:43				00:08:44			00:02:00				00:02:58			00:02:11			00:08:55
					00:04:30				00:03:14			00:08:25				00:30:00			00:05:30				00:03:54			00:05:17			00:02:01
					00:30:00				00:07:59			00:02:43				00:04:35			00:02:32				00:30:00			00:01:42			00:02:56
					00:04:30				00:02:13			00:14:52				00:10:35			00:03:07				00:30:00			00:06:04			00:08:16
					00:01:35				00:04:30			00:30:00				00:05:00			00:02:25				00:02:22			00:02:16			00:01:43
					00:05:45				00:22:26			00:02:13				00:01:53			00:11:08				00:02:00			00:05:42			00:09:13
					00:30:00				00:04:00			00:05:37				00:07:29			00:02:20				00:30:00			00:01:25			00:00:56
					00:01:39				00:06:04			00:01:24				00:30:00			00:09:18				00:03:20			00:05:02			00:03:56
					00:01:51				00:05:12			00:01:26				00:13:24			00:02:32				00:05:48			00:06:00			00:02:05
					00:02:16				00:30:00			00:03:13				00:04:52			00:09:09				00:03:36			00:08:39			00:03:41
					00:04:49				00:02:07			00:02:41				00:03:57			00:01:10				00:12:19			00:01:14			00:02:42
					00:03:04				00:30:00			00:02:08				00:03:21			00:04:54				00:07:55			00:05:25			00:06:11
					00:30:00				00:30:00			00:05:34				00:30:00			00:04:56				00:03:51			00:05:49			00:04:13
									00:01:55			00:03:40				00:03:08			00:02:19				00:05:32			00:06:09			00:30:00
									00:08:40			00:05:13				00:01:53			00:04:10				00:30:00			00:08:02			00:30:00
									00:04:22			00:01:39				00:02:25			00:30:00				00:06:22			00:03:01			00:02:45
									00:07:01			00:07:59				00:01:34			00:01:34				00:05:33			00:07:48			00:05:27
									00:30:00			00:02:04				00:02:25			00:18:29				00:03:51			00:02:25			00:03:03
									00:12:31			00:13:19				00:03:22			00:04:06				00:30:00			00:02:05			00:08:29
									00:02:34			00:06:25				00:02:17			00:07:33				00:01:55			00:02:48			00:01:13
									00:11:41			00:04:04				00:03:41			00:02:55				00:30:00			00:05:16			00:02:45
									00:04:00			00:03:36				00:05:28			00:05:26				00:30:00			00:14:25			00:04:34
									00:01:46			00:30:00				00:02:09			00:15:58				00:13:46			00:06:20			00:06:54
									00:08:31			00:08:28				00:09:17			00:05:53				00:03:28			00:05:40			00:05:40
									00:04:46			00:12:47				00:02:52			00:09:32				00:02:05			00:02:25			00:03:58
									00:11:51			00:04:51				00:08:24			00:05:28				00:05:11			00:05:24			00:03:57
									00:02:25			00:02:16				00:00:58			00:06:34				00:30:00			00:03:57			00:04:13
									00:05:39			00:04:09				00:06:40			00:04:19				00:30:00			00:04:35			00:07:55
									00:02:38			00:05:45				00:03:51			00:08:47				00:06:25			00:01:07			00:30:00
									00:01:20			00:02:39				00:02:45			00:30:00				00:01:15			00:03:36			00:30:00
									00:03:52			00:09:58				00:30:00			00:01:12				00:30:00			00:01:57			00:03:31
									00:02:15			00:06:59				00:30:00			00:06:17				00:03:22			00:01:05			00:01:31
									00:11:50			00:03:07				00:30:00			00:16:24				00:00:58			00:02:18			00:04:06
									00:07:01			00:05:28				00:01:56			00:11:52				00:30:00			00:01:48			00:03:04
									00:01:53			00:10:14				00:30:00			00:30:00				00:02:45			00:00:28			00:30:00
									00:02:46			00:03:49				00:01:43			00:01:39				00:02:09			00:02:29			00:03:10
									00:09:31			00:30:00				00:02:44			00:04:32				00:02:06			00:01:21			00:04:34
									00:02:17			00:07:27				00:03:51			00:03:13				00:04:40			00:01:36			00:06:59
									00:04:43			00:07:56				00:17:27			00:30:00				00:04:23			00:02:41			00:02:33
									00:03:41			00:03:55				00:12:12			00:10:06				00:03:44			00:02:05			00:04:37
									00:11:55			00:03:24				00:01:02			00:17:15				00:04:46			00:08:00			00:05:04
									00:30:00			00:00:31				00:12:35			00:00:42				00:04:12			00:30:00			00:04:11
									00:02:44			00:02:15				00:04:30			00:30:00				00:04:45			00:06:04			00:01:58
									00:04:12			00:05:55				00:28:38			00:06:03				00:12:10			00:04:43			00:09:39
									00:05:13			00:05:19				00:22:38			00:02:21				00:01:45			00:05:55			00:03:54
									00:02:38			00:16:00				00:04:41			00:07:39				00:30:00			00:02:48			00:01:37
									00:03:48			00:05:43				00:03:15			00:06:14				00:02:10			00:01:46			00:02:33
									00:06:13			00:10:12				00:30:00			00:01:07				00:02:18			00:03:22			00:03:10
									00:00:47			00:30:00							00:07:24				00:04:25			00:06:41			00:02:07
									00:03:30			00:17:42							00:07:13				00:02:32			00:04:20			00:10:02
									00:01:26			00:30:00							00:01:52				00:30:00			00:04:05			00:04:00
									00:10:26			00:21:57							00:08:17				00:02:58			00:01:57			00:09:53
									00:10:58			00:05:51							00:04:46				00:03:00			00:03:49			00:09:24
									00:19:06			00:11:25							00:06:16				00:02:05			00:01:45			00:05:14
									00:01:36			00:04:12											00:05:00			00:07:31			00:11:34
									00:03:04			00:08:16											00:01:16			00:04:13			00:05:49
									00:05:06			00:03:30											00:30:00			00:01:27			00:03:45
									00:03:06			00:09:53											00:01:14			00:30:00			00:09:34
									00:05:00			00:08:33											00:04:36			00:08:41			00:23:34
									00:14:29			00:04:38											00:01:26			00:01:03			00:08:12
									00:01:50			00:02:15											00:01:52			00:03:05			00:04:19
									00:01:38			00:12:01											00:01:57			00:01:21			00:04:41
									00:02:26			00:11:15											00:04:10			00:00:45			00:03:08
									00:01:31			00:30:00											00:30:00			00:30:00			00:09:48
									00:30:00			00:11:36											00:02:44			00:05:03			00:02:15
												00:30:00											00:03:40			00:12:02			00:30:00
																							00:01:32			00:06:52
																							00:02:29			00:02:07
																							00:30:00			00:03:09
																							00:00:25			00:02:07
																							00:01:56			00:01:56
																							00:02:05			00:03:50
																							00:02:36			00:02:32
																							00:03:30			00:05:01
																							00:02:54			00:03:00
																							00:06:45			00:02:26
																										00:01:21
																										00:04:13
																										00:04:39
																										00:07:48
																										00:08:01
																										00:03:37
																										00:11:34
																										00:02:25
																										00:06:09
																										00:07:31
																										00:02:07
																										00:02:18
