# Supplementary material for: Drosulfakinin signaling modulates female sexual receptivity in Drosophila
Source: eLife. 2022 Apr 27;11:e76025. doi: 10.7554/eLife.76025 (PMC9045819; doi:10.7554/eLife.76025)
Supplement: Figure 3—figure supplement 2—source data 1. [file elife-76025-fig3-figsupp2-data1.xlsx]

## Sheet: Sheet1
Figure 3-figure supplement 2A							Figure 3-figure supplement 2B							Figure 3-figure supplement 2C							Figure 3-figure supplement 2D							Figure 3-figure supplement 2E
Genotpe	Copulation rate	StartTime	Genotpe	Copulation rate	StartTime		Genotpe	Copulation rate	StartTime	Genotpe	Copulation rate	StartTime		Genotpe	Copulation rate	StartTime	Genotpe	Copulation rate	StartTime		Genotpe	Copulation rate	StartTime	Genotpe	Copulation rate	StartTime		Genotpe	Copulation rate	StartTime	Genotpe	Copulation rate	StartTime
UAS>stop>dTrpAmyrc/+;GluRIAGAL4/﹢ 29 °C	0	00:03:10	UAS>stop>dTrpAmyrc/+;GluRIAGAL4/﹢ 21 °C	0	00:03:09		﹢/+;GluRIAGAL4/DskFlp 29 °C	0	00:01:32	﹢/+;GluRIAGAL4/DskFlp 21 °C	0	00:01:46		UAS>stop>dTrpAmyrc/+;DskFlp/﹢ 29 °C	0	00:01:52	UAS>stop>dTrpAmyrc/+;DskFlp/﹢ 21 °C	0	00:02:09		UAS>stop>dTrpAmyrc/+;TβHGAL4/﹢ 29 °C	0	00:12:33	UAS>stop>dTrpAmyrc/+;TβHGAL4/﹢ 21 °C	0	00:05:15		TβHGAL4/DskFlp 29 °C	0	00:05:20	TβHGAL4/DskFlp 21 °C	0	00:03:21
	0.0652174	00:05:00		0.0229008	00:02:10			0.0942029	00:02:45		0.0729927	00:01:55			0.0434783	00:02:53		0.0443038	00:04:25			0.0254237	00:02:37		0.00746269	00:05:11			0.0144928	00:12:49		0.0212766	00:03:53
	0.304348	00:01:36		0.21374	00:04:28			0.326087	00:01:27		0.255474	00:03:44			0.166667	00:19:23		0.189873	00:02:49			0.110169	00:02:29		0.134328	00:03:37			0.0362319	00:06:38		0.0992908	00:30:00
	0.601449	00:03:46		0.48855	00:01:35			0.623188	00:02:21		0.605839	00:02:07			0.289855	00:03:39		0.316456	00:05:00			0.305085	00:07:07		0.253731	00:02:36			0.166667	00:30:00		0.205674	00:08:57
	0.73913	00:01:24		0.641221	00:02:13			0.76087	00:03:50		0.737226	00:01:18			0.427536	00:07:08		0.417722	00:06:02			0.415254	00:03:20		0.358209	00:10:31			0.246377	00:05:01		0.319149	00:09:50
	0.862319	00:01:21		0.770992	00:02:40			0.876812	00:01:56		0.875912	00:02:00			0.543478	00:30:00		0.512658	00:09:13			0.550847	00:01:12		0.432836	00:03:09			0.362319	00:04:19		0.397163	00:11:12
	0.913043	00:01:54		0.839695	00:05:38			0.913043	00:02:50		0.927007	00:00:49			0.65942	00:30:00		0.56962	00:05:27			0.610169	00:02:09		0.529851	00:03:54			0.463768	00:05:42		0.460993	00:06:30
	0.934783	00:04:08		0.870229	00:02:12			0.934783	00:01:56		0.956204	00:04:00			0.702899	00:03:01		0.658228	00:30:00			0.669492	00:04:19		0.589552	00:30:00			0.586957	00:04:14		0.553191	00:03:29
	0.971014	00:01:24		0.931298	00:04:38			0.971014	00:06:30		0.963504	00:02:44			0.746377	00:03:20		0.696203	00:04:24			0.737288	00:05:03		0.649254	00:01:17			0.601449	00:30:00		0.595745	00:06:56
	0.971014	00:01:58		0.954198	00:02:04			0.971014	00:02:00		0.963504	00:03:12			0.768116	00:01:31		0.727848	00:02:08			0.745763	00:16:40		0.69403	00:15:38			0.630435	00:04:23		0.673759	00:01:44
	0.971014	00:03:19		0.961832	00:03:08			0.971014	00:01:11		0.963504	00:30:00			0.775362	00:03:43		0.772152	00:07:28			0.771186	00:30:00		0.738806	00:07:50			0.65942	00:08:58		0.716312	00:06:23
	0.971014	00:03:37		0.969466	00:02:49			0.971014	00:02:47		0.963504	00:02:05			0.804348	00:04:44		0.816456	00:04:15			0.805085	00:02:35		0.768657	00:05:48			0.688406	00:30:00		0.730496	00:07:28
	0.978261	00:02:24		0.969466	00:02:24			0.978261	00:00:42		0.963504	00:02:14			0.811594	00:06:13		0.860759	00:01:17			0.838983	00:01:20		0.776119	00:08:22			0.702899	00:09:45		0.787234	00:12:50
	0.978261	00:03:11		0.969466	00:04:00			0.978261	00:01:01		0.963504	00:04:46			0.811594	00:03:31		0.873418	00:06:44			0.855932	00:03:22		0.813433	00:23:46			0.73913	00:05:13		0.801418	00:02:35
	0.978261	00:03:38		0.977099	00:02:02			0.978261	00:01:16		0.963504	00:02:29			0.826087	00:04:31		0.873418	00:02:43			0.881356	00:04:24		0.820896	00:03:50			0.746377	00:12:07		0.808511	00:08:42
	0.978261	00:01:31		0.977099	00:02:25			0.978261	00:00:49		0.963504	00:02:10			0.84058	00:04:16		0.873418	00:20:08			0.889831	00:02:38		0.835821	00:07:25			0.746377	00:02:18		0.815603	00:03:22
	0.978261	00:02:23		0.977099	00:04:48			0.978261	00:02:45		0.970803	00:02:08			0.84058	00:04:00		0.879747	00:28:12			0.898305	00:00:52		0.858209	00:04:15			0.753623	00:04:43		0.822695	00:30:00
	0.978261	00:02:00		0.977099	00:02:39			0.978261	00:02:00		0.970803	00:02:16			0.855072	00:07:03		0.892405	00:02:40			0.915254	00:02:26		0.873134	00:01:52			0.753623	00:04:35		0.822695	00:30:00
	0.978261	00:03:19		0.977099	00:03:26			0.978261	00:02:04		0.970803	00:01:33			0.855072	00:07:47		0.892405	00:02:58			0.915254	00:04:45		0.873134	00:03:52			0.76087	00:02:11		0.829787	00:18:16
	0.978261	00:02:20		0.977099	00:02:29			0.978261	00:01:10		0.970803	00:01:53			0.869565	00:05:29		0.905063	00:30:00			0.915254	00:05:04		0.880597	00:02:17			0.76087	00:04:46		0.851064	00:02:56
	0.978261	00:01:05		0.977099	00:02:00			0.978261	00:01:55		0.970803	00:06:06			0.876812	00:01:15		0.905063	00:00:49			0.915254	00:10:52		0.88806	00:01:34			0.782609	00:06:55		0.851064	00:20:28
	0.978261	00:03:48		0.977099	00:04:31			0.978261	00:03:08		0.970803	00:02:29			0.898551	00:03:53		0.917722	00:09:49			0.915254	00:02:13		0.88806	00:12:13			0.789855	00:09:44		0.858156	00:17:28
	0.978261	00:02:58		0.977099	00:03:55			0.978261	00:05:31		0.970803	00:05:18			0.898551	00:30:00		0.917722	00:30:00			0.915254	00:07:56		0.88806	00:07:48			0.789855	00:04:15		0.858156	00:30:00
	0.978261	00:02:43		0.977099	00:06:23			0.978261	00:01:50		0.970803	00:03:57			0.898551	00:01:56		0.917722	00:04:18			0.915254	00:02:56		0.88806	00:01:33			0.797101	00:03:16		0.865248	00:10:25
	0.978261	00:02:12		0.977099	00:07:40			0.978261	00:03:24		0.970803	00:04:36			0.905797	00:10:52		0.917722	00:08:17			0.915254	00:01:54		0.895522	00:08:05			0.811594	00:30:00		0.87234	00:02:15
	0.978261	00:07:54		0.977099	00:06:22			0.978261	00:03:03		0.970803	00:01:37			0.905797	00:05:16		0.917722	00:09:02			0.915254	00:03:34		0.895522	00:02:14			0.811594	00:06:40		0.87234	00:01:04
	0.978261	00:02:11		0.977099	00:03:27			0.978261	00:30:00		0.970803	00:01:00			0.92029	00:01:22		0.917722	00:02:21			0.915254	00:03:54		0.895522	00:07:00			0.811594	00:15:08		0.87234	00:08:48
	0.978261	00:03:04		0.977099	00:02:54			0.978261	00:03:26		0.970803	00:02:54			0.92029	00:05:49		0.924051	00:05:48			0.923729	00:01:29		0.902985	00:01:24			0.811594	00:06:27		0.879433	00:03:47
	0.978261	00:03:03		0.977099	00:01:25			0.978261	00:00:58		0.970803	00:02:32			0.92029	00:25:57		0.924051	00:01:28			0.923729	00:15:17		0.902985	00:01:20			0.811594	00:30:00		0.879433	00:30:00
	0.978261	00:05:00		0.977099	00:01:34			0.978261	00:00:54		0.978102	00:02:33			0.92029	00:03:33		0.93038	00:01:50			0.923729	00:11:32		0.902985	00:30:00			0.811594	00:04:31		0.879433	00:13:41
	0.978261	00:03:30		0.977099	00:02:33			0.978261	00:15:00		0.985401	00:02:17			0.92029	00:01:14		0.93038	00:07:45			0.923729	00:09:39		0.902985	00:30:00			0.833333	00:30:00		0.886525	00:01:49
		00:04:05			00:02:24				00:02:22			00:04:07				00:03:47			00:09:22				00:00:49			00:04:12				00:06:05			00:08:48
		00:02:44			00:01:36				00:01:17			00:01:00				00:08:21			00:30:00				00:03:22			00:02:00				00:02:09			00:05:55
		00:02:00			00:07:45				00:01:37			00:03:48				00:16:48			00:04:11				00:04:00			00:02:18				00:29:39			00:08:27
		00:03:35			00:02:03				00:01:30			00:30:00				00:14:51			00:01:55				00:13:07			00:30:00				00:30:00			00:00:53
		00:02:09			00:08:22				00:08:25			00:02:24				00:05:46			00:16:44				00:07:50			00:01:21				00:02:00			00:11:01
		00:06:49			00:02:40				00:02:42			00:03:40				00:02:48			00:02:16				00:03:07			00:05:04				00:20:41			00:09:20
		00:04:10			00:04:00				00:01:12			00:04:10				00:20:54			00:01:17				00:07:49			00:02:12				00:06:07			00:30:00
		00:02:14			00:01:29				00:01:32			00:02:37				00:00:51			00:07:00				00:02:53			00:30:00				00:19:47			00:02:43
		00:02:04			00:01:53				00:01:05			00:03:21				00:09:00			00:01:47				00:06:21			00:09:31				00:07:25			00:15:38
		00:02:02			00:05:52				00:01:00			00:03:09				00:00:31			00:12:10				00:02:19			00:09:35				00:03:38			00:04:07
		00:02:08			00:05:52				00:03:15			00:03:30				00:06:06			00:04:47				00:05:20			00:30:00				00:03:30			00:06:56
		00:02:08			00:03:18				00:01:07			00:02:33				00:07:57			00:30:00				00:02:43			00:16:37				00:10:26			00:01:06
		00:04:47			00:02:24				00:02:16			00:03:45				00:01:26			00:02:20				00:01:45			00:02:16				00:02:56			00:30:00
		00:02:58			00:04:05				00:03:46			00:02:35				00:05:47			00:11:51				00:10:25			00:08:12				00:03:27			00:09:51
		00:01:26			00:01:42				00:30:00			00:05:31				00:06:57			00:10:54				00:01:07			00:02:27				00:03:31			00:08:18
		00:02:26			00:03:17				00:02:32			00:02:55				00:01:45			00:01:41				00:04:26			00:01:35				00:06:35			00:02:42
		00:00:43			00:30:00				00:04:14			00:01:51				00:10:03			00:03:13				00:09:24			00:07:52				00:03:36			00:03:53
		00:02:00			00:03:18				00:04:09			00:05:18				00:05:42			00:02:01				00:02:12			00:05:51				00:04:09			00:02:16
		00:04:26			00:30:00				00:01:49			00:04:01				00:08:07			00:02:56				00:04:10			00:10:21				00:02:47			00:03:50
		00:02:33			00:01:23				00:01:01			00:15:26				00:03:23			00:04:00				00:07:51			00:07:12				00:02:47			00:03:27
		00:00:42			00:01:46				00:01:32			00:02:54				00:02:27			00:01:16				00:03:27			00:02:33				00:05:06			00:11:25
		00:05:56			00:01:03				00:03:08			00:03:00				00:01:08			00:16:56				00:02:20			00:04:37				00:03:51			00:05:51
		00:01:51			00:04:54				00:01:43			00:06:11				00:04:09			00:01:28				00:11:04			00:01:23				00:10:46			00:07:23
		00:01:41			00:01:39				00:02:46			00:00:46				00:02:07			00:09:19				00:02:45			00:06:17				00:06:28			00:06:36
		00:02:51			00:07:29				00:30:00			00:01:22				00:01:09			00:07:00				00:30:00			00:01:52				00:06:09			00:07:14
		00:01:58			00:01:55				00:02:09			00:30:00				00:11:26			00:11:47				00:30:00			00:10:00				00:30:00			00:06:34
		00:01:42			00:02:50				00:02:25			00:05:39				00:01:11			00:10:36				00:30:00			00:18:58				00:12:45			00:18:06
		00:04:06			00:01:12				00:02:09			00:03:49				00:30:00			00:07:02				00:01:52			00:01:45				00:04:47			00:03:54
		00:04:28			00:03:53				00:02:41			00:04:35				00:02:14			00:02:07				00:03:54			00:12:48				00:30:00			00:12:12
		00:02:45			00:04:03				00:30:00			00:03:05				00:01:08			00:01:58				00:30:00			00:04:05				00:05:55			00:03:18
		00:01:15			00:07:29				00:05:52			00:03:00				00:16:38			00:09:17				00:02:06			00:01:52				00:02:57			00:30:00
		00:04:26			00:10:53				00:07:05			00:04:29				00:06:07			00:06:37				00:30:00			00:05:39				00:03:37			00:08:40
		00:03:34			00:03:30				00:02:02			00:03:24				00:13:33			00:03:17				00:16:37			00:06:44				00:12:37			00:30:00
		00:03:29			00:05:00				00:01:20			00:03:06				00:01:16			00:06:05				00:13:53			00:04:18				00:02:35			00:09:36
		00:01:31			00:01:19				00:03:40			00:07:24				00:00:57			00:00:32				00:06:17			00:05:15				00:02:56			00:01:30
		00:01:58			00:07:24				00:00:45			00:02:16				00:02:43			00:30:00				00:11:26			00:05:11				00:06:37			00:26:12
		00:04:00			00:03:09				00:03:17			00:02:31				00:04:05			00:01:45				00:05:00			00:03:37				00:02:33			00:02:33
		00:00:58			00:04:22				00:01:21			00:01:12				00:00:52			00:26:20				00:01:37			00:02:36				00:03:15			00:04:54
		00:04:49			00:04:23				00:30:00			00:01:39				00:23:46			00:10:30				00:08:40			00:10:31				00:30:00			00:11:09
		00:01:02			00:02:46				00:04:01			00:04:42				00:02:43			00:08:09				00:02:02			00:03:09				00:05:29			00:18:03
		00:30:00			00:04:14				00:01:32			00:02:18				00:06:57			00:05:31				00:10:41			00:03:54				00:10:53			00:11:21
		00:07:04			00:08:32				00:02:51			00:02:42				00:04:12			00:06:18				00:05:18			00:30:00				00:02:34			00:03:38
		00:11:08			00:05:51				00:02:14			00:02:09				00:01:57			00:05:06				00:03:53			00:01:17				00:03:40			00:04:06
		00:01:54			00:02:31				00:02:14			00:02:35				00:04:15			00:03:18				00:12:34			00:15:38				00:30:00			00:30:00
		00:03:51			00:04:58				00:03:40			00:03:31				00:04:56			00:15:24				00:05:01			00:07:50				00:02:43			00:01:54
		00:00:46			00:03:48				00:02:06			00:02:18				00:10:03			00:10:09				00:14:24			00:05:48				00:00:46			00:11:11
		00:03:17			00:02:37				00:06:30			00:01:32				00:02:50			00:09:20				00:02:16			00:08:22				00:05:12			00:30:00
		00:01:52			00:09:18				00:01:40			00:03:16				00:18:33			00:02:13				00:05:29			00:23:46				00:30:00			00:01:45
		00:06:24			00:03:35				00:02:21			00:05:10				00:14:24			00:03:30				00:04:25			00:03:50				00:13:33			00:03:07
		00:01:39			00:05:42				00:20:04			00:02:31				00:04:10			00:10:02				00:02:26			00:07:25				00:06:25			00:01:47
		00:07:30			00:02:31				00:01:48			00:01:25				00:04:48			00:03:01				00:01:16			00:04:15				00:02:10			00:30:00
		00:01:47			00:05:08				00:30:00			00:00:32				00:03:38			00:01:16				00:07:26			00:01:52				00:30:00			00:05:19
		00:01:43			00:07:31				00:01:49			00:05:56				00:03:31			00:04:48				00:30:00			00:03:52				00:01:25			00:05:15
		00:02:15			00:07:34				00:01:06			00:04:27				00:30:00			00:02:02				00:04:30			00:02:17				00:02:11			00:04:57
		00:01:40			00:02:04				00:02:14			00:01:28				00:05:11			00:02:15				00:04:57			00:01:34				00:01:50			00:30:00
		00:02:39			00:02:38				00:02:08			00:02:17				00:03:35			00:30:00				00:30:00			00:12:13				00:08:23			00:23:04
		00:01:28			00:04:02				00:01:21			00:02:49				00:02:42			00:12:27				00:02:40			00:07:48				00:30:00			00:11:36
		00:01:55			00:02:27				00:01:04			00:01:44				00:05:43			00:00:48				00:04:58			00:01:33				00:23:16			00:06:13
		00:30:00			00:01:07				00:00:55			00:05:18				00:01:53			00:00:31				00:09:09			00:08:05				00:06:43			00:02:52
		00:05:25			00:03:41				00:02:04			00:04:41				00:25:06			00:05:42				00:03:34			00:02:14				00:30:00			00:04:43
		00:03:13			00:00:16				00:00:49			00:04:34				00:02:21			00:05:36				00:02:39			00:07:00				00:05:03			00:06:54
		00:01:30			00:01:41				00:02:46			00:02:09				00:30:00			00:30:00				00:30:00			00:01:24				00:04:10			00:07:33
		00:02:20			00:00:39				00:00:58			00:02:43				00:05:40			00:03:17				00:03:43			00:01:20				00:04:48			00:04:55
		00:05:00			00:00:45				00:02:24			00:02:56				00:03:12			00:06:20				00:26:32			00:30:00				00:30:00			00:01:44
		00:00:30			00:01:30				00:30:00			00:02:45				00:04:26			00:04:05				00:07:52			00:30:00				00:29:19			00:04:34
		00:05:16			00:03:07				00:00:49			00:02:28				00:04:55			00:02:04				00:06:57			00:04:12				00:23:34			00:09:36
		00:30:00			00:05:52				00:07:58			00:04:16				00:13:25			00:00:37				00:05:42			00:02:00				00:11:27			00:02:53
		00:00:42			00:03:11				00:00:37			00:04:14				00:07:16			00:02:01				00:06:12			00:02:18				00:02:30			00:05:10
		00:05:36			00:02:47				00:02:38			00:04:20				00:06:07			00:06:07				00:06:01			00:30:00				00:09:18			00:01:06
		00:02:02			00:02:53				00:03:06			00:28:22				00:05:13			00:07:38				00:04:24			00:01:21				00:05:38			00:03:36
		00:05:49			00:01:07				00:30:00			00:02:41				00:03:29			00:06:40				00:03:24			00:30:00				00:06:24			00:02:03
		00:01:38			00:01:58				00:00:44			00:01:03				00:30:00			00:30:00				00:04:21			00:02:00				00:04:53			00:05:32
		00:02:41			00:05:23				00:02:33			00:02:54				00:02:39			00:03:47				00:04:17			00:02:57				00:08:50			00:06:58
		00:01:16			00:01:47				00:02:03			00:01:00				00:01:49			00:30:00				00:10:49			00:03:21				00:17:49			00:03:00
		00:02:10			00:01:34				00:01:17			00:06:40				00:04:05			00:11:41				00:06:38			00:04:19				00:01:41			00:02:00
		00:01:21			00:01:38				00:04:44			00:02:50				00:03:19			00:10:20				00:01:47			00:01:00				00:11:21			00:04:21
		00:02:03			00:30:00				00:03:17			00:06:57				00:07:46			00:08:08				00:04:49			00:05:26				00:12:21			00:08:25
		00:02:18			00:03:06				00:02:22			00:03:40				00:03:51			00:04:13				00:02:25			00:12:04				00:09:30			00:08:21
		00:01:39			00:04:25				00:02:20			00:01:19				00:02:46			00:05:18				00:01:00			00:30:00				00:06:25			00:05:23
		00:02:58			00:06:37				00:00:57			00:01:51				00:02:22			00:01:23				00:06:13			00:05:25				00:30:00			00:00:52
		00:02:34			00:03:51				00:20:10			00:01:40				00:18:19			00:02:28				00:12:00			00:13:26				00:04:12			00:06:31
		00:01:43			00:02:48				00:01:34			00:04:16				00:08:03			00:11:41				00:03:57			00:10:28				00:08:39			00:04:19
		00:02:03			00:03:23				00:01:08			00:00:40				00:03:07			00:10:49				00:13:35			00:30:00				00:30:00			00:22:36
		00:07:18			00:01:31				00:02:25			00:02:49				00:05:12			00:07:20				00:02:57			00:06:11				00:05:49			00:11:13
		00:05:06			00:04:16				00:00:42			00:01:57				00:02:03			00:05:45				00:07:37			00:02:17				00:10:53			00:05:30
		00:02:46			00:13:41				00:02:16			00:04:47				00:04:46			00:04:16				00:04:19			00:06:51				00:02:30			00:30:00
		00:02:30			00:03:48				00:01:10			00:00:53				00:10:18			00:06:40				00:02:04			00:03:52				00:04:58			00:14:47
		00:02:01			00:05:01				00:01:17			00:03:00				00:05:30			00:11:17							00:05:06				00:19:52			00:04:24
		00:02:14			00:02:36				00:01:54			00:02:18				00:30:00			00:02:10							00:30:00				00:00:40			00:10:10
		00:02:03			00:02:28				00:05:22			00:00:48				00:00:46			00:03:32							00:05:25				00:05:48			00:02:10
		00:01:34			00:08:05				00:01:34			00:00:53				00:30:00			00:07:57							00:07:36				00:30:00			00:03:22
		00:04:51			00:01:04				00:01:16			00:02:26				00:04:50			00:11:54							00:01:34				00:30:00			00:10:00
		00:04:08			00:02:10				00:01:04			00:01:38				00:03:42			00:01:34							00:30:00				00:30:00			00:06:32
		00:05:35			00:02:19				00:01:54			00:04:20				00:02:13			00:20:25							00:12:56				00:30:00			00:08:21
		00:03:47			00:02:53				00:03:12			00:01:14				00:05:32			00:19:00							00:04:28				00:19:49			00:30:00
		00:02:54			00:01:38				00:03:40			00:01:54				00:03:56			00:03:56							00:03:58				00:30:00			00:06:22
		00:04:08			00:02:16				00:01:16			00:02:19				00:00:39			00:01:30							00:04:52				00:06:41			00:05:31
		00:01:00			00:02:20				00:02:30			00:01:23				00:20:08			00:08:35							00:12:18				00:05:41			00:08:40
		00:07:40			00:06:05				00:02:46			00:02:19				00:02:24			00:01:42							00:06:28				00:04:09			00:02:27
		00:00:36			00:07:25				00:02:00			00:03:03				00:30:00			00:06:41							00:09:18				00:03:21			00:04:53
		00:00:25							00:30:00			00:02:10				00:30:00			00:02:24							00:03:13				00:30:00			00:07:15
		00:01:24							00:01:30			00:01:21				00:01:38			00:05:23							00:09:11				00:02:58			00:03:29
		00:04:10							00:01:41			00:03:49				00:05:15			00:04:18							00:03:08				00:07:11			00:06:45
		00:02:34							00:03:47			00:04:08				00:20:29			00:01:21											00:22:42			00:03:43
		00:02:08							00:02:48			00:02:30				00:02:49			00:04:53											00:05:39			00:02:35
		00:06:02							00:01:00			00:01:43				00:05:56			00:08:57											00:06:19			00:30:00
		00:03:51							00:01:58							00:05:17			00:06:46											00:06:23			00:00:50
																			00:03:45														00:01:06
																			00:03:36														00:29:19
																			00:03:32														00:07:09
																			00:03:11
																			00:01:52
																			00:03:09
																			00:01:43
																			00:03:12
																			00:01:27
																			00:00:55
																			00:06:09
																			00:11:37
																			00:30:00
																			00:00:43
																			00:04:34
																			00:18:50
																			00:03:31
																			00:01:23
																			00:01:38
																			00:01:55
