# Supplementary material for: Drosulfakinin signaling modulates female sexual receptivity in Drosophila
Source: eLife. 2022 Apr 27;11:e76025. doi: 10.7554/eLife.76025 (PMC9045819; doi:10.7554/eLife.76025)
Supplement: Figure 3—source data 1. [file elife-76025-fig3-data1.xlsx]

## Sheet: Sheet1
Figure 3C							Figure 3D													Figure3E							Figure 3F
Genotpe	Copulation rate	StartTime	Genotpe	Copulation rate	StartTime		Genotpe	Copulation rate	StartTime	Genotpe	Copulation rate	StartTime	Genotpe	Copulation rate	StartTime	Genotpe	Copulation rate	StartTime		Genotpe	Copulation rate	StartTime	Genotpe	Copulation rate	StartTime		Genotpe	Copulation rate	StartTime	Genotpe	Copulation rate	StartTime	Genotpe	Copulation rate	StartTime	Genotpe	Copulation rate	StartTime
UAS>stop>dTrpAmyrc/+;GluRIAGAL4/DskFlp 29 °C	0	00:01:11	UAS>stop>dTrpAmyrc/+;GluRIAGAL4/DskFlp 21 °C	0	00:09:21		UAS>stop>kireGFP/+;GluRIAGAL4/DskFlp	0	00:16:29	UAS>stop>kireGFP/++/DskFlp	0	00:02:18	UAS>stop>kireGFP/+;GluRIAGAL4/+	0	00:02:36	﹢/+;GluRIAGAL4/DskFlp	0	00:01:02		UAS>stop>dTrpAmyrc/+;TβHGAL4/DskFlp 29 °C	0	00:02:23	UAS>stop>dTrpAmyrc/+;TβHGAL4/DskFlp 21 °C	0.00574713	00:05:44		UAS>stop>kireGFP/+;TβHGAL4/DskFlp	0	00:02:44	UAS>stop>kireGFP/++/DskFlp	0	00:02:18	UAS>stop>kireGFP/+;TβHGAL4/﹢	0	00:05:32	﹢/+;TβHGAL4/DskFlp	0	00:03:58
	0.046875	00:01:26		0.015544	00:04:48			0.0133333	00:11:51		0.00793651	00:04:20		0.0443038	00:03:49		0.0503597	00:07:17			0.0164835	00:03:34		0.0287356	00:30:00			0.0220588	00:02:40		0.00793651	00:04:20		0.0532544	00:02:00		0.0538462	00:30:00
	0.239583	00:01:26		0.0932642	00:06:20			0.06	00:24:46		0.134921	00:03:18		0.158228	00:06:17		0.23741	00:02:34			0.115385	00:05:26		0.0747126	00:30:00			0.125	00:03:20		0.134921	00:03:18		0.242604	00:02:40		0.169231	00:02:00
	0.411458	00:04:10		0.202073	00:05:12			0.18	00:07:31		0.388889	00:02:52		0.386076	00:02:22		0.496403	00:30:00			0.164835	00:04:53		0.126437	00:21:27			0.316176	00:08:52		0.388889	00:02:52		0.431953	00:03:46		0.384615	00:03:33
	0.588542	00:04:12		0.367876	00:05:13			0.26	00:27:51		0.547619	00:03:30		0.689873	00:03:05		0.683453	00:07:03			0.225275	00:03:14		0.218391	00:19:15			0.455882	00:04:21		0.547619	00:03:30		0.609467	00:03:50		0.553846	00:01:51
	0.703125	00:04:57		0.512953	00:09:55			0.36	00:04:44		0.698413	00:04:29		0.772152	00:03:35		0.81295	00:02:40			0.313187	00:22:37		0.252874	00:29:19			0.580882	00:05:47		0.698413	00:04:29		0.715976	00:01:02		0.692308	00:06:16
	0.776042	00:06:14		0.595855	00:08:53			0.4	00:17:48		0.761905	00:02:12		0.829114	00:02:02		0.856115	00:04:37			0.379121	00:17:45		0.321839	00:30:00			0.691176	00:06:37		0.761905	00:02:12		0.822485	00:02:54		0.746154	00:07:52
	0.838542	00:05:43		0.663212	00:04:26			0.48	00:11:21		0.801587	00:02:40		0.898734	00:04:26		0.877698	00:30:00			0.434066	00:04:15		0.373563	00:06:48			0.757353	00:03:07		0.801587	00:02:40		0.869822	00:01:53		0.807692	00:03:46
	0.864583	00:06:50		0.704663	00:10:58			0.526667	00:18:32		0.84127	00:02:10		0.924051	00:03:40		0.913669	00:02:12			0.489011	00:11:42		0.442529	00:02:16			0.816176	00:07:54		0.84127	00:02:10		0.881657	00:02:01		0.861538	00:04:01
	0.885417	00:02:51		0.740933	00:06:55			0.553333	00:04:41		0.873016	00:05:05		0.936709	00:03:07		0.928058	00:01:38			0.5	00:18:50		0.488506	00:30:00			0.830882	00:02:26		0.873016	00:05:05		0.893491	00:04:38		0.884615	00:03:24
	0.901042	00:02:52		0.792746	00:07:36			0.586667	00:30:00		0.912698	00:02:51		0.936709	00:05:00		0.935252	00:04:15			0.521978	00:07:26		0.528736	00:06:22			0.860294	00:02:47		0.912698	00:02:51		0.905325	00:05:25		0.892308	00:00:39
	0.90625	00:04:54		0.80829	00:19:14			0.613333	00:30:00		0.920635	00:03:40		0.949367	00:05:06		0.942446	00:04:43			0.538462	00:02:33		0.545977	00:12:03			0.867647	00:09:26		0.920635	00:03:40		0.923077	00:06:37		0.907692	00:06:12
	0.911458	00:01:53		0.823834	00:13:08			0.646667	00:02:34		0.928571	00:01:22		0.962025	00:01:41		0.942446	00:10:23			0.554945	00:30:00		0.563218	00:30:00			0.867647	00:01:13		0.928571	00:01:22		0.928994	00:04:33		0.915385	00:05:47
	0.911458	00:01:11		0.854922	00:08:43			0.666667	00:06:44		0.928571	00:01:50		0.962025	00:03:04		0.942446	00:01:34			0.576923	00:30:00		0.586207	00:30:00			0.875	00:04:33		0.928571	00:01:50		0.934911	00:03:50		0.915385	00:03:04
	0.921875	00:01:11		0.880829	00:09:40			0.686667	00:16:28		0.928571	00:01:57		0.962025	00:06:23		0.94964	00:02:35			0.593407	00:30:00		0.62069	00:30:00			0.889706	00:01:10		0.928571	00:01:57		0.934911	00:01:18		0.915385	00:09:06
	0.921875	00:02:51		0.88601	00:19:06			0.7	00:08:00		0.928571	00:04:00		0.962025	00:02:00		0.94964	00:30:00			0.598901	00:11:11		0.643678	00:30:00			0.897059	00:07:42		0.928571	00:04:00		0.934911	00:02:48		0.938462	00:30:00
	0.927083	00:09:17		0.891192	00:13:25			0.713333	00:24:37		0.936508	00:02:00		0.974684	00:02:11		0.94964	00:02:59			0.604396	00:30:00		0.672414	00:30:00			0.904412	00:02:20		0.936508	00:02:00		0.940828	00:15:44		0.938462	00:04:33
	0.927083	00:01:48		0.901554	00:16:20			0.733333	00:25:23		0.936508	00:01:14		0.974684	00:02:44		0.94964	00:01:29			0.604396	00:00:38		0.672414	00:30:00			0.919118	00:02:58		0.936508	00:01:14		0.940828	00:00:57		0.938462	00:04:01
	0.927083	00:02:18		0.911917	00:14:40			0.766667	00:04:15		0.936508	00:01:40		0.981013	00:02:01		0.94964	00:02:36			0.626374	00:07:09		0.695402	00:03:40			0.919118	00:05:54		0.936508	00:01:40		0.940828	00:03:19		0.938462	00:05:29
	0.932292	00:03:30		0.917098	00:15:20			0.78	00:30:00		0.952381	00:04:20		0.981013	00:17:00		0.956835	00:01:09			0.637363	00:26:15		0.695402	00:17:50			0.926471	00:02:20		0.952381	00:04:20		0.946746	00:02:23		0.938462	00:02:37
	0.9375	00:01:03		0.927461	00:12:16			0.786667	00:20:23		0.952381	00:03:43		0.981013	00:02:13		0.956835	00:05:56			0.642857	00:01:34		0.712644	00:30:00			0.933824	00:25:53		0.952381	00:03:43		0.952663	00:00:35		0.938462	00:05:41
	0.9375	00:03:16		0.932642	00:04:24			0.813333	00:08:31		0.952381	00:01:50		0.981013	00:02:15		0.956835	00:03:32			0.648352	00:30:00		0.712644	00:04:05			0.948529	00:04:23		0.952381	00:01:50		0.952663	00:01:49		0.938462	00:01:30
	0.9375	00:02:21		0.932642	00:07:24			0.813333	00:30:00		0.952381	00:03:17		0.987342	00:04:00		0.956835	00:04:13			0.648352	00:02:50		0.718391	00:09:08			0.948529	00:01:13		0.952381	00:03:17		0.952663	00:02:51		0.938462	00:25:38
	0.9375	00:02:28		0.932642	00:06:32			0.813333	00:19:15		0.952381	00:04:18		0.987342	00:04:03		0.956835	00:03:32			0.664835	00:30:00		0.718391	00:11:51			0.948529	00:00:41		0.952381	00:04:18		0.952663	00:09:31		0.938462	00:03:53
	0.9375	00:01:11		0.932642	00:06:43			0.813333	00:04:00		0.952381	00:06:32		0.987342	00:02:27		0.956835	00:30:00			0.67033	00:05:25		0.718391	00:30:00			0.948529	00:03:06		0.952381	00:06:32		0.952663	00:03:18		0.938462	00:03:00
	0.942708	00:00:41		0.937824	00:30:00			0.833333	00:08:45		0.952381	00:01:13		0.987342	00:03:33		0.956835	00:06:49			0.67033	00:13:16		0.735632	00:17:10			0.948529	00:16:27		0.952381	00:01:13		0.952663	00:03:10		0.938462	00:07:57
	0.947917	00:00:46		0.937824	00:08:13			0.846667	00:20:26		0.952381	00:06:51		0.987342	00:15:44		0.956835	00:07:07			0.675824	00:05:51		0.758621	00:04:14			0.955882	00:30:00		0.952381	00:06:51		0.952663	00:05:55		0.946154	00:02:00
	0.947917	00:04:50		0.937824	00:12:55			0.853333	00:03:02		0.952381	00:05:34		0.987342	00:04:10		0.956835	00:02:02			0.686813	00:03:34		0.764368	00:30:00			0.955882	00:09:11		0.952381	00:05:34		0.95858	00:03:01		0.946154	00:02:26
	0.947917	00:00:43		0.937824	00:06:52			0.86	00:30:00		0.952381	00:05:35		0.987342	00:15:29		0.956835	00:02:02			0.697802	00:17:04		0.770115	00:15:00			0.955882	00:07:47		0.952381	00:05:35		0.95858	00:05:24		0.946154	00:02:45
	0.947917	00:04:46		0.937824	00:30:00			0.86	00:06:10		0.952381	00:01:58		0.987342	00:03:37		0.956835	00:04:04			0.708791	00:30:00		0.775862	00:14:08			0.955882	00:02:12		0.952381	00:01:58		0.95858	00:05:02		0.946154	00:04:54
	0.947917	00:04:49		0.937824	00:08:33			0.86	00:13:00		0.960317	00:02:48		0.987342	00:02:56		0.956835	00:03:53			0.708791	00:04:02		0.781609	00:10:02			0.963235	00:09:48		0.960317	00:02:48		0.95858	00:30:00		0.946154	00:05:26
		00:01:39			00:06:04				00:03:11			00:04:28			00:02:57			00:03:44				00:30:00			00:19:43				00:05:07			00:04:28			00:02:36			00:04:26
		00:02:39			00:24:57				00:30:00			00:02:02			00:03:04			00:01:50				00:30:00			00:08:01				00:13:15			00:02:02			00:03:25			00:02:19
		00:30:00			00:04:56				00:12:48			00:00:33			00:05:16			00:02:02				00:30:00			00:03:54				00:03:39			00:00:33			00:03:05			00:30:00
		00:02:55			00:03:27				00:04:29			00:03:27			00:10:31			00:03:15				00:30:00			00:00:57				00:04:19			00:03:27			00:01:29			00:01:03
		00:00:34			00:05:20				00:12:25			00:04:25			00:03:51			00:05:26				00:30:00			00:02:00				00:02:48			00:04:25			00:01:40			00:07:21
		00:08:57			00:04:22				00:06:45			00:02:41			00:00:52			00:02:17				00:28:42			00:03:32				00:05:49			00:02:41			00:03:08			00:03:18
		00:02:30			00:03:05				00:06:32			00:01:30			00:01:49			00:18:44				00:08:53			00:03:16				00:02:16			00:01:30			00:03:43			00:02:58
		00:05:18			00:09:23				00:05:51			00:04:00			00:03:55			00:07:51				00:04:33			00:05:10				00:03:39			00:04:00			00:02:33			00:08:44
		00:03:19			00:03:07				00:02:19			00:02:58			00:02:33			00:00:50				00:30:00			00:25:24				00:05:59			00:02:58			00:03:25			00:06:12
		00:01:31			00:04:27				00:30:00			00:02:05			00:03:37			00:06:37				00:07:13			00:01:51				00:05:09			00:02:05			00:04:06			00:03:29
		00:03:58			00:12:52				00:18:33			00:02:24			00:03:22			00:00:45				00:30:00			00:25:57				00:06:39			00:02:24			00:01:27			00:30:00
		00:02:53			00:13:05				00:10:50			00:03:22			00:00:51			00:02:09				00:03:38			00:05:11				00:04:54			00:03:22			00:01:47			00:01:58
		00:04:04			00:02:29				00:11:27			00:07:23			00:03:06			00:02:50				00:01:32			00:07:16				00:04:40			00:07:23			00:01:32			00:02:04
		00:05:22			00:02:44				00:13:41			00:30:00			00:03:02			00:30:00				00:22:27			00:30:00				00:04:09			00:30:00			00:02:10			00:30:00
		00:09:43			00:12:52				00:30:00			00:05:56			00:02:05			00:01:48				00:01:22			00:00:45				00:01:58			00:05:56			00:02:37			00:02:58
		00:03:13			00:20:22				00:20:25			00:03:34			00:02:19			00:00:26				00:30:00			00:30:00				00:02:14			00:03:34			00:03:27			00:07:10
		00:00:40			00:10:25				00:06:31			00:07:24			00:02:24			00:01:15				00:00:51			00:30:00				00:02:14			00:07:24			00:02:35			00:02:46
		00:04:07			00:04:08				00:06:03			00:02:11			00:02:29			00:04:45				00:01:35			00:11:26				00:05:50			00:02:11			00:04:09			00:04:13
		00:03:00			00:12:15				00:17:54			00:05:30			00:03:07			00:02:41				00:22:40			00:30:00				00:02:55			00:05:30			00:01:52			00:03:31
		00:06:34			00:07:43				00:10:40			00:02:53			00:06:37			00:02:53				00:10:02			00:09:58				00:06:24			00:02:53			00:00:57			00:01:41
		00:13:38			00:04:05				00:05:37			00:02:42			00:10:08			00:02:08				00:30:00			00:30:00				00:04:31			00:02:42			00:03:31			00:30:00
		00:05:03			00:30:00				00:30:00			00:11:28			00:03:16			00:01:50				00:01:10			00:07:31				00:06:22			00:11:28			00:05:00			00:02:13
		00:03:09			00:00:46				00:11:04			00:03:01			00:06:15			00:02:14				00:20:20			00:30:00				00:01:10			00:03:01			00:02:18			00:03:02
		00:07:26			00:08:52				00:07:35			00:03:46			00:07:11			00:03:01				00:07:00			00:08:15				00:04:12			00:03:46			00:02:15			00:01:22
		00:03:51			00:09:44				00:02:33			00:02:27			00:06:03			00:02:29				00:09:35			00:17:11				00:02:21			00:02:27			00:01:26			00:04:31
		00:01:56			00:04:15				00:04:50			00:02:19			00:02:30			00:07:20				00:23:25			00:05:33				00:01:58			00:02:19			00:03:14			00:01:28
		00:01:37			00:04:37				00:09:32			00:09:12			00:03:06			00:01:09				00:01:39			00:08:39				00:01:53			00:09:12			00:02:00			00:02:16
		00:02:23			00:02:20				00:17:01			00:02:45			00:04:08			00:04:32				00:06:04			00:02:40				00:04:48			00:02:45			00:01:15			00:02:20
		00:04:47			00:01:40				00:05:23			00:03:00			00:30:00			00:03:32				00:30:00			00:30:00				00:04:57			00:03:00			00:05:43			00:05:04
		00:03:22			00:01:41				00:02:45			00:05:43			00:03:13			00:03:38				00:30:00			00:04:22				00:03:48			00:05:43			00:06:39			00:02:06
		00:04:10			00:03:06				00:30:00			00:09:39			00:04:49			00:01:46				00:03:42			00:15:26				00:02:17			00:09:39			00:02:41			00:04:19
		00:00:41			00:01:54				00:15:03			00:01:15			00:03:49			00:03:30				00:12:51			00:01:27				00:00:36			00:01:15			00:03:03			00:04:56
		00:02:02			00:04:02				00:25:08			00:02:30			00:07:14			00:03:18				00:04:48			00:14:05				00:07:10			00:02:30			00:01:06			00:10:42
		00:01:17			00:00:46				00:02:51			00:06:19			00:03:42			00:04:13				00:07:28			00:07:00				00:02:01			00:06:19			00:30:00			00:04:33
		00:02:50			00:01:34				00:09:29			00:02:20			00:00:54			00:04:32				00:27:04			00:01:03				00:02:50			00:02:20			00:03:11			00:02:43
		00:02:52			00:07:44				00:30:00			00:04:23			00:01:42			00:03:07				00:30:00			00:13:26				00:20:27			00:04:23			00:01:36			00:04:17
		00:04:07			00:06:11				00:06:23			00:01:18			00:03:16			00:03:41				00:12:28			00:19:58				00:02:44			00:01:18			00:01:16			00:01:21
		00:02:42			00:30:00				00:09:40			00:03:11			00:00:48			00:03:33				00:30:00			00:12:47				00:20:18			00:03:11			00:09:04			00:02:15
		00:06:21			00:16:18				00:04:25			00:15:40			00:06:01			00:03:49				00:06:31			00:05:04				00:04:09			00:15:40			00:06:26			00:01:00
		00:03:36			00:30:00				00:05:31			00:08:42			00:05:19			00:03:47				00:15:15			00:05:40				00:00:51			00:08:42			00:11:15			00:02:36
		00:03:01			00:04:51				00:08:03			00:02:43			00:02:30			00:03:12				00:04:45			00:30:00				00:03:34			00:02:43			00:02:01			00:03:49
		00:03:03			00:01:31				00:17:25			00:02:18			00:05:32			00:04:06				00:30:00			00:03:55				00:02:24			00:02:18			00:01:05			00:03:47
		00:01:30			00:09:59				00:17:32			00:30:00			00:03:28			00:02:23				00:02:41			00:03:10				00:03:15			00:30:00			00:00:52			00:11:58
		00:01:34			00:30:00				00:05:10			00:02:37			00:02:33			00:03:24				00:03:55			00:30:00				00:06:38			00:02:37			00:00:32			00:02:56
		00:01:36			00:06:54				00:07:36			00:01:51			00:01:18			00:04:05				00:30:00			00:07:06				00:01:32			00:01:51			00:01:21			00:06:27
		00:03:23			00:03:21				00:02:35			00:02:41			00:03:09			00:03:31				00:07:06			00:07:20				00:02:34			00:02:41			00:04:22			00:05:32
		00:05:23			00:17:26				00:09:13			00:03:45			00:02:47			00:01:46				00:01:33			00:01:21				00:05:09			00:03:45			00:02:15			00:14:06
		00:18:14			00:13:15				00:09:26			00:09:47			00:03:09			00:01:20				00:03:15			00:02:02				00:05:45			00:09:47			00:03:50			00:03:19
		00:03:54			00:04:19				00:16:40			00:04:31			00:05:11			00:02:47				00:30:00			00:00:36				00:04:31			00:04:31			00:05:49			00:03:13
		00:05:05			00:09:19				00:30:00			00:07:36			00:05:23			00:03:20				00:02:31			00:28:09				00:06:22			00:07:36			00:03:08			00:03:24
		00:03:45			00:11:13				00:04:10			00:01:15			00:02:31			00:02:44				00:01:34			00:03:51				00:01:10			00:01:15			00:04:42			00:02:56
		00:03:30			00:09:07				00:10:13			00:01:02			00:03:07			00:01:05				00:01:56			00:03:03				00:04:12			00:01:02			00:01:39			00:01:30
		00:03:24			00:03:12				00:04:17			00:02:04			00:01:47			00:04:58				00:06:11			00:30:00				00:02:21			00:02:04			00:05:42			00:14:01
		00:03:35			00:17:31				00:01:47			00:04:25			00:02:37			00:03:00				00:03:50			00:04:10				00:30:00			00:04:25			00:03:52			00:06:55
		00:01:54			00:13:26				00:02:21			00:04:03			00:30:00			00:01:42				00:04:11			00:15:02				00:01:58			00:04:03			00:08:51			00:04:00
		00:02:47			00:30:00				00:20:38			00:06:27			00:03:31			00:05:21				00:01:01			00:04:52				00:13:57			00:06:27			00:01:00			00:03:46
		00:07:37			00:05:15				00:01:05			00:02:27			00:01:00			00:01:44				00:30:00			00:05:57				00:14:44			00:02:27			00:00:38			00:02:37
		00:02:18			00:02:43				00:02:05			00:05:55			00:01:44			00:01:33				00:30:00			00:09:39				00:09:12			00:05:55			00:03:12			00:10:32
		00:01:20			00:03:47				00:13:27			00:05:10			00:03:46			00:02:18				00:30:00			00:30:00				00:01:37			00:05:10			00:05:35			00:06:08
		00:06:04			00:02:37				00:03:03			00:18:16			00:03:07			00:01:49				00:02:33			00:14:48				00:03:20			00:18:16			00:04:47			00:06:54
		00:07:54			00:03:36				00:02:28			00:03:04			00:01:07			00:02:51				00:05:22			00:30:00				00:06:18			00:03:04			00:05:55			00:01:10
		00:00:34			00:03:08				00:01:41			00:02:08			00:03:22			00:03:07				00:05:12			00:30:00				00:02:24			00:02:08			00:01:23			00:02:07
		00:01:13			00:01:21				00:03:14			00:03:01			00:11:12			00:01:28				00:30:00			00:27:15				00:03:36			00:03:01			00:02:27			00:00:50
		00:05:06			00:03:42				00:30:00			00:02:52			00:03:37			00:05:07				00:04:05			00:24:53				00:03:42			00:02:52			00:01:39			00:03:07
		00:03:21			00:05:28				00:02:32			00:29:33			00:08:47			00:02:37				00:30:00			00:24:02				00:03:24			00:29:33			00:03:16			00:05:08
		00:03:09			00:07:43				00:03:39			00:07:31			00:03:42			00:04:23				00:04:29			00:26:47				00:03:34			00:07:31			00:01:47			00:04:11
		00:04:17			00:06:13				00:11:45			00:03:12			00:08:07			00:04:11				00:25:21			00:30:00				00:30:00			00:03:12			00:01:42			00:04:40
		00:05:09			00:04:39				00:02:43			00:03:01			00:02:20			00:02:23				00:17:45			00:06:35				00:18:39			00:03:01			00:01:16			00:07:21
		00:02:11			00:03:05				00:01:58			00:08:21			00:07:15			00:01:38				00:05:03			00:15:39				00:10:14			00:08:21			00:02:21			00:08:02
		00:04:49			00:04:13				00:30:00			00:01:22			00:03:19			00:08:27				00:30:00			00:03:30				00:02:47			00:01:22			00:06:46			00:04:29
		00:03:22			00:04:18				00:04:02			00:04:51			00:02:49			00:03:02				00:05:02			00:06:02				00:30:00			00:04:51			00:05:57			00:02:45
		00:02:25			00:02:23				00:15:33			00:03:01			00:02:25			00:02:38				00:04:10			00:05:09				00:05:09			00:03:01			00:04:14			00:14:23
		00:03:24			00:11:04				00:07:49			00:04:39			00:02:05			00:01:45				00:09:23			00:07:43				00:02:00			00:04:39			00:04:08			00:00:54
		00:04:15			00:01:55				00:10:13			00:01:51			00:07:04			00:02:53				00:30:00			00:12:21				00:07:08			00:01:51			00:03:19			00:03:08
		00:05:15			00:06:07				00:06:10			00:06:07			00:02:42			00:06:23				00:07:44			00:30:00				00:04:01			00:06:07			00:05:57			00:07:07
		00:01:57			00:30:00				00:06:26			00:04:39			00:06:25			00:13:56				00:04:13			00:02:05				00:07:36			00:04:39			00:05:14			00:03:11
		00:04:49			00:04:03				00:06:22			00:07:49			00:01:29			00:01:36				00:04:05			00:03:08				00:03:27			00:07:49			00:01:41			00:03:27
		00:02:15			00:30:00				00:06:52			00:04:21			00:00:46			00:00:54				00:30:00			00:03:41				00:03:53			00:04:21			00:07:36			00:04:29
		00:00:44			00:05:23				00:08:56			00:09:35			00:01:36			00:01:02				00:30:00			00:05:09				00:01:29			00:09:35			00:01:58			00:02:14
		00:03:04			00:05:18				00:30:00			00:02:01			00:05:48			00:01:26				00:01:47			00:02:54				00:05:51			00:02:01			00:30:00			00:02:17
		00:06:26			00:02:35				00:30:00			00:03:22			00:03:16			00:05:00				00:06:15			00:12:38				00:05:36			00:03:22			00:02:43			00:02:17
		00:06:24			00:01:06				00:04:31			00:30:00			00:02:07			00:05:06				00:03:08			00:09:06				00:03:51			00:30:00			00:04:40			00:03:28
		00:03:12			00:03:14				00:24:00			00:02:01			00:02:58			00:01:01				00:01:54			00:05:07				00:01:29			00:02:01			00:08:40			00:02:27
		00:30:00			00:04:35				00:12:48			00:04:47			00:06:50			00:02:29				00:30:00			00:02:09				00:16:16			00:04:47			00:05:10			00:04:54
		00:03:13			00:04:49				00:04:23			00:04:22			00:03:25			00:00:37				00:30:00			00:05:52				00:05:26			00:04:22			00:01:29			00:01:10
		00:06:26			00:07:28				00:02:19			00:08:47			00:05:24			00:04:58				00:05:26			00:09:25				00:07:42			00:08:47			00:04:40			00:00:45
		00:09:27			00:09:50				00:26:21			00:18:15			00:03:14			00:03:50				00:30:00			00:02:45				00:03:43			00:18:15			00:01:22			00:04:13
		00:04:06			00:06:55				00:14:40			00:10:20			00:06:17			00:02:12				00:03:55			00:08:00				00:03:13			00:10:20			00:03:53			00:00:46
		00:02:54			00:02:34				00:30:00			00:08:42			00:03:05			00:05:06				00:06:19			00:06:53				00:08:27			00:08:42			00:02:35			00:08:57
		00:03:26			00:03:43				00:02:15			00:30:00			00:01:47			00:09:09				00:30:00			00:08:51				00:04:33			00:30:00			00:30:00			00:01:19
		00:01:56			00:08:42				00:30:00			00:09:46			00:01:33			00:03:40				00:26:30			00:30:00				00:02:11			00:09:46			00:02:16			00:01:57
		00:30:00			00:30:00				00:05:52			00:03:57			00:02:43			00:00:57				00:06:06			00:09:45				00:06:53			00:03:57			00:04:20			00:06:43
		00:05:43			00:01:13				00:03:49			00:04:08			00:03:02			00:03:41				00:30:00			00:13:00				00:04:26			00:04:08			00:06:28			00:07:57
		00:10:01			00:18:22				00:30:00			00:03:51			00:02:49			00:03:00				00:10:58			00:06:07				00:30:00			00:03:51			00:03:31			00:03:07
		00:04:03			00:07:18				00:02:35			00:30:00			00:04:42			00:02:17				00:04:02			00:03:01				00:03:29			00:30:00			00:02:00			00:00:31
		00:01:48			00:12:49				00:03:21						00:04:29			00:02:14				00:01:25			00:09:20				00:05:04						00:19:47			00:01:50
		00:06:25			00:02:36				00:02:50						00:02:44			00:02:30				00:19:43			00:30:00				00:07:36						00:10:10			00:02:33
		00:02:19			00:03:43				00:04:14						00:11:25			00:02:11				00:07:24			00:07:44				00:06:39						00:30:00			00:30:00
		00:25:44			00:02:37				00:03:05						00:01:42			00:03:29				00:00:46			00:00:45				00:01:26						00:05:41			00:01:53
		00:30:00			00:03:24				00:01:48						00:03:16			00:00:30				00:30:00			00:30:00				00:12:04						00:06:44
		00:03:28			00:06:04				00:07:01						00:06:38			00:08:58				00:01:13			00:24:52				00:05:04						00:30:00
		00:01:05			00:02:58				00:00:42						00:03:27			00:01:43				00:04:50			00:08:27				00:02:38						00:12:35
		00:08:05			00:01:31				00:07:48						00:04:29			00:04:23				00:01:52			00:25:57				00:19:30						00:07:42
		00:30:00			00:02:46				00:30:00						00:01:22			00:02:08				00:05:39			00:17:34				00:15:33						00:00:48
		00:01:41			00:30:00				00:03:37						00:03:04			00:30:00				00:02:32			00:08:43				00:30:00						00:02:02
		00:07:44			00:09:55				00:02:21						00:01:42			00:02:27				00:30:00			00:06:07										00:05:17
		00:02:20			00:03:19				00:01:09						00:21:06			00:03:01				00:30:00			00:06:05										00:01:40
		00:01:08			00:02:35				00:02:06						00:03:38			00:04:02				00:11:24			00:10:23										00:02:31
		00:15:47			00:04:49				00:02:48						00:05:35							00:30:00			00:01:57										00:05:02
		00:02:21			00:11:24				00:03:57						00:01:55							00:30:00			00:13:11										00:03:42
		00:11:11			00:10:32				00:00:53						00:03:39							00:06:54			00:08:51										00:01:06
		00:01:10			00:02:46				00:04:40						00:02:08							00:04:19			00:15:25										00:02:02
		00:04:54			00:02:50				00:03:20						00:00:38							00:14:19			00:04:56										00:30:00
		00:01:45			00:07:52				00:03:54						00:01:31							00:12:26			00:30:00										00:04:33
		00:08:20			00:02:49				00:06:30						00:01:21							00:30:00			00:02:03										00:02:45
		00:05:10			00:04:40				00:04:17						00:01:54							00:04:16			00:25:43										00:02:08
		00:03:10			00:05:49				00:30:00						00:02:19							00:13:49			00:30:00										00:03:24
		00:02:23			00:01:33				00:30:00						00:06:55							00:09:26			00:03:11										00:01:00
		00:01:10			00:03:13				00:30:00						00:04:45							00:08:41			00:30:00										00:06:14
		00:30:00			00:04:46										00:03:38							00:30:00			00:07:58										00:26:38
		00:03:52			00:04:11										00:02:34							00:27:06			00:07:35										00:10:11
		00:04:26			00:04:33										00:03:45							00:18:07			00:03:35										00:01:29
		00:02:32			00:02:08										00:05:00							00:30:00			00:30:00										00:01:41
		00:25:00			00:03:34										00:03:44							00:05:36			00:30:00										00:03:08
		00:07:46			00:06:10										00:03:39							00:17:45			00:07:46										00:03:27
		00:30:00			00:05:03										00:04:00							00:13:06			00:03:36										00:02:55
		00:03:00			00:04:27										00:03:21							00:05:28			00:07:49										00:03:17
		00:13:24			00:01:53																	00:30:00			00:30:00										00:03:00
		00:01:18			00:08:29																	00:30:00			00:12:00										00:02:25
		00:04:14			00:03:42																	00:28:23			00:13:19										00:05:52
		00:30:00			00:05:52																	00:06:27			00:01:03										00:04:14
		00:01:19			00:04:40																	00:07:24			00:14:12										00:01:33
		00:30:00			00:05:02																	00:03:14			00:07:25										00:06:48
		00:05:08			00:03:47																	00:30:00			00:03:17										00:04:39
		00:01:18			00:05:07																	00:30:00			00:13:35										00:18:39
		00:01:56			00:03:09																	00:30:00			00:01:02										00:10:03
		00:03:31			00:03:53																	00:10:41			00:01:12										00:04:51
		00:06:02			00:03:10																	00:30:00			00:13:06										00:04:44
		00:01:23			00:01:14																	00:07:45			00:05:08
		00:00:53			00:03:06																	00:09:49			00:10:48
		00:03:22			00:01:03																	00:30:00			00:08:49
		00:02:10			00:05:07																	00:12:40			00:01:12
		00:02:38			00:05:17																	00:01:51			00:30:00
		00:03:51			00:03:41																	00:06:56
		00:05:49			00:02:21																	00:30:00
		00:03:35			00:02:27																	00:01:21
		00:01:47			00:03:42																	00:02:40
		00:06:48			00:03:24																	00:05:52
		00:30:00			00:30:00																	00:01:03
		00:01:59			00:05:31																	00:02:04
		00:03:30			00:02:54																	00:07:17
		00:19:11			00:04:05
		00:06:55			00:03:18
		00:01:47			00:03:40
		00:02:00			00:05:25
		00:02:34			00:04:01
		00:04:00			00:03:11
		00:02:58			00:00:51
		00:03:39			00:03:48
		00:05:57			00:01:51
		00:08:13			00:02:45
					00:03:16
