# Supplementary material for: Drosulfakinin signaling modulates female sexual receptivity in Drosophila
Source: eLife. 2022 Apr 27;11:e76025. doi: 10.7554/eLife.76025 (PMC9045819; doi:10.7554/eLife.76025)
Supplement: Figure 4—figure supplement 1—source data 1. [file elife-76025-fig4-figsupp1-data1.xlsx]

## Sheet: Sheet1
Figure 4-figure supplement 1A								Figure 4-figure supplement 1B
Genotpe	Copulation rate	StartTime	Genotpe	Copulation rate	StartTime
ΔCCKLR-17D1/ΔCCKLR-17D1	0	00:01:29	﹢/﹢	0	00:02:01			Genotpe	Copulation rate	StartTime	Genotpe	Copulation rate	StartTime	Genotpe	Copulation rate	StartTime
	0.0228571	00:02:48		0.0666667	00:01:08			elavGal4/﹢;UAS-dcr2/﹢;UAS-CCKLR-17D1 RNAi/﹢	0	00:01:45	elavGal4/﹢;UAS-dcr2/﹢;﹢/﹢	0	00:05:32	﹢/﹢;﹢/﹢;UAS-CCKLR-17D1RNAi/﹢	0	00:01:51
	0.251429	00:02:02		0.275	00:08:47				0.0240964	00:07:10		0.0267857	00:04:18		0	00:01:15
	0.514286	00:02:12		0.525	00:11:31				0.216867	00:01:12		0.107143	00:11:11		0.125	00:05:21
	0.668571	00:01:28		0.675	00:03:45				0.349398	00:30:00		0.214286	00:06:40		0.25	00:06:33
	0.765714	00:02:04		0.741667	00:02:47				0.457831	00:02:22		0.3125	00:06:13		0.385417	00:10:18
	0.811429	00:02:12		0.791667	00:03:31				0.614458	00:05:48		0.464286	00:04:15		0.479167	00:30:00
	0.862857	00:01:43		0.841667	00:03:28				0.73494	00:04:21		0.580357	00:30:00		0.5625	00:05:21
	0.88	00:01:24		0.866667	00:04:38				0.746988	00:02:53		0.705357	00:04:28		0.625	00:04:08
	0.897143	00:02:19		0.883333	00:04:47				0.831325	00:01:05		0.75	00:02:22		0.708333	00:09:05
	0.902857	00:02:36		0.891667	00:05:08				0.843373	00:00:54		0.767857	00:02:34		0.729167	00:03:49
	0.914286	00:01:29		0.891667	00:02:53				0.855422	00:03:16		0.803571	00:01:22		0.802083	00:02:10
	0.92	00:03:45		0.908333	00:30:00				0.86747	00:30:00		0.8125	00:06:50		0.833333	00:05:15
	0.92	00:30:00		0.916667	00:03:53				0.879518	00:07:48		0.830357	00:23:01		0.885417	00:18:04
	0.931429	00:01:36		0.916667	00:01:19				0.879518	00:04:28		0.839286	00:02:22		0.895833	00:01:57
	0.931429	00:00:49		0.916667	00:04:03				0.879518	00:01:25		0.848214	00:30:00		0.895833	00:02:23
	0.931429	00:01:28		0.916667	00:02:27				0.879518	00:03:07		0.857143	00:09:25		0.895833	00:15:47
	0.931429	00:02:01		0.925	00:05:12				0.879518	00:05:28		0.866071	00:06:50		0.916667	00:03:42
	0.931429	00:01:23		0.925	00:05:27				0.879518	00:04:10		0.866071	00:05:26		0.916667	00:09:14
	0.931429	00:03:07		0.925	00:02:54				0.879518	00:04:16		0.866071	00:06:41		0.916667	00:09:03
	0.937143	00:01:20		0.925	00:02:18				0.879518	00:01:52		0.866071	00:30:00		0.9375	00:07:53
	0.942857	00:03:39		0.925	00:06:37				0.879518	00:02:44		0.875	00:30:00		0.9375	00:11:05
	0.942857	00:01:25		0.925	00:03:09				0.879518	00:05:09		0.875	00:02:36		0.9375	00:06:45
	0.948571	00:02:25		0.925	00:07:26				0.879518	00:04:28		0.875	00:05:04		0.947917	00:30:00
	0.948571	00:02:50		0.925	00:02:51				0.879518	00:04:57		0.875	00:03:24		0.947917	00:08:01
	0.948571	00:00:54		0.925	00:02:20				0.891566	00:03:43		0.892857	00:09:53		0.958333	00:09:13
	0.948571	00:03:30		0.925	00:01:27				0.891566	00:00:56		0.892857	00:03:14		0.958333	00:01:05
	0.948571	00:03:17		0.933333	00:03:32				0.891566	00:02:17		0.892857	00:07:43		0.958333	00:03:01
	0.948571	00:03:41		0.933333	00:01:29				0.903614	00:03:16		0.901786	00:07:43		0.958333	00:30:00
	0.948571	00:08:55		0.933333	00:01:56				0.903614	00:01:30		0.901786	00:09:25		0.958333	00:01:27
	0.948571	00:03:14		0.933333	00:06:27				0.903614	00:03:41		0.901786	00:04:32		0.958333	00:18:34
		00:01:26			00:02:29				0.903614	00:01:16		0.901786	00:08:55		0.958333	00:03:04
		00:19:15			00:06:16					00:30:00			00:05:25			00:02:24
		00:11:36			00:00:57					00:01:32			00:04:37			00:03:17
		00:02:46			00:30:00					00:09:35			00:06:02			00:15:18
		00:02:56			00:02:01					00:05:20			00:04:24			00:01:40
		00:04:50			00:02:25					00:07:10			00:01:53			00:11:55
		00:04:07			00:02:05					00:05:50			00:01:28			00:04:23
		00:01:56			00:12:20					00:04:14			00:03:50			00:01:09
		00:02:10			00:03:09					00:30:00			00:00:53			00:06:17
		00:30:00			00:06:02					00:12:00			00:01:26			00:07:39
		00:02:17			00:11:18					00:01:22			00:30:00			00:04:05
		00:30:00			00:01:24					00:30:00			00:02:32			00:03:38
		00:02:36			00:02:02					00:05:03			00:00:45			00:03:41
		00:02:42			00:05:35					00:01:56			00:02:22			00:02:51
		00:05:00			00:05:24					00:02:45			00:11:00			00:05:00
		00:02:53			00:01:33					00:07:39			00:04:16			00:01:38
		00:04:29			00:16:24					00:03:42			00:05:47			00:06:47
		00:30:00			00:02:38					00:01:20			00:03:48			00:04:49
		00:00:55			00:02:38					00:02:43			00:04:12			00:02:38
		00:03:03			00:02:16					00:01:41			00:30:00			00:03:36
		00:03:25			00:00:42					00:02:16			00:06:29			00:04:10
		00:01:43			00:02:11					00:30:00			00:05:38			00:07:44
		00:04:36			00:01:57					00:23:24			00:07:40			00:11:14
		00:02:27			00:02:30					00:02:02			00:14:45			00:30:00
		00:01:15			00:01:33					00:01:39			00:23:46			00:02:40
		00:02:00			00:00:37					00:04:24			00:26:26			00:03:20
		00:30:00			00:01:42					00:05:02			00:03:32			00:02:32
		00:01:45			00:03:27					00:02:38			00:05:39			00:04:18
		00:02:23			00:01:37					00:30:00			00:08:46			00:07:17
		00:05:02			00:01:43					00:03:20			00:19:47			00:01:16
		00:07:14			00:02:32					00:04:39			00:04:33			00:08:49
		00:10:56			00:03:26					00:04:37			00:04:27			00:09:23
		00:03:05			00:02:00					00:30:00			00:05:00			00:05:38
		00:03:37			00:06:27					00:04:48			00:06:35			00:03:32
		00:22:54			00:03:02					00:26:02			00:05:26			00:05:30
		00:03:36			00:03:11					00:10:15			00:05:54			00:07:33
		00:03:57			00:03:11					00:06:40			00:05:56			00:07:45
		00:02:02			00:26:33					00:03:36			00:10:18			00:02:28
		00:04:07			00:01:20					00:02:06			00:13:41			00:10:14
		00:02:11			00:06:17					00:08:11			00:30:00			00:03:18
		00:04:07			00:03:13					00:02:50			00:30:00			00:05:09
		00:04:23			00:30:00					00:01:48			00:02:18			00:21:44
		00:02:39			00:04:25					00:07:28			00:15:22			00:09:53
		00:03:09			00:01:26					00:01:35			00:30:00			00:01:32
		00:01:03			00:03:03					00:04:20			00:03:55			00:11:35
		00:03:26			00:02:36					00:07:48			00:06:46			00:12:16
		00:02:30			00:01:42					00:03:44			00:12:17			00:01:37
		00:01:55			00:01:52					00:07:10			00:03:25			00:04:37
		00:01:29			00:03:28					00:01:40			00:04:58			00:02:05
		00:01:58			00:07:33					00:05:06			00:07:12			00:06:46
		00:04:00			00:02:54					00:05:25			00:05:34			00:02:53
		00:02:00			00:01:58					00:05:19			00:05:30			00:06:38
		00:02:28			00:07:25					00:04:09			00:03:43			00:11:06
		00:06:23			00:02:52								00:05:27			00:07:24
		00:20:39			00:30:00								00:01:10			00:01:30
		00:01:30			00:02:39								00:02:04			00:05:31
		00:05:11			00:02:45								00:01:05			00:03:45
		00:04:13			00:00:55								00:02:55			00:03:07
		00:02:22			00:05:08								00:00:47			00:10:51
		00:02:53			00:00:46								00:30:00			00:05:38
		00:30:00			00:04:31								00:02:24			00:07:15
		00:02:30			00:03:41								00:06:24			00:09:31
		00:02:54			00:01:51								00:30:00			00:23:57
		00:03:15			00:01:33								00:06:26			00:02:18
		00:01:11			00:01:14								00:03:27			00:02:42
		00:01:56			00:04:20								00:04:53			00:04:17
		00:04:45			00:01:00								00:07:50
		00:04:37			00:03:35								00:04:20
		00:01:09			00:00:49								00:06:57
		00:06:10			00:04:20								00:04:42
		00:01:31			00:01:30								00:06:02
		00:02:12			00:02:16								00:04:00
		00:02:45			00:01:50								00:03:31
		00:05:21			00:30:00								00:02:26
		00:03:09			00:30:00								00:06:15
		00:05:40			00:09:01								00:01:56
		00:04:49			00:02:30								00:04:50
		00:03:52			00:03:02								00:03:04
		00:02:11			00:00:59								00:09:11
		00:02:16			00:02:35								00:01:09
		00:02:10			00:01:36								00:02:07
		00:07:34			00:02:22								00:01:34
		00:02:30			00:01:37
		00:04:28			00:02:16
		00:01:05			00:30:00
		00:06:18			00:04:02
		00:13:37			00:01:28
		00:30:00			00:30:00
		00:00:43			00:08:02
		00:01:42
		00:02:37
		00:01:22
		00:02:21
		00:01:58
		00:02:38
		00:01:42
		00:05:26
		00:09:10
		00:13:41
		00:06:23
		00:02:42
		00:04:38
		00:04:03
		00:01:30
		00:03:43
		00:01:21
		00:03:42
		00:01:15
		00:03:14
		00:03:11
		00:08:04
		00:06:56
		00:02:29
		00:04:12
		00:03:45
		00:01:35
		00:30:00
		00:07:52
		00:02:34
		00:01:48
		00:30:00
		00:02:52
		00:03:15
		00:06:49
		00:08:13
		00:05:17
		00:03:06
		00:05:31
		00:02:39
		00:01:59
		00:01:03
		00:01:41
		00:01:57
		00:03:06
		00:03:37
		00:10:56
		00:02:42
		00:01:28
		00:06:18
		00:06:55
		00:05:25
		00:06:32
		00:02:32
		00:01:42
