# Supplementary material for: Drosulfakinin signaling modulates female sexual receptivity in Drosophila
Source: eLife. 2022 Apr 27;11:e76025. doi: 10.7554/eLife.76025 (PMC9045819; doi:10.7554/eLife.76025)
Supplement: Figure 4—figure supplement 2—source data 1. [file elife-76025-fig4-figsupp2-data1.xlsx]

## Sheet: Sheet1
Figure 4-figure supplement 2A											Figure 4-figure supplement 2B							Figure 4-figure supplement 2C							Figure 4-figure supplement 2D							Figure 4-figure supplement 2E
Genotpe	Copulation rate	StartTime	Genotpe	Copulation rate	StartTime	Genotpe	Copulation rate	StartTime			Genotpe	Copulation rate	StartTime	Genotpe	Copulation rate	StartTime		Genotpe	Copulation rate	StartTime	Genotpe	Copulation rate	StartTime		Genotpe	Copulation rate	StartTime	Genotpe	Copulation rate	StartTime		Genotpe	Copulation rate	StartTime	Genotpe	Copulation rate	StartTime
elavGal4/﹢;UAS-dcr2/﹢;UAS-CCKLR-17D3 RNAi/﹢	0	00:30:00	elavGal4/﹢;UAS-dcr2/﹢;﹢/﹢	0	00:01:28	﹢/﹢;﹢/﹢;UAS-CCKLR-17D3RNAi/﹢	0	00:05:22			CCKLR-17D3GAL4/﹢;﹢/﹢;UAS-CCKLR-17D3 RNAi/﹢	0	00:13:05	CCKLR-17D3GAL4/﹢;﹢/﹢;﹢/﹢	0	00:04:02		﹢/﹢;UAS-dcr2/﹢;UAS-CCKLR-17D3 RNAi/elav-GS RU486﹢	0	00:10:29	﹢/﹢;UAS-dcr2/﹢;UAS-CCKLR-17D3 RNAi/elav-GS RU486﹣	0	00:03:19		﹢/﹢;UAS-dcr2/﹢;﹢/elav-GS RU486﹢	0	00:02:54	﹢/﹢;UAS-dcr2/﹢;﹢/elav-GS RU486﹣	0	00:04:55		﹢/﹢;﹢/﹢;UAS-CCKLR-17D3 RNAi/﹢ RU486﹢	0	00:07:26	﹢/﹢;﹢/﹢;UAS-CCKLR-17D3 RNAi/﹢ RU486﹣	0	00:02:15
	0	00:30:00		0.0220588	00:03:50		0	00:02:50				0.0512821	00:04:00		0.15942	00:01:19			0	00:30:00		0.013986	00:01:55			0.023622	00:03:49		0.0310078	00:10:31			0	00:03:01		0.0138889	00:05:56
	0.0258065	00:30:00		0.102941	00:00:53		0.0397351	00:03:34				0.211538	00:14:36		0.456522	00:01:50			0.041958	00:03:33		0.118881	00:04:02			0.149606	00:07:35		0.139535	00:02:02			0.057377	00:03:02		0.0902778	00:05:32
	0.116129	00:19:57		0.220588	00:01:26		0.13245	00:04:57				0.410256	00:03:15		0.681159	00:01:18			0.118881	00:30:00		0.293706	00:04:37			0.362205	00:03:33		0.364341	00:01:55			0.237705	00:05:51		0.215278	00:03:39
	0.187097	00:12:55		0.338235	00:30:00		0.278146	00:03:12				0.564103	00:05:11		0.797101	00:02:31			0.230769	00:30:00		0.447552	00:01:39			0.519685	00:02:00		0.527132	00:02:58			0.42623	00:03:22		0.402778	00:06:09
	0.258065	00:15:10		0.507353	00:02:32		0.456954	00:07:11				0.653846	00:03:30		0.876812	00:00:42			0.328671	00:11:35		0.559441	00:05:37			0.637795	00:03:48		0.651163	00:02:52			0.639344	00:02:34		0.597222	00:02:57
	0.316129	00:30:00		0.617647	00:00:45		0.549669	00:06:11				0.769231	00:02:32		0.905797	00:01:48			0.412587	00:02:41		0.643357	00:02:41			0.732283	00:10:11		0.713178	00:06:41			0.704918	00:04:07		0.6875	00:07:23
	0.354839	00:30:00		0.742647	00:02:22		0.602649	00:04:40				0.801282	00:10:22		0.942029	00:01:13			0.468531	00:04:10		0.692308	00:03:53			0.80315	00:04:56		0.767442	00:03:19			0.778689	00:30:00		0.805556	00:04:09
	0.4	00:21:00		0.794118	00:11:00		0.688742	00:07:54				0.826923	00:16:38		0.949275	00:03:36			0.524476	00:07:29		0.727273	00:04:16			0.850394	00:02:51		0.844961	00:05:44			0.844262	00:04:19		0.840278	00:06:47
	0.43871	00:21:48		0.808824	00:04:16		0.748344	00:03:00				0.846154	00:03:53		0.956522	00:00:56			0.622378	00:06:17		0.776224	00:05:42			0.889764	00:01:04		0.860465	00:10:19			0.868852	00:02:25		0.888889	00:01:56
	0.458065	00:30:00		0.838235	00:05:47		0.801325	00:02:54				0.871795	00:07:36		0.956522	00:01:08			0.643357	00:07:23		0.79021	00:02:42			0.913386	00:04:04		0.875969	00:09:24			0.893443	00:02:07		0.902778	00:07:57
	0.509677	00:03:14		0.845588	00:03:48		0.827815	00:07:11				0.884615	00:08:53		0.963768	00:03:24			0.692308	00:08:12		0.797203	00:04:24			0.944882	00:01:11		0.937984	00:03:13			0.901639	00:30:00		0.909722	00:03:44
	0.522581	00:10:56		0.860294	00:04:12		0.854305	00:30:00				0.903846	00:13:27		0.971014	00:01:11			0.727273	00:13:25		0.811189	00:02:53			0.952756	00:04:16		0.945736	00:02:46			0.901639	00:02:38		0.930556	00:04:18
	0.548387	00:30:00		0.867647	00:06:29		0.860927	00:30:00				0.903846	00:07:11		0.971014	00:01:40			0.741259	00:08:10		0.832168	00:02:13			0.952756	00:06:38		0.953488	00:06:16			0.92623	00:10:39		0.9375	00:04:49
	0.567742	00:17:28		0.875	00:05:38		0.874172	00:03:34				0.923077	00:03:40		0.971014	00:01:21			0.762238	00:04:00		0.839161	00:02:56			0.96063	00:09:20		0.96124	00:07:15			0.92623	00:07:43		0.9375	00:03:21
	0.6	00:06:21		0.882353	00:07:40		0.907285	00:07:48				0.942308	00:14:54		0.978261	00:03:17			0.776224	00:08:17		0.846154	00:03:33			0.968504	00:02:41		0.96124	00:04:35			0.92623	00:17:46		0.9375	00:04:32
	0.619355	00:08:02		0.889706	00:04:37		0.913907	00:07:57				0.948718	00:05:13		0.985507	00:03:35			0.79021	00:08:58		0.853147	00:01:07			0.976378	00:02:27		0.96124	00:03:34			0.934426	00:01:14		0.9375	00:06:35
	0.632258	00:05:10		0.889706	00:06:02		0.927152	00:03:10				0.955128	00:30:00		0.985507	00:01:31			0.804196	00:30:00		0.86014	00:04:53			0.976378	00:05:54		0.968992	00:08:47			0.934426	00:04:19		0.944444	00:04:01
	0.63871	00:10:19		0.889706	00:04:24		0.933775	00:05:34				0.955128	00:02:29		0.985507	00:02:40			0.825175	00:03:57		0.86014	00:01:02			0.976378	00:06:45		0.968992	00:05:05			0.942623	00:03:51		0.951389	00:30:00
	0.63871	00:05:53		0.889706	00:03:32		0.940397	00:03:36				0.955128	00:02:35		0.985507	00:01:50			0.832168	00:06:16		0.86014	00:03:10			0.976378	00:02:35		0.968992	00:07:56			0.959016	00:03:24		0.951389	00:01:44
	0.664516	00:15:17		0.897059	00:05:39		0.940397	00:04:36				0.955128	00:02:10		0.985507	00:01:06			0.839161	00:06:29		0.86014	00:01:11			0.976378	00:01:56		0.968992	00:30:00			0.959016	00:08:53		0.951389	00:09:45
	0.670968	00:10:05		0.897059	00:08:46		0.94702	00:02:48				0.961538	00:05:07		0.985507	00:02:21			0.846154	00:13:16		0.86014	00:02:48			0.976378	00:02:55		0.968992	00:04:19			0.959016	00:04:03		0.951389	00:04:13
	0.677419	00:19:06		0.897059	00:19:47		0.953642	00:07:00				0.967949	00:05:28		0.985507	00:00:37			0.853147	00:07:05		0.86014	00:01:24			0.976378	00:03:30		0.968992	00:01:17			0.959016	00:06:13		0.951389	00:02:45
	0.677419	00:23:48		0.897059	00:04:33		0.953642	00:06:09				0.967949	00:09:18		0.985507	00:02:25			0.867133	00:13:00		0.86014	00:02:03			0.976378	00:06:06		0.968992	00:05:32			0.959016	00:05:39		0.951389	00:04:12
	0.696774	00:10:04		0.911765	00:04:27		0.953642	00:04:11				0.967949	00:03:38		0.985507	00:02:32			0.874126	00:30:00		0.867133	00:05:09			0.976378	00:10:06		0.968992	00:01:00			0.959016	00:07:49		0.951389	00:08:26
	0.703226	00:06:30		0.911765	00:05:00		0.953642	00:09:04				0.974359	00:21:35		0.985507	00:01:09			0.874126	00:06:26		0.867133	00:02:51			0.976378	00:02:59		0.968992	00:05:22			0.959016	00:03:34		0.951389	00:06:58
	0.716129	00:04:11		0.911765	00:06:35		0.953642	00:03:51				0.974359	00:14:30		0.985507	00:02:33			0.881119	00:03:02		0.874126	00:02:51			0.976378	00:04:43		0.968992	00:05:04			0.959016	00:06:39		0.951389	00:16:39
	0.716129	00:14:09		0.919118	00:05:26		0.953642	00:03:04				0.974359	00:01:28		0.985507	00:01:33			0.881119	00:04:47		0.874126	00:03:04			0.976378	00:09:21		0.968992	00:11:10			0.959016	00:07:36		0.951389	00:02:58
	0.716129	00:30:00		0.919118	00:05:54		0.953642	00:08:46				0.974359	00:13:35		0.985507	00:04:00			0.881119	00:03:44		0.874126	00:02:32			0.976378	00:08:38		0.968992	00:01:57			0.959016	00:04:43		0.951389	00:03:47
	0.716129	00:06:58		0.919118	00:05:56		0.960265	00:09:34				0.974359	00:01:46		0.985507	00:01:26			0.881119	00:06:00		0.874126	00:02:41			0.976378	00:05:02		0.968992	00:12:32			0.959016	00:09:22		0.958333	00:03:31
	0.735484	00:15:28		0.919118	00:10:18		0.960265	00:30:00				0.980769	00:15:53		0.985507	00:03:32			0.881119	00:02:41		0.881119	00:03:15			0.984252	00:03:08		0.976744	00:04:36			0.959016	00:03:29		0.972222	00:01:37
		00:08:01			00:13:41			00:07:42					00:03:35			00:04:43				00:04:06			00:30:00				00:03:50			00:01:26				00:03:03			00:02:27
		00:29:26			00:02:36			00:09:07					00:04:24			00:00:23				00:08:06			00:03:55				00:08:54			00:02:20				00:04:29			00:04:18
		00:14:06			00:05:04			00:03:14					00:02:49			00:00:50				00:08:36			00:07:51				00:01:54			00:02:36				00:02:36			00:04:48
		00:03:31			00:03:24			00:04:28					00:02:38			00:01:49				00:21:01			00:23:35				00:06:38			00:30:00				00:03:51			00:03:53
		00:30:00			00:04:53			00:03:29					00:05:18			00:02:41				00:17:02			00:05:33				00:03:19			00:13:03				00:03:02			00:02:54
		00:05:53			00:07:50			00:07:32					00:01:10			00:02:13				00:03:47			00:01:41				00:05:39			00:04:24				00:02:45			00:28:05
		00:10:15			00:04:20			00:08:04					00:02:32			00:02:47				00:30:00			00:30:00				00:15:04			00:07:07				00:04:39			00:04:01
		00:14:55			00:06:57			00:01:57					00:05:47			00:01:20				00:10:34			00:04:20				00:04:09			00:04:18				00:07:23			00:05:20
		00:06:37			00:04:42			00:04:45					00:09:34			00:01:02				00:30:00			00:04:43				00:02:23			00:10:01				00:07:13			00:02:25
		00:30:00			00:06:02			00:02:53					00:04:14			00:01:18				00:06:06			00:01:22				00:07:03			00:04:31				00:30:00			00:06:35
		00:25:57			00:04:00			00:04:19					00:04:35			00:01:18				00:11:49			00:05:40				00:07:22			00:07:27				00:02:07			00:03:28
		00:10:32			00:30:00			00:04:28					00:02:26			00:04:26				00:19:26			00:03:36				00:07:46			00:07:02				00:05:07			00:04:30
		00:30:00			00:30:00			00:04:54					00:05:51			00:01:47				00:08:04			00:02:45				00:06:12			00:02:56				00:06:34			00:00:51
		00:13:46			00:01:09			00:08:36					00:09:02			00:01:29				00:04:36			00:07:29				00:05:04			00:06:26				00:03:36			00:04:57
		00:12:26			00:02:07			00:04:29					00:05:51			00:00:30				00:02:57			00:05:27				00:14:58			00:02:15				00:18:05			00:06:49
		00:08:56			00:01:34			00:05:19					00:04:03			00:02:28				00:15:11			00:02:13				00:04:11			00:02:56				00:15:18			00:01:53
		00:30:00			00:03:04			00:01:37					00:02:20			00:01:46				00:30:00			00:03:15				00:03:34			00:00:51				00:05:57			00:02:57
		00:03:46			00:09:11			00:04:19					00:02:45			00:01:54				00:08:23			00:01:22				00:02:56			00:04:07				00:02:35			00:01:00
		00:30:00			00:03:31			00:03:24					00:08:22			00:00:56				00:05:28			00:30:00				00:02:48			00:06:29				00:06:00			00:04:02
		00:10:10			00:02:26			00:05:02					00:02:31			00:00:54				00:12:31			00:03:50				00:03:43			00:03:27				00:04:11			00:05:20
		00:30:00			00:06:15			00:06:06					00:02:45			00:02:26				00:14:24			00:03:04				00:01:30			00:07:20				00:04:05			00:03:21
		00:30:00			00:01:56			00:05:07					00:05:32			00:00:46				00:23:22			00:07:23				00:00:45			00:10:16				00:02:35			00:02:21
		00:04:36			00:04:50			00:04:26					00:02:11			00:00:39				00:07:39			00:30:00				00:02:56			00:02:29				00:04:37			00:03:36
		00:30:00			00:04:04			00:05:33					00:04:18			00:03:18				00:01:05			00:04:42				00:05:16			00:04:04				00:05:58			00:04:11
		00:04:48			00:04:28			00:30:00					00:05:43			00:01:34				00:10:04			00:08:38				00:00:45			00:02:46				00:04:12			00:02:21
		00:09:53			00:03:36			00:01:16					00:05:07			00:01:57				00:05:46			00:02:44				00:02:58			00:03:15				00:03:39			00:30:00
		00:03:33			00:07:19			00:06:01					00:03:49			00:01:14				00:02:21			00:09:14				00:04:03			00:05:05				00:07:02			00:03:09
		00:04:51			00:02:02			00:02:46					00:02:24			00:00:44				00:10:40			00:10:45				00:06:18			00:07:08				00:04:53			00:06:04
		00:02:45			00:02:27			00:08:10					00:03:09			00:01:39				00:07:40			00:05:15				00:02:19			00:16:49				00:03:37			00:07:39
		00:05:20			00:03:35			00:03:57					00:08:05			00:00:58				00:05:02			00:04:27				00:03:26			00:02:22				00:02:04			00:04:01
		00:16:38			00:06:01			00:03:09					00:00:58			00:01:25				00:17:00			00:08:08				00:11:58			00:07:36				00:04:17			00:01:26
		00:30:00			00:06:49			00:02:39					00:00:55			00:02:17				00:07:53			00:01:31				00:10:28			00:03:34				00:12:30			00:01:38
		00:01:33			00:01:07			00:09:06					00:03:38			00:04:30				00:05:26			00:12:49				00:02:11			00:01:41				00:01:43			00:01:32
		00:14:14			00:03:40			00:05:29					00:03:34			00:01:07				00:08:26			00:04:18				00:01:47			00:03:39				00:06:01			00:30:00
		00:30:00			00:04:33			00:04:32					00:00:50			00:02:55				00:11:53			00:30:00				00:05:00			00:03:38				00:03:42			00:03:27
		00:14:35			00:02:18			00:03:07					00:03:11			00:04:04				00:15:33			00:06:10				00:04:00			00:07:36				00:03:06			00:01:34
		00:06:26			00:15:22			00:04:55					00:04:20			00:02:19				00:10:09			00:03:50				00:30:00			00:02:33				00:02:04			00:01:43
		00:30:00			00:30:00			00:16:08					00:09:16			00:02:55				00:04:02			00:30:00				00:02:51			00:04:35				00:02:28			00:03:50
		00:30:00			00:03:55			00:05:40					00:03:33			00:02:45				00:14:41			00:05:31				00:05:03			00:03:45				00:05:06			00:30:00
		00:04:24			00:06:46			00:07:09					00:01:54			00:00:39				00:01:47			00:04:31				00:01:30			00:02:18				00:09:32			00:08:50
		00:30:00			00:12:17			00:20:14					00:03:41			00:02:00				00:02:31			00:11:00				00:04:49			00:05:35				00:02:51			00:06:17
		00:02:28			00:03:25			00:02:38					00:06:03			00:00:56				00:07:25			00:05:22				00:01:07			00:04:13				00:05:14			00:04:45
		00:23:58			00:04:58			00:08:39					00:02:01			00:06:27				00:25:45			00:30:00				00:03:48			00:01:27				00:04:00			00:04:16
		00:30:00			00:07:12			00:09:08					00:02:46			00:01:05				00:05:14			00:29:15				00:05:01			00:06:48				00:04:52			00:03:38
		00:30:00			00:05:34			00:04:55					00:04:33			00:04:54				00:04:13			00:16:25				00:02:21			00:10:15				00:01:57			00:08:12
		00:07:40			00:05:30			00:02:44					00:11:39			00:06:36				00:03:24			00:01:32				00:02:56			00:10:04				00:03:42			00:01:53
		00:30:00			00:03:43			00:10:55					00:05:00			00:01:06				00:05:41			00:02:22				00:08:49			00:01:26				00:02:41			00:05:18
		00:12:14			00:05:27			00:02:37					00:05:11			00:01:38				00:06:07			00:04:07				00:05:40			00:02:33				00:02:14			00:06:00
		00:12:01			00:01:10			00:09:23					00:05:00			00:05:32				00:30:00			00:04:22				00:01:41			00:06:15				00:02:56			00:06:16
		00:25:13			00:02:04			00:04:35					00:05:55			00:00:40				00:04:44			00:03:36				00:13:57			00:10:42				00:12:42			00:30:00
		00:07:56			00:01:05			00:03:06					00:03:21			00:06:01				00:01:21			00:01:45				00:02:24			00:07:04				00:06:47			00:08:40
		00:10:25			00:02:55			00:04:25					00:01:32			00:01:06				00:05:34			00:08:50				00:03:15			00:04:29				00:08:37			00:06:10
		00:02:26			00:00:47			00:14:33					00:05:18			00:01:42				00:08:17			00:00:57				00:01:41			00:02:28				00:30:00			00:07:46
		00:30:00			00:30:00			00:02:47					00:03:09			00:01:56				00:30:00			00:09:50				00:05:37			00:02:42				00:04:01			00:03:51
		00:30:00			00:02:24			00:02:03					00:03:04			00:00:42				00:05:34			00:02:00				00:08:13			00:04:24				00:06:32			00:03:41
		00:02:36			00:06:24			00:04:53					00:03:34			00:02:35				00:08:33			00:02:25				00:03:04			00:02:55				00:02:07			00:04:43
		00:30:00			00:30:00			00:06:28					00:02:44			00:02:17				00:11:37			00:06:19				00:05:27			00:03:41				00:04:49			00:03:30
		00:02:56			00:06:26			00:11:42					00:03:00			00:00:28				00:08:29			00:03:58				00:02:37			00:02:49				00:08:34			00:03:38
		00:09:42			00:03:27			00:14:08					00:04:54			00:03:11				00:10:51			00:03:06				00:09:24			00:01:34				00:04:34			00:03:17
		00:05:29			00:04:34			00:07:55					00:30:00			00:06:49				00:01:51			00:03:18				00:03:19			00:03:26				00:03:27			00:04:12
		00:03:54			00:05:09			00:01:46					00:02:35			00:03:04				00:03:58			00:30:00				00:02:14			00:02:30				00:04:25			00:10:12
		00:29:10			00:05:41			00:05:21					00:02:50			00:03:05				00:22:15			00:30:00				00:01:37			00:08:12				00:03:12			00:04:16
		00:09:23			00:01:14			00:07:46					00:00:50			00:03:52				00:04:44			00:08:40				00:30:00			00:03:27				00:12:03			00:02:52
		00:02:11			00:07:00			00:13:52					00:01:45			00:02:11				00:09:57			00:04:28				00:04:22			00:03:50				00:06:08			00:02:47
		00:05:49			00:04:20			00:02:25					00:02:13			00:01:24				00:05:11			00:02:41				00:03:36			00:03:35				00:03:20			00:05:01
		00:30:00			00:03:46			00:04:52					00:01:33			00:02:21				00:30:00			00:03:23				00:07:06			00:03:18				00:01:42			00:30:00
		00:30:00			00:07:24			00:05:21					00:11:16			00:03:10				00:08:16			00:30:00				00:04:56			00:03:12				00:04:22			00:12:25
		00:03:00			00:02:44			00:30:00					00:10:11			00:00:57				00:03:34			00:02:38				00:03:18			00:00:43				00:05:35			00:02:14
		00:13:32			00:03:40			00:04:23					00:24:23			00:02:03				00:10:52			00:12:21				00:00:48			00:01:11				00:03:05			00:07:49
		00:30:00			00:04:53			00:03:12					00:01:12			00:02:01				00:16:16			00:30:00				00:04:34			00:02:30				00:03:58			00:03:47
		00:07:28			00:02:57			00:13:05					00:01:49			00:00:39				00:08:10			00:04:30				00:01:15			00:02:39				00:02:09			00:03:04
		00:01:02			00:05:32			00:04:34					00:05:13			00:02:41				00:09:52			00:08:01				00:07:26			00:00:51				00:30:00			00:05:31
		00:08:10			00:04:18			00:03:55					00:11:45			00:01:29				00:05:40			00:02:00				00:01:24			00:04:53				00:09:55			00:09:30
		00:07:26			00:11:11			00:05:05					00:00:54			00:02:17				00:03:44			00:14:34				00:01:02			00:03:48				00:04:51			00:04:45
		00:19:22			00:06:40			00:09:58					00:20:02			00:04:30				00:18:50			00:01:53				00:04:30			00:03:30				00:02:20			00:05:16
		00:07:12			00:06:13			00:03:37					00:03:27			00:01:07				00:03:30			00:06:04				00:30:00			00:30:00				00:03:39			00:04:26
		00:05:31			00:04:15			00:03:37					00:05:12			00:02:55				00:02:19			00:06:47				00:02:56			00:02:14				00:18:01			00:06:28
		00:30:00			00:30:00			00:06:06					00:02:42			00:04:04				00:02:33			00:03:50				00:03:28			00:03:06				00:02:22			00:04:35
		00:03:44			00:04:28			00:07:47					00:01:50			00:02:19				00:30:00			00:03:00				00:04:58			00:06:28				00:03:42			00:03:51
		00:30:00			00:02:22			00:07:13					00:07:14			00:02:55				00:04:48			00:03:26				00:03:15			00:01:44				00:06:13			00:03:10
		00:29:33			00:02:34			00:05:37					00:02:44			00:02:45				00:30:00			00:01:18				00:06:03			00:02:13				00:04:01			00:05:29
		00:08:58			00:30:00			00:08:56					00:05:43			00:00:39				00:03:42			00:30:00				00:03:03			00:09:30				00:04:02			00:06:29
		00:02:22			00:06:50			00:05:54					00:06:03			00:02:00				00:04:27			00:01:50				00:02:25			00:05:06				00:02:12			00:08:16
		00:04:00			00:23:01			00:12:06					00:03:02			00:04:10				00:06:21			00:00:27				00:02:27			00:03:56				00:03:00			00:08:27
		00:30:00			00:02:22			00:04:54					00:04:41			00:03:03				00:04:43			00:02:29				00:01:46			00:10:14				00:01:49			00:04:10
		00:02:22			00:30:00			00:10:56					00:02:47			00:03:47				00:12:06			00:02:17				00:03:05			00:01:37				00:01:10			00:05:23
		00:03:36			00:09:25			00:03:34					00:03:17			00:00:43				00:17:57			00:30:00				00:06:41			00:02:25				00:04:11			00:03:24
		00:19:13			00:06:50			00:05:49					00:03:00			00:03:32				00:22:46			00:03:11				00:05:55			00:01:43				00:04:27			00:02:00
		00:11:46			00:30:00			00:08:58					00:02:15			00:02:24				00:30:00			00:02:32				00:02:06			00:02:38				00:04:19			00:06:29
		00:30:00			00:06:41			00:04:34					00:01:26			00:14:47				00:11:00			00:05:47				00:05:18			00:04:06				00:01:20			00:04:46
		00:30:00			00:30:00			00:04:47					00:04:03			00:06:08				00:30:00			00:25:22				00:02:01			00:03:47				00:07:36			00:03:33
		00:23:41			00:26:26			00:10:37					00:03:07			00:05:58				00:09:52			00:08:12				00:08:34			00:04:04							00:05:43
		00:30:00			00:03:14			00:17:53					00:03:07			00:08:22				00:30:00			00:14:00				00:02:20			00:01:56							00:03:23
		00:13:46			00:07:43			00:07:03					00:01:12			00:30:00				00:03:16			00:05:09				00:06:24			00:01:43							00:02:16
		00:01:45			00:05:26			00:28:35					00:01:55			00:11:00				00:02:09			00:08:58				00:01:43			00:02:43							00:06:43
		00:04:44			00:09:53			00:08:23					00:02:26			00:15:28				00:05:31			00:30:00				00:10:56			00:02:39							00:04:13
		00:04:48			00:01:22			00:02:58					00:00:51			00:05:10				00:01:47			00:30:00							00:30:00							00:02:54
		00:25:00			00:01:53			00:18:44					00:01:25			00:03:09				00:20:32			00:07:09							00:02:42							00:04:30
		00:03:00			00:07:43			00:06:47					00:01:54			00:01:06				00:05:15			00:07:00														00:11:35
		00:11:31			00:09:25			00:03:39					00:05:20			00:04:15				00:02:39			00:07:14														00:17:58
		00:05:08			00:04:32			00:15:53					00:00:54			00:00:25				00:03:46			00:11:12														00:11:20
		00:07:17			00:08:55			00:30:00					00:01:55			00:03:26				00:02:14			00:15:20														00:02:52
		00:02:11			00:05:25			00:04:40					00:01:15			00:01:10				00:05:00			00:30:00														00:02:19
		00:03:54			00:14:45			00:21:54					00:01:57			00:30:00				00:16:09			00:04:36														00:05:13
		00:07:08			00:23:46			00:04:34					00:00:50			00:07:04				00:07:44			00:05:08														00:06:15
		00:08:40						00:01:35					00:03:52			00:10:58				00:03:12			00:03:28														00:11:50
		00:04:35						00:03:07					00:02:40			00:05:45				00:01:04			00:06:27														00:03:34
		00:30:00						00:03:20					00:03:50							00:03:20			00:30:00														00:04:18
		00:03:12						00:12:00					00:01:01							00:03:44			00:12:01														00:08:31
		00:04:35						00:08:53					00:06:46							00:04:39			00:02:44														00:06:19
		00:04:06						00:01:46					00:01:34							00:02:25			00:06:34														00:03:20
		00:16:07						00:11:29					00:07:38							00:30:00			00:03:42														00:05:36
		00:30:00						00:14:45					00:04:15																								00:01:50
		00:30:00						00:11:04					00:01:05
		00:03:00						00:10:33					00:30:00
		00:05:02						00:09:33					00:06:17
		00:03:03						00:14:42					00:01:04
		00:02:23						00:14:52					00:01:01
		00:01:02						00:04:50					00:06:23
		00:06:48						00:16:15					00:01:04
		00:30:00											00:02:01
		00:03:34											00:02:33
		00:02:08											00:01:47
		00:30:00											00:02:13
													00:30:00
