# Supplementary material for: Drosulfakinin signaling modulates female sexual receptivity in Drosophila
Source: eLife. 2022 Apr 27;11:e76025. doi: 10.7554/eLife.76025 (PMC9045819; doi:10.7554/eLife.76025)
Supplement: Figure 4—figure supplement 3—source data 1. [file elife-76025-fig4-figsupp3-data1.xlsx]

## Sheet: Sheet1
Figure 4-figure supplement 3A								Figure 4-figure supplement 3B
	Mean velocity(mm/s)		Mean velocity(mm/s)		Mean velocity(mm/s)				Mean velocity(mm/s)		Mean velocity(mm/s)		Mean velocity(mm/s)		Mean velocity(mm/s)		Mean velocity(mm/s)
﹢/﹢	2.00333	+/ΔCCKLR-17D3	2.00892	ΔCCKLR-17D3/ΔCCKLR-17D3	1.76158			elavGal4/﹢;UAS-dcr2/﹢;﹢/﹢	1.55008	﹢/﹢;﹢/﹢;UAS-CCKLR-17D3RNAi/﹢	1.90985	CCKLR-17D3GAL4/﹢;﹢/﹢;﹢/﹢	1.42989	elavGal4/﹢;UAS-dcr2/﹢;UAS-CCKLR-17D3 RNAi/﹢	2.40242	CCKLR-17D3GAL4/﹢;﹢/﹢;UAS-CCKLR-17D3 RNAi/﹢	1.35675
	1.48843		2.16388		1.95576				1.58424		1.14144		1.85285		1.68873		2.07942
	2.17157		1.49941		3.21862				1.24265		2.23296		2.10529		1.48601		1.71653
	2.40701		2.24814		1.7769				1.74365		1.88691		2.20985		2.14166		1.55412
	2.41233		2.00914		1.92419				2.21555		2.36582		1.26321		1.72899		2.37859
	1.75196		1.66618		1.78753				2.23297		1.76531		1.79422		2.24633		1.81643
	1.75232		1.79129		2.25572				1.89729		1.98254		1.52591		1.91287		1.653
	2.07631		2.55679		2.37995				1.73352		0.557632		1.72856		2.42261		1.45678
	1.25842		2.00938		1.90887				1.40554		2.26329		1.6362		1.82516		2.03643
	2.24005		2.07824		1.8568				1.57619		1.48564		1.54797		1.61336		1.99954
	2.65393		2.53581		1.91746				1.76485		0.623271		1.5497		2.4378		2.32789
	2.68373		2.07574		2.12563								1.48242		2.17332		1.86687
