# Supplementary material for: Drosulfakinin signaling modulates female sexual receptivity in Drosophila
Source: eLife. 2022 Apr 27;11:e76025. doi: 10.7554/eLife.76025 (PMC9045819; doi:10.7554/eLife.76025)
Supplement: Figure 4—figure supplement 4—source data 1. [file elife-76025-fig4-figsupp4-data1.xlsx]

## Sheet: Sheet1
Figure 4-figure supplement 4C											Figure 4-figure supplement 4D
Genotpe	Copulation rate	StartTime	Genotpe	Copulation rate	StartTime	Genotpe	Copulation rate	StartTime			Genotpe	Copulation rate	StartTime	Genotpe	Copulation rate	StartTime	Genotpe	Copulation rate	StartTime
﹢/﹢;UAS-CCKLR-17D3 RNAi/dsxGAL4	0	00:01:01	dsxGAL4/﹢	0	00:06:37	﹢/﹢;UAS-CCKLR-17D3 RNAi/﹢	0	00:07:03			﹢/﹢;UAS-CCKLR-17D3/dsxGAL4	0	00:04:51	dsxGAL4/﹢	0	00:03:26	﹢/﹢;UAS-CCKLR-17D3/﹢	0	00:02:40
	0.02	00:02:24		0	00:09:59		0	00:04:45				0	00:03:26		0	00:03:00		0	00:20:20
	0.14	00:01:24		0.170455	00:02:30		0.0606061	00:08:23				0.05	1 day, 6:00:00		0.130952	1 day, 6:00:00		0.108434	00:05:52
	0.4	00:07:10		0.556818	00:02:18		0.171717	00:02:58				0.2	00:02:47		0.333333	00:05:36		0.289157	00:03:05
	0.64	00:02:30		0.727273	00:02:53		0.383838	00:04:50				0.366667	00:02:43		0.5	00:03:55		0.421687	00:02:24
	0.72	00:04:11		0.784091	00:05:55		0.59596	00:06:47				0.416667	00:02:49		0.571429	00:03:23		0.518072	00:03:08
	0.78	00:05:46		0.863636	00:03:05		0.707071	00:03:39				0.483333	1 day, 6:00:00		0.678571	00:01:10		0.566265	00:06:03
	0.84	00:03:10		0.920455	00:01:54		0.777778	00:15:53				0.5	00:07:04		0.72619	00:10:46		0.662651	00:06:58
	0.88	00:04:19		0.931818	00:02:39		0.828283	1 day, 6:00:00				0.583333	00:03:19		0.75	00:05:05		0.698795	1 day, 6:00:00
	0.88	00:06:28		0.943182	00:03:23		0.878788	00:04:40				0.633333	00:04:16		0.75	00:02:08		0.722892	1 day, 6:00:00
	0.9	00:03:04		0.954545	00:10:57		0.89899	00:06:06				0.65	00:02:31		0.761905	00:01:17		0.746988	00:02:26
	0.9	00:02:32		0.965909	00:11:41		0.909091	00:04:34				0.666667	1 day, 6:00:00		0.797619	00:01:06		0.759036	00:04:30
	0.9	00:09:02		0.977273	00:02:48		0.919192	00:01:35				0.683333	00:05:38		0.821429	00:03:43		0.771084	00:03:12
	0.9	00:02:34		0.977273	00:02:37		0.919192	00:03:07				0.683333	00:03:30		0.821429	00:02:23		0.771084	00:15:10
	0.9	00:02:15		0.977273	00:01:55		0.919192	00:03:20				0.683333	00:08:44		0.821429	00:03:02		0.783133	00:03:00
	0.9	00:04:25		0.977273	00:03:22		0.939394	00:03:24				0.7	00:10:55		0.821429	1 day, 6:00:00		0.795181	00:05:48
	0.92	00:02:10		0.977273	00:01:19		0.949495	00:08:53				0.716667	00:14:52		0.845238	00:03:18		0.819277	00:03:03
	0.92	00:15:56		0.977273	00:06:10		0.949495	00:01:46				0.716667	00:07:57		0.845238	00:11:59		0.819277	00:02:57
	0.92	00:02:14		0.977273	00:02:12		0.949495	00:04:28				0.716667	1 day, 6:00:00		0.845238	00:04:57		0.819277	00:06:25
	0.92	00:03:46		0.977273	00:08:08		0.949495	00:09:23				0.733333	00:02:00		0.845238	00:02:34		0.819277	1 day, 6:00:00
	0.92	00:01:53		0.977273	00:02:55		0.949495	00:04:35				0.733333	00:01:56		0.845238	00:02:27		0.819277	00:06:15
	0.92	00:05:07		0.977273	00:02:57		0.949495	00:03:06				0.733333	00:09:13		0.845238	00:15:05		0.831325	00:03:44
	0.92	00:06:00		0.977273	00:07:18		0.949495	00:04:25				0.733333	1 day, 6:00:00		0.845238	00:22:00		0.831325	00:03:47
	0.92	00:03:13		0.977273	00:05:53		0.949495	00:14:33				0.733333	00:08:49		0.857143	00:02:10		0.831325	00:06:03
	0.92	00:03:54		0.977273	00:02:23		0.949495	00:02:47				0.733333	00:03:57		0.869048	00:03:05		0.831325	00:06:26
	0.92	00:01:04		0.977273	00:03:41		0.949495	00:02:03				0.75	1 day, 6:00:00		0.869048	00:02:42		0.831325	00:08:33
	0.92	00:00:57		0.977273	1 day, 6:00:00		0.949495	00:04:53				0.75	00:03:45		0.869048	00:11:57		0.831325	00:03:05
	0.92	00:03:11		0.977273	00:03:06		0.949495	00:06:28				0.75	1 day, 6:00:00		0.880952	00:02:18		0.831325	00:04:04
	0.92	1 day, 6:00:00		0.977273	00:03:19		0.949495	00:03:14				0.75	00:06:20		0.880952	00:04:42		0.831325	00:01:20
	0.92	00:03:36		0.977273	00:01:38		0.949495	00:03:55				0.75	1 day, 6:00:00		0.880952	00:10:30		0.831325	00:01:40
	0.92	00:02:24		0.977273	00:01:37		0.949495	00:07:55				0.75	1 day, 6:00:00		0.880952	00:07:52		0.831325	00:04:43
		00:02:54			00:02:58			00:01:46					00:02:20			00:03:54			00:02:08
		00:03:25			00:01:50			00:05:21					00:02:45			1 day, 6:00:00			00:02:55
		00:01:25			00:03:29			00:05:37					1 day, 6:00:00			00:06:18			1 day, 6:00:00
		1 day, 6:00:00			00:02:00			00:03:29					1 day, 6:00:00			00:03:40			00:02:28
		00:05:07			00:01:30			00:02:25					00:01:44			00:01:56			00:02:16
		00:02:37			00:05:54			00:04:52					00:18:05			00:05:46			00:05:21
		1 day, 6:00:00			00:03:15			00:05:21					00:05:52			00:05:40			00:13:08
		00:06:36			00:02:09			1 day, 6:00:00					00:02:08			00:09:19			00:06:53
		1 day, 6:00:00			00:03:27			00:04:23					00:05:29			00:05:54			00:14:34
		00:03:53			00:04:03			00:03:12					1 day, 6:00:00			00:06:58			00:02:18
		00:03:27			00:01:42			00:03:34					00:07:39			00:03:09			00:03:30
		00:04:48			00:02:29			00:04:34					00:03:51			00:02:42			00:04:33
		00:07:52			00:02:45			00:02:53					00:01:29			00:04:46			00:09:26
		00:03:03			00:05:43			00:04:19					00:24:56			1 day, 6:00:00			00:02:04
		00:02:36			00:03:52			00:05:05					1 day, 6:00:00			00:23:12			00:01:38
		00:03:39			00:02:35			00:04:54					00:07:51			00:01:42			00:02:48
		00:02:22			00:02:57			00:08:36					00:03:23			00:02:00			00:03:09
		00:01:52			00:05:55			00:04:29					00:05:43			00:01:00			00:07:10
		00:02:16			00:02:03			00:05:19					00:11:35			00:04:23			00:03:45
					00:02:35			00:01:37					00:03:25			00:05:11			00:02:02
					00:03:56			00:04:19					00:15:07			00:01:23			1 day, 6:00:00
					00:02:28			00:03:37					00:03:20			00:02:50			00:02:16
					00:01:18			00:05:02					00:04:36			00:01:48			00:04:15
					00:06:03			00:06:06					00:08:04			1 day, 6:00:00			00:11:50
					00:03:16			00:05:07					00:07:08			00:05:20			00:04:00
					00:02:52			00:04:26					00:03:53			1 day, 6:00:00			00:07:30
					00:04:13			00:05:33					00:02:02			1 day, 6:00:00			00:01:26
					00:04:30			1 day, 6:00:00					1 day, 6:00:00			00:05:39			1 day, 6:00:00
					00:04:20			00:01:16					1 day, 6:00:00			00:03:16			00:05:00
					00:05:01			00:06:01								00:02:48			00:07:16
					00:06:04			00:02:46								00:06:05			1 day, 6:00:00
					00:02:28			00:08:10								00:05:39			1 day, 6:00:00
					00:02:22			00:03:57								00:03:16			1 day, 6:00:00
					00:04:14			00:03:09								00:06:18			00:03:55
					00:01:39			00:02:39								00:02:27			1 day, 6:00:00
					00:05:54			00:09:06								00:02:19			00:05:36
					00:02:12			00:05:29								1 day, 6:00:00			00:06:13
					00:01:26			00:04:32								00:10:36			1 day, 6:00:00
					00:01:17			00:03:07								00:02:04			00:01:39
					00:02:19			00:10:33								00:03:55			1 day, 6:00:00
					1 day, 6:00:00			00:04:11								00:02:19			00:02:59
					00:02:08			00:03:37								00:07:42			00:08:44
					00:03:02			00:03:51								00:04:15			00:01:52
					00:06:05			00:03:04								00:02:48			00:10:30
					00:02:00			00:08:46								00:03:05			00:01:25
					1 day, 6:00:00			00:02:48								00:04:42			00:01:31
					00:02:00			00:07:00								00:01:53			00:09:05
					00:01:27			00:05:34								1 day, 6:00:00			00:15:00
					00:03:37			00:03:36								00:01:34			1 day, 6:00:00
					00:01:40			00:04:36								00:15:14			00:01:30
					00:02:00			00:03:10								1 day, 6:00:00			1 day, 6:00:00
					00:02:15			00:07:48								00:26:19			00:04:45
					00:03:39			00:07:57								00:01:31
					00:02:19			00:03:34
					00:02:28			00:05:22
					1 day, 6:00:00			00:02:50
					00:01:55			00:01:57
								00:04:57
								00:03:12
								00:14:45
								00:06:11
								00:04:40
								00:11:04
								00:03:00
								00:02:54
								00:07:11
								1 day, 6:00:00
								1 day, 6:00:00
