# Supplementary material for: Drosulfakinin signaling modulates female sexual receptivity in Drosophila
Source: eLife. 2022 Apr 27;11:e76025. doi: 10.7554/eLife.76025 (PMC9045819; doi:10.7554/eLife.76025)
Supplement: Figure 4—source data 1. [file elife-76025-fig4-data1.xlsx]

## Sheet: Sheet1
									Figure 4D											Figure 4E							Figure 4F							Figure 4G								Figure 4H
Figure 4B
									Genotpe	Copulation rate	StartTime	Genotpe	Copulation rate	StartTime	Genotpe	Copulation rate	StartTime			Genotpe	Copulation rate	StartTime	Genotpe	Copulation rate	StartTime		Genotpe	Copulation rate	StartTime	Genotpe	Copulation rate	StartTime		Genotpe	Copulation rate	StartTime	Genotpe	Copulation rate	StartTime			Genotpe	Copulation rate	StartTime	Genotpe	Copulation rate	StartTime
									ΔCCKLR-17D3/ΔCCKLR-17D3	0	00:08:52	+/ΔCCKLR-17D3	0	00:03:03	﹢/﹢	0	00:02:58			ΔCCKLR-17D3/ΔCCKLR-17D3;UAS-CCKLR-17D3/﹢;elav-GS/﹢ RU486﹢	0	00:01:26	ΔCCKLR-17D3/ΔCCKLR-17D3;UAS-CCKLR-17D3/﹢;elav-GS/﹢ RU486﹣	0	00:04:33		ΔCCKLR-17D3/﹢;UAS-CCKLR-17D3/﹢﹢/﹢ RU486﹢	0	00:00:34	ΔCCKLR-17D3/﹢;UAS-CCKLR-17D3/﹢﹢/﹢ RU486﹣	0	00:05:41		ΔCCKLR-17D3/ΔCCKLR-17D3;﹢/﹢;elav-GS/elav-GS RU486﹢	0	00:03:06	ΔCCKLR-17D3/ΔCCKLR-17D3;﹢/﹢;elav-GS/elav-GS RU486﹣	0	00:01:49			CCKLR-17D3GAL4>UAS-dTrpA 29℃	0	00:02:26	CCKLR-17D3GAL4>UAS-dTrpA 21℃	0	00:06:58
										0	00:28:28		0.0111732	00:04:48		0.0397351	00:01:58				0.0697674	00:00:27		0.123967	00:01:46			0.0496454	00:30:00		0.0555556	00:02:21			0.136691	00:00:36		0.164286	00:01:25				0.0847458	00:03:49		0.0215054	00:06:50
										0.0285714	00:01:45		0.173184	00:04:35		0.198675	00:03:12				0.224806	00:06:15		0.504132	00:12:07			0.234043	00:05:25		0.243056	00:30:00			0.510791	00:01:47		0.435714	00:00:29				0.347458	00:01:03		0.129032	1 day, 6:00:00
										0.131429	00:30:00		0.324022	00:02:59		0.410596	00:04:48				0.364341	00:01:54		0.702479	00:30:00			0.411348	00:07:55		0.409722	00:05:32			0.676259	00:00:29		0.678571	00:00:32				0.59322	00:02:48		0.27957	00:03:03
										0.228571	00:07:47		0.530726	00:06:22		0.556291	00:05:40				0.48062	00:01:19		0.842975	00:30:00			0.510638	00:30:00		0.534722	00:08:15			0.776978	00:13:22		0.807143	00:01:01				0.711864	00:05:41		0.387097	00:04:14
										0.337143	00:11:49		0.715084	00:04:05		0.635762	00:03:23				0.550388	00:03:49		0.900826	00:10:49			0.617021	00:20:24		0.631944	00:03:20			0.841727	00:05:02		0.857143	00:00:45				0.79661	00:02:49		0.473118	00:08:15
										0.411429	00:03:48		0.804469	00:03:52		0.728477	00:02:27				0.620155	00:04:25		0.917355	00:03:35			0.673759	00:03:00		0.680556	00:04:36			0.884892	00:00:53		0.885714	00:30:00				0.881356	00:01:09		0.548387	00:05:34
										0.485714	00:10:35		0.865922	00:02:43		0.788079	00:01:28				0.651163	00:00:55		0.942149	00:05:41			0.70922	00:30:00		0.729167	00:01:08			0.906475	00:00:37		0.907143	00:00:57				0.90678	00:01:43		0.623656	00:08:15
										0.56	00:09:05		0.871508	00:03:46		0.81457	00:03:39				0.697674	00:02:10		0.942149	00:07:47			0.730496	00:03:31		0.736111	00:01:54			0.906475	00:01:50		0.907143	00:01:10				0.915254	00:02:29		0.666667	00:11:17
										0.622857	00:27:23		0.882682	00:02:07		0.834437	00:30:00				0.72093	00:00:44		0.942149	00:07:56			0.751773	00:30:00		0.75	00:01:16			0.913669	00:01:35		0.907143	00:01:22				0.932203	00:01:37		0.731183	1 day, 6:00:00
										0.662857	00:04:26		0.893855	00:01:59		0.847682	00:05:22				0.736434	00:10:42		0.950413	00:11:37			0.780142	00:04:17		0.770833	00:03:15			0.920863	00:12:15		0.907143	00:01:45				0.949153	00:01:38		0.741935	00:09:37
										0.714286	00:17:52		0.899441	00:04:29		0.860927	00:01:00				0.751938	00:01:29		0.983471	00:11:17			0.787234	00:04:56		0.784722	00:02:08			0.920863	00:02:39		0.907143	00:02:46				0.966102	00:02:22		0.795699	1 day, 6:00:00
										0.754286	00:20:44		0.910615	00:03:15		0.86755	00:30:00				0.782946	00:03:12		0.983471	00:02:30			0.808511	00:01:07		0.791667	00:02:29			0.920863	00:03:00		0.907143	00:30:00				0.966102	00:08:15		0.817204	00:02:18
										0.771429	00:10:17		0.916201	00:03:18		0.874172	00:04:25				0.790698	00:01:37		0.983471	00:01:08			0.822695	00:01:50		0.805556	00:03:32			0.928058	00:02:29		0.907143	00:03:32				0.966102	00:01:28		0.817204	00:05:35
										0.805714	00:10:24		0.921788	00:02:40		0.880795	00:01:26				0.79845	00:01:37		0.983471	00:02:02			0.822695	00:06:50		0.826389	00:01:04			0.942446	00:01:12		0.907143	00:03:54				0.966102	00:01:47		0.83871	00:04:04
										0.822857	00:07:57		0.927374	00:05:57		0.887417	00:03:03				0.813953	00:01:17		0.983471	00:14:16			0.822695	00:01:45		0.826389	00:01:19			0.942446	00:04:55		0.914286	00:30:00				0.966102	00:04:32		0.83871	1 day, 6:00:00
										0.851429	00:03:42		0.927374	00:04:21		0.887417	00:02:36				0.813953	00:03:03		0.983471	00:07:52			0.822695	00:01:55		0.840278	00:13:58			0.94964	00:06:33		0.914286	00:04:48				0.966102	00:01:01		0.870968	1 day, 6:00:00
										0.857143	00:14:26		0.927374	00:01:26		0.887417	00:01:42				0.813953	00:02:04		0.983471	00:03:09			0.822695	00:01:07		0.847222	00:02:09			0.94964	00:00:25		0.914286	00:30:00				0.966102	00:03:10		0.870968	00:05:35
										0.862857	00:04:22		0.927374	00:03:47		0.887417	00:01:52				0.829457	00:03:29		0.983471	00:05:42			0.822695	00:05:23		0.854167	00:03:56			0.94964	00:30:00		0.914286	00:01:14				0.966102	00:01:39		0.870968	00:15:28
										0.868571	00:02:55		0.927374	00:30:00		0.887417	00:03:28				0.837209	00:01:37		0.983471	00:08:06			0.836879	00:02:06		0.854167	00:03:02			0.94964	00:00:17		0.914286	00:30:00				0.966102	00:02:13		0.870968	00:10:24
										0.885714	00:20:04		0.927374	00:30:00		0.887417	00:07:33				0.837209	00:03:52		0.983471	00:04:00			0.836879	00:03:25		0.861111	00:01:52			0.94964	00:06:31		0.914286	00:01:15				0.966102	00:00:29		0.870968	00:05:42
										0.902857	00:30:00		0.927374	00:01:09		0.887417	00:02:54				0.844961	00:02:33		0.991736	00:04:44			0.843972	00:01:44		0.868056	00:08:17			0.94964	00:01:05		0.914286	00:01:00				0.966102	00:03:58		0.870968	00:06:18
										0.908571	00:10:16		0.927374	00:30:00		0.887417	00:01:58				0.844961	00:10:37		0.991736	00:05:35			0.843972	00:03:32		0.868056	00:03:55			0.94964	00:01:49		0.914286	00:03:11				0.966102	00:02:23		0.870968	1 day, 6:00:00
Figure 4C										0.908571	00:06:35		0.927374	00:04:13		0.887417	00:07:25				0.844961	00:30:00		0.991736	00:01:09			0.851064	00:05:40		0.868056	00:02:04			0.94964	00:01:04		0.914286	00:01:02				0.966102	00:10:35		0.870968	00:06:44
										0.925714	00:18:29		0.932961	00:04:01		0.887417	00:02:25				0.852713	00:01:36		0.991736	00:02:14			0.858156	00:01:01		0.875	00:03:32			0.94964	00:02:23		0.914286	00:04:55				0.966102	00:02:35		0.870968	00:15:44
										0.931429	00:01:47		0.938547	00:03:45		0.887417	00:02:05				0.852713	00:06:46		0.991736	00:30:00			0.858156	00:02:01		0.875	00:02:07			0.94964	00:03:51		0.914286	00:03:06				0.966102	00:02:45		0.870968	00:27:50
										0.931429	00:04:01		0.938547	00:01:47		0.887417	00:12:20				0.852713	00:01:07		0.991736	00:07:42			0.858156	00:02:03		0.875	00:09:18			0.94964	00:01:09		0.914286	00:03:15				0.966102	00:03:57		0.870968	00:02:07
										0.942857	00:10:31		0.938547	00:03:32		0.900662	00:03:09				0.860465	00:01:22		0.991736	00:17:58			0.858156	00:01:08		0.875	00:03:43			0.94964	00:02:06		0.914286	00:05:11				0.966102	00:01:00		0.870968	00:07:41
										0.954286	00:09:37		0.938547	00:14:54		0.900662	00:06:02				0.860465	00:01:43		0.991736	00:02:03			0.858156	00:01:03		0.881944	00:10:38			0.94964	00:30:00		0.914286	00:03:18				0.966102	00:01:01		0.88172	00:10:01
										0.96	00:11:34		0.938547	00:01:21		0.900662	00:11:18				0.860465	00:01:41		0.991736	00:04:48			0.858156	00:02:13		0.881944	00:04:51			0.94964	00:00:39		0.914286	00:01:29				0.966102	00:03:02		0.88172	00:04:18
										0.96	00:12:56		0.938547	00:02:06		0.913907	00:01:24				0.860465	00:03:02		0.991736	00:30:00			0.858156	00:02:29		0.888889	00:01:37			0.94964	00:13:40		0.914286	00:01:22				0.966102	00:00:45		0.88172	00:02:22
											00:15:36			00:03:47			00:02:02					00:01:31			00:20:06				00:00:56			00:06:16				00:01:30			00:30:00					00:03:25			00:00:16
											00:09:02			00:03:26			00:05:35					00:01:32			00:08:32				00:04:04			00:02:03				00:03:05			00:02:25					00:01:18			00:01:08
											00:03:56			00:02:28			00:05:24					00:01:46			00:07:11				00:18:27			00:02:30				00:01:21			00:02:51					00:01:54			00:02:25
											00:06:29			00:04:09			00:01:33					00:01:04			00:30:00				00:01:33			00:01:07				00:01:11			00:01:22					00:09:48			00:03:37
											00:08:49			00:04:40			00:02:01					00:02:26			00:11:14				00:30:00			00:06:48				00:00:32			00:03:25					00:01:08			00:03:30
											00:09:30			00:11:49			00:01:08					00:00:41			00:18:39				00:05:13			00:30:00				00:01:01			00:05:06					00:05:49			00:02:42
											00:04:18			00:06:23			00:08:47					00:01:24			00:01:11				00:00:51			00:16:31				00:01:27			00:02:28					00:01:15			00:03:24
											00:13:40			00:04:20			00:03:45					00:02:51			00:01:04				00:30:00			00:01:40				00:05:00			00:01:32					00:00:38			00:13:11
											00:30:00			00:04:18			00:02:47					00:04:17			00:00:39				00:02:00			00:00:47				00:01:19			00:00:36					00:02:01			00:01:29
											00:02:50			00:01:50			00:03:31					00:01:06			00:01:29				00:01:28			00:13:01				00:05:18			00:02:11					00:01:51			00:02:06
											00:06:07			00:30:00			00:03:28					00:02:50			00:02:08				00:05:09			00:30:00				00:02:13			00:02:42					00:00:57			00:03:52
											00:30:00			00:05:22			00:04:38					00:03:51			00:03:40				00:04:35			00:05:46				00:00:55			00:00:27					00:03:47			00:14:00
											00:04:21			00:02:52			00:04:47					00:01:31			00:02:22				00:00:54			00:05:28				00:02:02			00:05:00					00:02:06			00:06:48
											00:08:00			00:02:10			00:05:08					00:00:32			00:01:55				00:02:37			00:03:06				00:04:01			00:04:24					00:02:44			00:01:01
											00:05:37			00:01:23			00:02:53					00:00:44			00:05:21				00:02:23			00:02:51				00:01:58			00:00:33					00:02:00			00:05:05
											00:05:23			00:04:30			00:05:56					00:02:30			00:30:00				00:01:01			00:12:39				00:01:24			00:01:42					00:10:20			1 day, 6:00:00
											00:23:15			00:01:24			00:02:23					00:03:26			00:04:16				00:01:42			00:30:00				00:01:34			00:01:13					00:07:52			1 day, 6:00:00
											00:04:56			00:07:03			00:14:31					00:00:42			00:30:00				00:01:38			00:03:02				00:04:25			00:30:00					00:01:58			00:01:48
											00:04:30			00:02:38			00:30:00					00:01:21			00:01:14				00:30:00			00:13:42				00:03:16			00:02:06					00:02:35			00:04:13
											00:02:30			00:04:00			00:01:54					00:02:38			00:01:22				00:04:33			00:02:31				00:04:17			00:01:52					00:05:15			00:11:00
											00:27:14			00:03:03			00:03:14					00:00:39			00:01:04				00:01:52			00:06:56				00:05:17			00:04:48					00:03:32			00:03:42
											00:07:41			00:01:58			00:04:18					00:01:50			00:04:51				00:01:43			00:09:54				00:08:47			00:06:17					00:05:06			1 day, 6:00:00
											00:04:39			00:03:32			00:05:37					00:01:33			00:03:09				00:02:36			00:01:57				00:02:43			00:03:33					00:05:20			00:00:50
											00:23:13			00:03:10			00:01:35					00:01:35			00:30:00				00:09:06			00:02:35				00:02:21			00:04:25					00:05:30			00:07:58
											00:04:47			00:03:23			00:04:38					00:01:50			00:01:52				00:02:15			00:01:04				00:04:41			00:00:59					00:05:26			00:15:20
											00:05:00			00:05:22			00:30:00					00:00:35			00:01:44				00:22:55			00:02:04				00:03:29			00:01:26					00:02:14			00:10:48
											00:07:27			00:03:52			00:30:00					00:01:24			00:01:08				00:04:16			00:30:00				00:02:20			00:03:13					00:02:03			1 day, 6:00:00
											00:05:34			00:23:08			00:02:07					00:01:15			00:02:04				00:23:39			00:04:22				00:01:46			00:01:52					1 day, 6:00:00			00:02:52
											00:10:54			00:03:00			00:02:02					00:02:37			00:30:00				00:01:20			00:02:09				00:01:29			00:02:47					00:02:26			00:03:27
											00:21:22			00:05:30			00:05:16					00:02:01			00:01:49				00:02:17			00:02:31				00:00:45			00:01:46					00:04:07			00:05:10
											00:11:32			00:01:41			00:08:32					00:01:30			00:01:52				00:02:08			00:01:15				00:00:49			00:03:21					00:03:24			00:08:12
											00:19:47			00:04:29			00:01:34					00:02:14			00:07:54				00:00:44			00:04:08				00:01:14			00:01:14					00:00:50			00:08:58
											00:15:04			00:12:27			00:05:16					00:01:07			00:02:08				00:03:01			00:01:08				00:01:34			00:02:25					00:06:40			00:02:13
											00:06:26			00:30:00			00:01:46					00:03:54			00:03:44				00:04:37			00:01:08				00:01:36			00:02:45					00:02:03			00:02:29
											00:07:15			00:02:29			00:00:48					00:01:17			00:00:37				00:02:58			00:02:57				00:01:30			00:03:43					00:03:00			00:02:05
											00:04:28			00:02:45			00:02:00					00:02:25			00:02:00				00:01:20			00:04:12				00:30:00			00:03:14					00:01:56			00:01:47
											00:11:20			00:03:09			00:02:07					00:03:42			00:03:09				00:10:22			00:02:40				00:02:06			00:02:20					00:03:33			00:04:49
											00:09:22			00:05:48			00:03:03					00:00:39			00:00:40				00:02:36			00:16:00				00:01:16			00:02:16					00:04:00			1 day, 6:00:00
											00:02:26			00:02:22			00:30:00					00:01:30			00:04:27				00:06:27			00:01:53				00:03:41			00:05:33					1 day, 6:00:00			00:05:23
											00:06:37			00:06:32			00:01:43					00:05:50			00:30:00				00:12:08			00:07:19				00:01:17			00:02:46					00:01:17			00:10:06
											00:16:46			00:04:21			00:02:32					00:02:22			00:09:51				00:09:43			00:30:00				00:01:50			00:01:52					00:01:28			00:08:50
											00:04:40			00:03:53			00:03:26					00:02:01			00:09:29				00:06:52			00:01:47				00:03:05			00:02:38					00:03:14			00:01:11
											00:05:29			00:10:10			00:02:00					00:01:46			00:03:03				00:07:00			00:00:34				00:03:08			00:00:54					00:01:17			00:06:55
											00:08:10			00:04:22			00:06:27					00:03:22			00:08:16				00:30:00			00:03:29				00:02:07			00:00:46					00:00:24			00:02:58
											00:19:47			00:03:28			00:03:02					00:10:08			00:30:00				00:30:00			00:09:01				00:01:45			00:30:00					00:01:47			00:01:25
											00:06:20			00:05:00			00:03:11					00:04:26			00:06:53				00:30:00			00:04:20				00:03:38			00:02:10					00:03:26			00:03:40
											00:07:34			00:30:00			00:03:11					00:00:32			00:03:49				00:07:02			00:19:19				00:01:13			00:02:20					00:01:38			00:02:58
											00:08:44			00:01:47			00:26:33					00:04:26			00:02:44				00:03:33			00:05:07				00:16:00			00:02:03					00:02:27			00:01:44
											00:05:57			00:01:33			00:01:20					00:02:27			00:00:54				00:11:49			00:01:50				00:01:44			00:01:29					00:00:35			00:07:42
											00:06:16			00:04:18			00:06:17					00:01:25			00:03:06				00:30:00			00:01:28				00:00:20			00:01:00					00:01:32			00:01:18
											00:15:37			00:03:12			00:03:13					00:00:42			00:06:58				00:01:14			00:30:00				00:01:19			00:30:00					00:02:19			00:02:08
											00:04:15			00:01:19			00:06:21					00:00:25			00:05:49				00:30:00			00:30:00				00:01:44			00:30:00					00:01:00			00:02:50
											00:09:08			00:02:04			00:30:00					00:01:44			00:03:25				00:06:39			00:06:33				00:30:00			00:02:03					00:03:02			00:11:37
											00:14:39			00:04:24			00:04:14					00:02:04			00:30:00				00:04:10			00:01:26				00:05:12			00:02:06					00:02:25			00:03:38
											00:05:02			00:04:26			00:00:58					00:06:00			00:02:52				00:01:49			00:05:34				00:00:57			00:00:43					00:01:27			00:06:25
											00:07:07			00:03:14			00:01:41					00:02:24			00:00:44				00:09:44			00:12:11				00:30:00			00:02:23					00:08:04			00:08:24
											00:13:33			00:04:43			00:30:00					00:01:34			00:01:05				00:03:48			00:02:00				00:01:59			00:00:48					00:04:49			00:07:48
											00:24:19			00:01:45			00:05:40					00:05:04			00:05:06				00:03:28			00:23:45				00:05:03			00:00:26					00:02:18			00:04:51
											00:15:15			00:02:23			00:30:00					00:02:04			00:03:07				00:08:25			00:02:18				00:04:16			00:02:12					00:05:00			00:01:30
											00:26:25			00:01:56			00:02:13					00:01:40			00:17:02				00:03:58			00:01:49				00:05:02			00:06:35					00:05:07			00:03:30
											00:26:25			00:30:00			00:02:25					00:04:00			00:06:00				00:01:29			00:06:05				00:02:02			00:04:40					00:04:20			00:04:37
											00:04:13			00:03:59			00:06:15					00:04:08			00:03:04				00:07:52			00:03:29				00:01:05			00:01:51					00:00:56			00:04:25
											00:03:53			00:01:53			00:03:02					00:01:12			00:01:09				00:04:14			00:02:51				00:04:04			00:00:37					00:01:08
											00:02:36			00:08:36			00:00:59					00:01:22			00:05:08				00:03:58			00:05:25				00:00:49			00:01:18					00:04:54
											00:05:28			00:04:10			00:02:35					00:09:13			00:00:45				00:03:21			00:01:55				00:02:00			00:00:46					1 day, 6:00:00
											00:07:16			00:01:43			00:01:36					00:00:38			00:05:22				00:00:53			00:03:56				00:09:00			00:01:25					00:01:46
											00:12:25			00:01:30			00:02:22					00:04:41			00:30:00				00:30:00			00:06:49				00:00:52			00:00:44					00:02:02
											00:06:23			00:05:20			00:01:37					00:01:43			00:02:48				00:01:10			00:02:17				00:01:20			00:01:00					00:01:35
											00:13:13			00:05:54			00:02:16					00:01:06			00:26:19				00:18:50			00:30:00				00:00:54			00:01:09					00:01:46
											00:23:39			00:03:32			00:30:00					00:03:51			00:03:15				00:04:42			00:00:51				00:01:47			00:02:49					00:02:05
											00:07:00			00:03:23			00:04:02					00:02:02			00:06:00				00:02:57			00:30:00				00:02:27			00:01:26					00:01:35
											00:13:26			00:08:56			00:01:28					00:02:04			00:01:53				00:02:39			00:01:24				00:01:10			00:02:20					00:00:38
											00:19:40			00:05:42			00:30:00					00:01:45			00:05:54				00:02:00			00:04:39				00:00:38			00:03:52					00:09:22
											00:03:47			00:30:00			00:08:02					00:02:44			00:04:19				00:02:57			00:01:13				00:06:03			00:02:06					00:02:37
											00:07:37			00:03:27			00:30:00					00:01:37			00:30:00				00:30:00			00:27:34				00:02:06			00:03:35					00:02:28
											00:03:23			00:01:45			00:03:53					00:02:05			00:03:17				00:02:15			00:04:36				00:01:35			00:02:40					00:04:13
											00:05:47			00:05:15			00:01:19					00:01:12			00:13:25				00:30:00			00:15:02				00:02:12			00:02:17					1 day, 6:00:00
											00:13:13			00:03:49			00:04:03					00:20:40			00:30:00				00:03:21			00:20:26				00:02:49			00:02:36					00:05:28
											00:08:01			00:04:18			00:02:27					00:02:08			00:14:27				00:01:23			00:17:34				00:01:02			00:02:41					00:02:02
											00:07:46			00:01:27			00:05:12					00:01:08			00:23:15				00:11:23			00:30:00				00:00:38			00:02:40					00:01:10
											00:01:32			00:01:55			00:05:27					00:02:16			00:30:00				00:01:46			00:03:45				00:01:01			00:30:00					00:03:12
											00:02:07			00:05:48			00:02:54					00:10:05			00:10:19				00:04:08			00:00:50				00:01:58			00:03:50					00:05:00
											00:08:35			00:09:05			00:02:18					00:03:21			00:01:20				00:03:22			00:01:33				00:02:28			00:01:36					00:06:50
											00:11:00			00:06:27			00:06:37					00:01:38			00:30:00				00:03:24			00:30:00				00:01:04			00:03:04					00:02:09
											00:05:48			00:05:25			00:03:09					00:03:40			00:30:00				00:01:29			00:30:00				00:01:05			00:02:25					00:06:02
											00:08:41			00:03:53			00:07:26					00:03:27			00:11:23				00:30:00			00:30:00				00:30:00			00:03:15					00:05:11
											00:04:54			00:06:26			00:02:08					00:03:55			00:02:03				00:12:24			00:02:22				00:02:38			00:00:50					00:04:28
											00:10:20			00:01:17			00:02:27					00:03:19			00:02:57				00:08:02			00:30:00				00:03:17			00:01:26
											00:02:43			00:00:58			00:02:37					00:00:49			00:01:35				00:05:02			00:30:00				00:02:17			00:01:27
											00:05:49			00:02:56			00:07:25					00:01:04			00:03:10				00:09:35			00:01:50				00:01:08			00:01:16
											00:02:39			00:04:49			00:05:00								00:00:43				00:05:25			00:06:44				00:01:38			00:02:44
											00:06:24			00:03:30			00:10:04								00:02:27				00:30:00			00:03:46				03:36:00			00:00:26
											00:07:51			00:03:48			00:03:46								00:04:20				00:30:00			00:04:05				00:01:45			00:01:17
											00:02:41			00:03:41			00:06:16								00:02:12				00:02:04			00:04:44				00:01:17			00:01:16
											00:15:35			00:01:33			00:02:17								00:02:33				00:02:39			00:30:00				00:02:03			00:01:56
											00:08:29			00:04:27			00:13:19								00:00:51				00:02:14			00:11:32				00:01:02			00:01:12
											00:30:00			00:01:43			00:05:44								00:02:00				00:30:00			00:04:44				00:03:45			00:14:46
											00:02:39			00:24:43			00:01:12								00:00:42				00:00:46			00:01:46				00:01:50			00:06:27
											00:02:50			00:05:44			00:30:00												00:02:04			00:03:01				00:01:40			00:01:02
											00:09:00			00:06:07			00:02:07												00:04:09			00:04:47				00:01:28			00:03:27
											00:02:34			00:01:18			00:30:00												00:11:49			00:00:57				00:03:20			00:01:35
											00:05:05			00:02:54			00:05:40												00:30:00			00:01:16				00:00:47			00:02:06
											00:14:40			00:05:09			00:01:33												00:04:56			00:03:00				00:01:09			00:00:55
											00:12:56			00:03:00			00:06:42												00:04:30			00:02:53				00:04:00			00:30:00
											00:11:29			00:02:02			00:03:50												00:01:08			00:03:55				00:03:30			00:02:41
											00:03:32			00:04:34			00:26:32												00:04:46			00:02:34				00:02:38			00:02:35
											00:13:18			00:03:10			00:30:00												00:02:44			00:10:24				00:01:31			00:00:53
											00:08:55			00:09:45			00:10:52												00:03:26			00:00:38				00:03:13			00:05:09
											00:08:24			00:04:43			00:09:16												00:05:21			00:00:40							00:01:34
											00:10:42			00:13:53			00:06:39												00:08:46			00:01:00
											00:07:20			00:01:19			00:04:20															00:03:04
											00:01:29			00:05:22			00:01:00															00:04:08
											00:01:10			00:06:33			00:03:35															00:04:38
											00:06:07			00:05:26			00:00:49
											00:20:53			00:06:33			00:04:20
											00:05:08			00:01:43			00:01:30
											00:03:56			00:03:03			00:02:16
											00:03:36			00:06:01			00:01:50
											00:30:00			00:30:00			00:09:01
											00:06:48			00:03:47			00:02:30
											00:10:56			00:02:27
											00:04:09			00:03:14
											00:04:43			00:02:00
											00:08:45			00:02:50
											00:02:48			00:02:22
											00:02:52			00:03:53
											00:04:51			00:04:33
											00:30:00			00:04:53
											00:03:53			00:04:56
											00:03:41			00:04:31
											00:03:30			00:00:57
											00:02:56			00:04:00
											00:03:47			00:03:33
											00:04:13			00:04:31
											00:05:15			00:02:59
											00:03:24			00:03:35
											00:02:44			00:11:19
											00:03:32			00:01:44
											00:06:43			00:30:00
											00:11:18			00:03:36
											00:02:23			00:02:15
											00:03:24			00:06:58
											00:03:28			00:02:14
											00:02:33			00:30:00
														00:05:11
														00:02:53
														00:01:41
														00:06:34
[truncated: 33 more columns]
