# Supplementary material for: Drosulfakinin signaling modulates female sexual receptivity in Drosophila
Source: eLife. 2022 Apr 27;11:e76025. doi: 10.7554/eLife.76025 (PMC9045819; doi:10.7554/eLife.76025)
Supplement: Figure 5—figure supplement 1—source data 1. [file elife-76025-fig5-figsupp1-data1.xlsx]

## Sheet: Sheet1
Figure 5-figure supplement 1A							Figure 5-figure supplement 1B
Genotpe	Copulation rate	StartTime	Genotpe	Copulation rate	StartTime		Genotpe	Copulation rate	StartTime	Genotpe	Copulation rate	StartTime
R71G01-GAL4/UAS-dTrpA 29 °C	0	00:03:31	R71G01-GAL4/UAS-dTrpA 21 °C	0	00:25:53		R71G01-GAL4/﹢ 29 °C	0	00:00:39	R71G01-GAL4/﹢ 21 °C	0	00:01:30
	0.0656934	00:01:19		0.00763359	00:08:41			0.0833333	00:01:40		0.0841121	00:02:19
	0.255474	00:00:45		0.0763359	00:06:43			0.458333	00:01:04		0.401869	00:01:42
	0.540146	00:02:48		0.282443	00:02:30			0.641667	00:01:05		0.616822	00:06:26
	0.671533	00:01:18		0.358779	00:05:55			0.775	00:01:49		0.775701	00:03:27
	0.80292	00:03:44		0.480916	00:11:38			0.833333	00:02:22		0.869159	00:03:24
	0.861314	00:03:12		0.603053	00:08:08			0.891667	00:01:40		0.897196	00:03:21
	0.890511	00:03:41		0.648855	00:07:09			0.908333	00:02:20		0.934579	00:01:25
	0.927007	00:04:51		0.709924	00:03:31			0.925	00:12:11		0.962617	00:04:15
	0.934307	00:00:36		0.748092	00:09:28			0.933333	00:05:07		0.962617	00:03:36
	0.934307	00:03:40		0.78626	00:04:58			0.95	00:02:29		0.971963	00:05:08
	0.934307	00:02:23		0.80916	00:30:00			0.95	00:01:32		0.971963	00:03:58
	0.948905	00:01:49		0.832061	00:02:50			0.958333	00:01:59		0.971963	00:02:06
	0.948905	00:02:23		0.839695	00:07:22			0.966667	00:03:09		0.971963	00:04:30
	0.948905	00:01:39		0.854962	00:02:57			0.966667	00:09:36		0.971963	00:04:41
	0.948905	00:01:58		0.854962	00:09:15			0.966667	00:02:26		0.971963	00:02:52
	0.948905	00:01:45		0.870229	00:02:04			0.966667	00:02:43		0.971963	00:07:58
	0.948905	00:03:24		0.877863	00:05:08			0.966667	00:11:22		0.971963	00:01:13
	0.948905	00:03:10		0.877863	00:20:08			0.966667	00:30:00		0.971963	00:00:53
	0.948905	00:00:50		0.877863	00:05:00			0.966667	00:01:13		0.971963	00:01:13
	0.948905	00:03:07		0.885496	00:24:33			0.966667	00:02:43		0.971963	00:01:50
	0.948905	00:00:56		0.89313	00:05:53			0.966667	00:02:17		0.971963	00:07:36
	0.948905	00:03:11		0.900763	00:04:13			0.966667	00:01:43		0.971963	00:03:52
	0.948905	00:01:25		0.900763	00:11:40			0.975	00:02:02		0.971963	00:01:03
	0.948905	00:02:25		0.900763	00:02:44			0.975	00:01:06		0.971963	00:00:29
	0.948905	00:04:02		0.908397	00:07:25			0.975	00:01:05		0.971963	00:03:54
	0.948905	00:03:47		0.916031	00:04:49			0.975	00:02:46		0.971963	00:01:56
	0.948905	00:01:35		0.916031	00:07:47			0.975	00:01:02		0.971963	00:00:51
	0.948905	00:02:08		0.916031	00:02:43			0.975	00:03:10		0.971963	00:02:11
	0.948905	00:02:53		0.916031	00:05:44			0.975	00:02:18		0.971963	00:01:37
	0.948905	00:02:42		0.916031	00:02:55			0.975	00:01:00		0.971963	00:00:51
		00:01:50			00:01:47				00:05:47			00:02:36
		00:02:25			00:04:01				00:03:18			00:03:45
		00:01:18			00:13:27				00:06:11			00:02:38
		00:01:12			00:07:58				00:02:57			00:30:00
		00:04:31			00:13:50				00:01:20			00:00:58
		00:02:18			00:09:22				00:01:04			00:01:38
		00:02:08			00:09:22				00:01:27			00:03:53
		00:03:25			00:30:00				00:03:04			00:07:34
		00:03:08			00:02:54				00:04:50			00:00:36
		00:02:51			00:04:27				00:03:48			00:02:31
		00:02:23			00:15:06				00:04:17			00:06:43
		00:02:00			00:10:21				00:01:54			00:02:58
		00:04:54			00:03:28				00:01:55			00:04:04
		00:02:00			00:03:24				00:01:01			00:02:10
		00:02:43			00:04:10				00:01:33			00:01:05
		00:02:45			00:11:27				00:01:47			00:02:15
		00:04:43			00:05:38				00:00:53			00:01:11
		00:01:13			00:16:19				00:01:48			00:02:08
		00:11:31			00:10:53				00:05:38			00:03:55
		00:01:24			00:02:54				00:01:10			00:04:08
		00:02:11			00:04:19				00:07:31			00:01:50
		00:02:05			00:04:15				00:03:44			00:09:40
		00:01:44			00:02:30				00:06:05			00:05:09
		00:00:55			00:30:00				00:02:55			00:01:47
		00:02:59			00:05:24				00:01:24			00:04:52
		00:03:22			00:01:34				00:05:12			00:03:28
		00:06:38			00:05:05				00:01:31			00:01:10
		00:02:19			00:09:54				00:01:20			00:01:45
		00:05:05			00:02:13				00:03:38			00:01:37
		00:02:13			00:07:42				00:00:33			00:01:35
		00:02:48			00:04:02				00:05:04			00:05:59
		00:00:49			00:01:29				00:00:55			00:30:00
		00:00:30			00:02:53				00:05:42			00:01:19
		00:01:52			00:05:22				00:03:25			00:01:59
		00:02:03			00:19:58				00:01:19			00:01:02
		00:03:48			00:15:16				00:00:56			00:03:06
		00:01:33			00:21:40				00:08:24			00:00:42
		00:02:33			00:30:00				00:02:38			00:06:24
		00:01:56			00:08:31				00:03:53			00:02:23
		00:02:07			00:08:50				00:03:48			00:01:44
		00:02:00			00:02:50				00:01:02			00:03:56
		00:01:24			00:04:08				00:05:00			00:01:17
		00:02:23			00:01:27				00:01:52			00:01:12
		00:04:43			00:03:46				00:09:17			00:01:02
		00:04:45			00:03:25				00:03:11			00:01:21
		00:01:00			00:30:00				00:03:48			00:01:56
		00:05:15			00:02:42				00:01:00			00:02:01
		00:01:53			00:02:56				00:00:56			00:03:19
		00:02:57			00:04:25				00:01:06			00:02:11
		00:03:33			00:30:00				00:02:33			00:02:02
		00:04:17			00:30:00				00:04:57			00:04:43
		00:06:37			00:30:00				00:01:59			00:02:55
		00:03:29			00:06:20				00:02:51			00:02:47
		00:04:56			00:12:37				00:30:00			00:02:12
		00:02:14			00:05:53				00:01:29			00:01:22
		00:02:44			00:00:50				00:03:56			00:01:33
		00:01:36			00:04:27				00:03:05			00:02:34
		00:04:10			00:01:56				00:01:03			00:02:36
		00:03:00			00:03:28				00:00:46			00:30:00
		00:02:03			00:02:50				00:01:47			00:01:44
		00:04:08			00:08:48				00:01:36			00:03:17
		00:06:18			00:01:31				00:05:40			00:00:37
		00:02:20			00:02:08				00:02:01			00:01:26
		00:30:00			00:01:25				00:02:05			00:01:00
		00:01:35			00:05:03				00:04:18			00:01:57
		00:04:22			00:10:46				00:01:36			00:03:14
		00:04:12			00:30:00				00:03:58			00:02:31
		00:00:53			00:02:58				00:02:13			00:02:17
		00:03:11			00:07:53				00:04:48			00:01:57
		00:02:48			00:03:05				00:02:57			00:02:11
		00:04:30			00:05:33				00:03:06			00:06:54
		00:02:37			00:05:54				00:02:38			00:04:01
		00:01:08			00:06:40				00:07:05			00:04:17
		00:05:07			00:03:41				00:01:16			00:01:05
		00:07:55			00:05:21				00:04:46			00:03:20
		00:03:45			00:03:28				00:01:27			00:04:21
		00:02:55			00:06:49				00:02:53
		00:01:14			00:03:01				00:01:48
		00:11:21			00:02:58				00:22:31
		00:04:32			00:05:39				00:02:12
		00:04:31			00:04:06				00:01:28
		00:02:49			00:04:43				00:01:26
		00:01:35			00:30:00				00:01:54
		00:04:40			00:06:15				00:01:02
		00:07:59			00:05:48				00:01:29
		00:07:51			00:30:00				00:30:00
		00:06:38			00:02:56				00:01:00
		00:07:29			00:06:57				00:01:27
		00:02:21			00:05:14				00:01:53
		00:02:03			00:02:44
		00:01:54			00:01:44
		00:01:47			00:02:47
		00:04:03			00:02:36
		00:07:11			00:07:54
		00:08:37			00:02:25
		00:05:13			00:04:00
		00:05:23			00:02:16
		00:05:48			00:02:41
		00:05:55			00:02:08
		00:05:17			00:01:24
		00:30:00
		00:30:00
		00:30:00
		00:30:00
		00:30:00
		00:30:00
