# Supplementary material for: Drosulfakinin signaling modulates female sexual receptivity in Drosophila
Source: eLife. 2022 Apr 27;11:e76025. doi: 10.7554/eLife.76025 (PMC9045819; doi:10.7554/eLife.76025)
Supplement: Figure 5—source data 1. [file elife-76025-fig5-data1.xlsx]

## Sheet: Sheet1
Figure 5D							Figure 5E							Figure5F							Figure 5G
Genotpe	Copulation rate	StartTime	Genotpe	Copulation rate	StartTime		Genotpe	Copulation rate	StartTime	Genotpe	Copulation rate	StartTime		Genotpe	Copulation rate	StartTime	Genotpe	Copulation rate	StartTime		Genotpe	Copulation rate	StartTime	Genotpe	Copulation rate	StartTime
UAS-dTrpA/﹢;ΔDsk/R71G01-GAL4,ΔDsk 29°C	0	00:04:53	UAS-dTrpA/﹢;ΔDsk/R71G01-GAL4,ΔDsk 21℃	0	00:03:09		UAS-dTrpA/﹢;﹢/R71G01-GAL4,ΔDsk 29°C	0	00:01:46	UAS-dTrpA/﹢;﹢/R71G01-GAL4,ΔDsk 21℃	0	00:05:09		UAS-dTrpA/﹢;﹢/ΔDsk 29°C	0	00:11:29	UAS-dTrpA/﹢;﹢/ΔDsk 21°C	0	00:03:27		﹢/﹢;﹢/R71G01-GAL4,ΔDsk 29°C	0	00:03:48	﹢/﹢;﹢/R71G01-GAL4,ΔDsk 21°C	0	00:01:17
	0	00:03:35		0	00:28:32			0.0454545	00:01:34		0.0215827	00:02:56			0.0441176	00:04:08		0.0198675	00:30:00			0.096	00:01:44		0.020979	00:04:29
	0.00657895	00:30:00		0.0261438	00:05:59			0.287879	00:02:15		0.0791367	00:10:46			0.213235	00:30:00		0.10596	00:07:43			0.296	00:30:00		0.188811	00:02:14
	0.105263	00:11:40		0.130719	00:30:00			0.507576	00:05:44		0.151079	00:07:09			0.360294	00:02:02		0.298013	00:07:27			0.512	00:01:28		0.468531	00:05:34
	0.256579	00:30:00		0.20915	00:06:11			0.613636	00:02:32		0.258993	00:19:48			0.433824	00:01:34		0.417219	00:03:39			0.656	00:02:31		0.608392	00:04:04
	0.368421	00:30:00		0.294118	00:15:44			0.772727	00:02:15		0.330935	00:30:00			0.507353	00:21:27		0.483444	00:02:32			0.728	00:01:51		0.692308	00:30:00
	0.414474	00:03:53		0.398693	00:08:40			0.825758	00:01:22		0.395683	00:07:55			0.558824	00:04:08		0.523179	00:06:47			0.76	00:02:04		0.748252	00:02:39
	0.539474	00:04:22		0.509804	00:09:32			0.893939	00:02:41		0.460432	00:07:11			0.573529	00:01:55		0.596026	00:30:00			0.792	00:03:58		0.79021	00:30:00
	0.592105	00:09:07		0.562092	00:10:03			0.924242	00:02:39		0.546763	00:02:57			0.602941	00:09:28		0.642384	00:05:18			0.832	00:01:25		0.832168	00:08:13
	0.625	00:19:18		0.607843	00:06:10			0.939394	00:00:57		0.589928	00:30:00			0.610294	00:12:44		0.655629	00:30:00			0.84	00:01:54		0.846154	00:02:03
	0.644737	00:07:20		0.640523	00:30:00			0.94697	00:02:39		0.676259	00:08:35			0.661765	00:01:28		0.662252	00:30:00			0.848	00:00:48		0.867133	00:09:11
	0.671053	00:02:35		0.686275	00:30:00			0.962121	00:06:10		0.719424	00:03:30			0.676471	00:04:20		0.668874	00:12:53			0.848	00:02:43		0.867133	00:02:32
	0.703947	00:30:00		0.705882	00:02:06			0.969697	00:01:02		0.741007	00:22:18			0.691176	00:00:29		0.682119	00:06:13			0.856	00:03:18		0.867133	00:03:06
	0.717105	00:03:44		0.732026	00:07:38			0.969697	00:01:03		0.741007	00:30:00			0.720588	00:05:18		0.701987	00:05:48			0.864	00:03:50		0.867133	00:01:49
	0.743421	00:03:41		0.751634	00:04:04			0.977273	00:05:57		0.76259	00:05:45			0.727941	00:01:16		0.708609	00:03:49			0.872	00:03:33		0.874126	00:02:43
	0.743421	00:06:28		0.764706	00:01:31			0.984848	00:04:55		0.776978	00:30:00			0.727941	00:12:17		0.721854	00:02:00			0.88	00:30:00		0.881119	00:07:24
	0.75	00:30:00		0.777778	00:05:26			0.984848	00:01:38		0.791367	00:06:21			0.742647	00:30:00		0.735099	00:02:08			0.888	00:01:33		0.895105	00:02:48
	0.756579	00:03:01		0.79085	00:04:47			0.984848	00:00:31		0.805755	00:30:00			0.764706	00:30:00		0.761589	00:07:46			0.896	00:02:17		0.895105	00:02:05
	0.763158	00:03:53		0.79085	00:06:19			0.984848	00:03:37		0.81295	00:27:16			0.764706	00:30:00		0.774834	00:02:10			0.904	00:02:03		0.895105	00:15:07
	0.789474	00:30:00		0.797386	00:30:00			0.984848	00:06:02		0.820144	00:11:00			0.764706	00:30:00		0.774834	00:04:13			0.912	00:02:15		0.895105	00:02:58
	0.802632	00:11:28		0.797386	00:05:17			0.984848	00:02:57		0.841727	00:13:11			0.764706	00:01:11		0.774834	00:01:56			0.912	00:00:34		0.895105	00:02:25
	0.802632	00:03:44		0.810458	00:04:22			0.984848	00:04:31		0.848921	00:24:58			0.764706	00:01:22		0.781457	00:01:15			0.912	00:00:58		0.895105	00:02:49
	0.802632	00:05:20		0.816993	00:08:55			0.984848	00:30:00		0.848921	00:07:35			0.779412	00:03:22		0.781457	00:04:48			0.912	00:00:17		0.902098	00:07:19
	0.802632	00:02:48		0.823529	00:06:53			0.984848	00:04:33		0.863309	00:30:00			0.779412	00:00:48		0.788079	00:30:00			0.92	00:04:11		0.902098	00:02:02
	0.809211	00:18:43		0.836601	00:05:43			0.984848	00:04:35		0.863309	00:01:00			0.786765	00:13:48		0.801325	00:02:25			0.92	00:18:48		0.902098	00:30:00
	0.809211	00:06:37		0.836601	00:06:26			0.984848	00:01:38		0.870504	00:11:00			0.786765	00:30:00		0.807947	00:15:28			0.92	00:07:58		0.902098	00:05:34
	0.809211	00:30:00		0.843137	00:30:00			0.984848	00:03:13		0.870504	00:13:11			0.794118	00:00:58		0.807947	00:04:44			0.92	00:15:26		0.902098	00:09:15
	0.809211	00:02:16		0.843137	00:05:56			0.984848	00:04:01		0.870504	00:04:27			0.794118	00:02:37		0.807947	00:02:01			0.92	00:01:42		0.902098	00:04:56
	0.809211	00:02:10		0.843137	00:05:21			0.984848	00:04:15		0.877698	00:07:32			0.794118	00:02:02		0.821192	00:02:49			0.92	00:03:57		0.902098	00:01:07
	0.809211	00:08:00		0.849673	00:08:06			0.984848	00:02:46		0.877698	00:08:12			0.794118	00:30:00		0.821192	00:03:02			0.92	00:05:16		0.909091	00:01:39
	0.815789	00:30:00		0.849673	00:11:23			0.984848	00:07:28		0.877698	00:10:20			0.794118	00:02:43		0.821192	00:16:39			0.928	00:03:46		0.909091	00:02:05
		00:04:18			00:06:34				00:02:27			00:10:08				00:01:07			00:07:22				00:03:23			00:01:58
		00:19:13			00:03:25				00:03:15			00:14:45				00:02:13			00:02:25				00:03:00			00:30:00
		00:06:06			00:11:48				00:04:42			00:10:46				00:02:47			00:30:00				00:00:56			00:14:23
		00:06:46			00:08:45				00:02:44			00:06:58				00:03:12			00:02:01				00:04:56			00:03:04
		00:06:56			00:30:00				00:04:08			00:06:35				00:30:00			00:01:38				00:01:05			00:02:06
		00:06:49			00:14:43				00:01:01			00:02:29				00:03:23			00:06:58				00:11:02			00:01:47
		00:04:55			00:02:24				00:01:18			00:05:42				00:06:34			00:30:00				00:30:00			00:04:19
		00:11:11			00:03:49				00:01:06			00:13:33				00:25:53			00:03:05				00:01:42			00:02:03
		00:09:49			00:05:02				00:00:53			00:16:57				00:02:53			00:02:08				00:01:39			00:03:39
		00:06:15			00:07:55				00:01:15			00:10:04				00:30:00			00:06:24				00:06:24			00:30:00
		00:13:30			00:13:01				00:01:21			00:17:55				00:01:03			00:03:02				00:03:00			00:05:14
		00:07:53			00:02:13				00:02:08			00:10:00				00:01:48			00:04:32				00:01:40			00:02:15
		00:04:44			00:05:02				00:01:54			00:03:00				00:02:37			00:30:00				00:30:00			00:02:53
		00:06:21			00:16:52				00:02:49			00:02:05				00:01:32			00:30:00				00:07:13			00:07:00
		00:05:02			00:07:15				00:08:51			00:04:18				00:16:08			00:17:36				00:01:57			00:01:51
		00:12:35			00:12:04				00:08:02			00:30:00				00:15:39			00:08:19				00:03:25			00:04:04
		00:29:30			00:05:42				00:06:08			00:30:00				00:16:33			00:11:03				00:01:51			00:00:24
		00:15:22			00:22:39				00:02:10			00:07:23				00:05:57			00:30:00				00:02:02			00:02:33
		00:03:48			00:30:00				00:04:53			00:15:31				00:01:57			00:03:32				00:02:03			00:04:17
		00:02:22			00:03:41				00:01:21			00:07:29				00:04:26			00:12:40				00:03:36			00:02:29
		00:06:47			00:30:00				00:04:00			00:20:54				00:04:36			00:30:00				00:03:00			00:02:23
		00:30:00			00:20:45				00:03:10			00:04:54				00:07:20			00:30:00				00:01:43			00:30:00
		00:03:31			00:05:37				00:10:51			00:19:13				00:30:00			00:07:09				00:02:42			00:03:18
		00:03:20			00:05:37				00:01:32			00:00:58				00:03:21			00:01:44				00:03:04			00:06:12
		00:07:51			00:11:29				00:07:05			00:10:11				00:30:00			00:09:02				00:02:00			00:00:58
		00:03:00			00:02:52				00:04:14			00:09:34				00:02:05			00:04:06				00:08:21			00:21:16
		00:04:57			00:06:41				00:03:05			00:06:48				00:30:00			00:03:28				00:14:43			00:02:43
		00:05:45			00:30:00				00:01:50			00:07:42				00:09:03			00:05:52				00:02:41			00:01:35
		00:08:58			00:03:42				00:02:49			00:04:14				00:07:28			00:12:14				00:04:03			00:04:48
		00:02:24			00:06:15				00:01:11			00:03:56				00:04:10			00:20:07				00:03:07			00:02:42
		00:02:19			00:18:30				00:02:31			00:10:12				00:23:21			00:02:47				00:01:33			00:04:30
		00:30:00			00:02:00				00:05:33			00:03:38				00:30:00			00:03:25				00:03:26			00:03:06
		00:07:17			00:06:20				00:30:00			00:02:07				00:00:40			00:24:35				00:00:57			00:02:43
		00:04:29			00:30:00				00:01:01			00:09:42				00:09:48			00:15:52				00:02:20			00:30:00
		00:06:54			00:02:55				00:03:02			00:30:00				00:30:00			00:02:57				00:30:00			00:05:40
		00:04:18			00:03:05				00:03:02			00:06:21				00:03:48			00:17:05				00:07:11			00:01:54
		00:05:15			00:06:23				00:02:51			00:30:00				00:01:56			00:07:31				00:06:21			00:06:18
		00:30:00			00:13:45				00:05:09			00:09:27				00:01:07			00:02:31				00:03:01			00:01:38
		00:30:00			00:10:01				00:05:13			00:03:12				00:04:03			00:30:00				00:16:40			00:05:01
		00:06:53			00:30:00				00:05:10			00:30:00				00:01:06			00:30:00				00:06:21			00:02:24
		00:03:14			00:30:00				00:02:24			00:06:46				00:01:38			00:30:00				00:05:57			00:02:06
		00:09:00			00:06:08				00:03:18			00:04:44				00:30:00			00:04:39				00:30:00			00:01:31
		00:04:04			00:06:54				00:01:37			00:09:46				00:02:11			00:30:00				00:02:07			00:01:03
		00:30:00			00:30:00				00:11:27			00:19:30				00:30:00			00:04:40				00:02:49			00:04:55
		00:05:17			00:12:31				00:04:14			00:07:35				00:08:33			00:30:00				00:05:51			00:01:52
		00:04:22			00:03:20				00:02:29			00:07:39				00:30:00			00:01:55				00:03:38			00:03:45
		00:08:55			00:05:20				00:00:57			00:09:15				00:01:05			00:00:28				00:02:11			00:01:02
		00:06:53			00:01:33				00:09:32			00:00:58				00:30:00			00:22:10				00:02:01			00:02:03
		00:04:05			00:04:57				00:02:58			00:05:38				00:01:51			00:02:04				00:13:34			00:05:18
		00:07:28			00:05:21				00:02:37			00:30:00				00:09:25			00:01:45				00:01:11			00:06:17
		00:03:09			00:03:35				00:02:14			00:30:00				00:15:46			00:02:01				00:03:03			00:02:37
		00:23:40			00:10:30				00:06:17			00:01:54				00:04:11			00:30:00				00:02:25			00:03:51
		00:04:06			00:02:53				00:01:26			00:11:51				00:02:51			00:02:36				00:30:00			00:01:10
		00:03:14			00:06:28				00:01:57			00:09:33				00:03:11			00:03:25				00:00:48			00:03:24
		00:30:00			00:02:50				00:06:30			00:02:45				00:09:18			00:01:13				00:06:26			00:07:24
		00:03:51			00:04:39				00:02:52			00:07:15				00:21:58			00:02:19				00:04:51			00:02:38
		00:05:02			00:16:32				00:01:47			00:01:25				00:01:20			00:16:20				00:01:46			00:04:13
		00:02:28			00:06:44				00:01:19			00:03:54				00:10:27			00:10:15				00:04:33			00:03:23
		00:02:34			00:04:12				00:06:51			00:09:11				00:02:00			00:02:02				00:01:36			00:02:16
		00:10:10			00:04:41				00:04:41			00:04:38				00:09:08			00:11:00				00:04:11			00:02:53
		00:30:00			00:03:01				00:02:57			00:06:36				00:04:08			00:02:04				00:02:48			00:30:00
		00:06:31			00:04:04				00:10:32			00:05:30				00:30:00			00:30:00				00:01:56			00:03:56
		00:18:21			00:14:32				00:00:54			00:01:52				00:02:49			00:30:00				00:07:26			00:03:18
		00:30:00			00:08:26				00:04:30			00:05:50				00:10:11			00:06:44				00:04:27			00:02:08
		00:06:15			00:09:32				00:03:42			00:04:42				00:02:06			00:14:16				00:02:36			00:02:41
		00:18:30			00:30:00				00:03:01			00:09:15				00:02:39			00:04:21				00:17:20			00:30:00
		00:02:00			00:10:39				00:04:05			00:01:15				00:00:54			00:30:00				00:09:10			00:04:03
		00:06:20			00:07:48				00:04:01			00:06:04				00:05:14			00:30:00				00:02:33			00:16:00
		00:30:00			00:02:22				00:06:40			00:03:15				00:30:00			00:03:37				00:03:28			00:07:35
		00:02:55			00:10:21				00:01:31			00:08:02				00:01:46			00:30:00				00:04:00			00:03:34
		00:03:05			00:23:34				00:02:11			00:13:13				00:01:46			00:30:00				00:02:32			00:02:45
		00:06:23			00:15:52				00:01:43			00:14:29				00:30:00			00:04:29				00:04:30			00:01:06
		00:13:45			00:03:00				00:02:34			00:08:47				00:30:00			00:14:01				00:01:54			00:02:05
		00:10:01			00:05:18				00:07:39			00:09:09				00:30:00			00:02:38				00:02:10			00:02:20
		00:30:00			00:23:39				00:01:50			00:05:09				00:07:50			00:30:00				00:02:14			00:01:02
		00:30:00			00:07:29				00:06:02			00:02:56				00:04:10			00:04:31				00:30:00			00:03:06
		00:30:00			00:09:33				00:04:16			00:01:38				00:01:45			00:01:11				00:03:08			00:00:31
		00:13:46			00:04:46				00:03:49			00:07:09				00:03:03			00:03:56				00:30:00			00:02:53
		00:30:00			00:02:18				00:14:57			00:19:48				00:11:27			00:01:49				00:12:35			00:01:46
		00:30:00			00:09:18				00:01:36			00:30:00				00:02:03			00:23:32				00:22:25			00:06:23
		00:18:20			00:04:50				00:04:12			00:07:55				00:02:42			00:07:11				00:30:00			00:01:42
		00:11:45			00:10:35				00:03:36			00:07:11				00:02:05			00:01:23				00:01:50			00:07:38
		00:03:24			00:21:02				00:04:04			00:02:57				00:02:50			00:08:29				00:00:28			00:05:11
		00:30:00			00:06:18				00:01:33			00:30:00				00:30:00			00:13:18				00:01:41			00:03:30
		00:11:43			00:20:42				00:02:41			00:08:35				00:30:00			00:06:06				00:01:16			00:30:00
		00:08:03			00:08:16				00:03:20			00:03:30				00:09:20			00:02:18				00:07:12			00:02:09
		00:30:00			00:30:00				00:04:18			00:22:18				00:16:16			00:01:05				00:00:39			00:05:52
		00:03:47			00:30:00				00:13:37			00:30:00				00:01:58			00:02:17				00:01:50			00:02:32
		00:30:00			00:10:42				00:00:34			00:05:45				00:03:58			00:02:54				00:01:00			00:03:27
		00:03:36			00:07:09				00:02:00			00:02:45				00:05:32			00:00:52				00:02:00			00:01:38
		00:10:51			00:12:05				00:02:41			00:03:29				00:03:19			00:06:47				00:00:35			00:01:39
		00:03:41			00:06:16				00:01:07			00:03:22				00:30:00			00:30:00				00:05:25			00:13:31
		00:03:22			00:07:19				00:01:44			00:27:16				00:07:03			00:16:22				00:01:03			00:06:34
		00:06:40			00:30:00				00:03:06			00:02:29				00:00:45			00:03:09				00:00:46			00:03:54
		00:05:33			00:25:40				00:01:24			00:05:10				00:30:00			00:27:13							00:03:52
		00:30:00			00:02:36				00:04:14			00:24:58				00:05:58			00:03:25							00:02:23
		00:04:38			00:30:00				00:01:52			00:07:35				00:02:27			00:03:00							00:04:56
		00:17:39			00:08:34				00:02:53			00:30:00				00:05:24			00:05:21							00:30:00
		00:07:45			00:05:44				00:06:04			00:01:00				00:01:23			00:03:34							00:08:10
		00:04:24			00:30:00				00:05:51			00:02:29				00:12:24			00:02:47							00:28:29
		00:02:17			00:03:19				00:07:20			00:05:10				00:06:22			00:05:07							00:30:00
		00:04:45			00:02:17							00:04:27				00:12:14			00:06:06							00:03:24
		00:03:00			00:04:45							00:07:32				00:03:09			00:03:41							00:07:52
		00:03:43			00:03:00							00:08:12				00:05:03			00:05:29							00:09:39
		00:01:36			00:03:43							00:01:38				00:30:00			00:23:15							00:03:00
		00:30:00			00:01:36							00:01:25							00:01:43							00:30:00
		00:30:00			00:30:00							00:03:54							00:02:52							00:05:40
		00:04:01			00:30:00														00:06:47							00:01:54
		00:03:25			00:02:01														00:06:06							00:06:18
		00:07:38			00:01:15														00:02:18							00:01:38
		00:03:14			00:03:22														00:01:05							00:05:01
		00:06:19			00:06:52														00:02:17							00:02:24
		00:13:20			00:04:40														00:02:54
		00:16:03			00:12:56														00:00:52
		00:04:04			00:05:15														00:06:47
		00:10:55			00:30:00														00:30:00
		00:08:17			00:30:00														00:16:22
		00:02:42			00:07:32														00:03:09
		00:12:03			00:13:33														00:27:13
		00:06:40			00:09:52														00:03:25
		00:08:31			00:04:28
					00:02:16
