# Supplementary material for: Drosulfakinin signaling modulates female sexual receptivity in Drosophila
Source: eLife. 2022 Apr 27;11:e76025. doi: 10.7554/eLife.76025 (PMC9045819; doi:10.7554/eLife.76025)
Supplement: Figure 6—source data 1. [file elife-76025-fig6-data1.xlsx]

## Sheet: Sheet1
Figure 6B					Figure 6C
	current responses		current responses			current responses		current responses
DSK-M	38.1	DSK-M control	2.8		DSK-L	28.6	DSK-L control	0
	34.9		5.4			14.3		0.2
	23.9		0.7			12.8		1
	18.4		2.3			8.2		0.6
	16.7		0.1			9.4		0.9
	15		0.1			15.9		0.2
